# Supplementary material for: Biomimetic heterobimetallic architecture of Ni(ii) and Fe(ii) for CO2 hydrogenation in aqueous media. A DFT study
Source: Royal Society of Chemistry journal article supplement (doi:10.1039/c9ra07139c), 2019-01-01
Supplement: c9ra07139c1.pdf [file c9ra07139c1.pdf]

## Supplementary Data

### **Bio-mimetic Hetero-Bimetallic Architecture of Ni(II) and Fe(II) for CO<sub>2</sub> Hydrogenation in Aqueous Media. A DFT Study.**

Bilal Ahmad Shiekh,\*

Department of Chemistry, UGC Sponsored Centre of Advanced Studies-II, Guru Nanak Dev  
University, Amritsar-143005 India.

\*E-mail [bilal.ahmad459@gmail.com](mailto:bilal.ahmad459@gmail.com);

**NOTE: All the given values are in ‘hartrees’ unless mentioned otherwise.**

**1. (I) Comparison of computed barrier height of NiFe1 (kcal mol<sup>-1</sup>) at various DFT functionals using PBE-D3 optimized geometries.**

|                | PBE-D3       | M06L        | M06          | PBE0-D3      | B3LYP        |
|----------------|--------------|-------------|--------------|--------------|--------------|
| NiFe           | -2657.561533 | -2659.23558 | -2658.563632 | -2657.628457 | -2659.31116  |
| NiFe1          | -2658.720787 | -2660.39972 | -2659.720842 | -2658.788741 | -2660.470849 |
| H <sub>2</sub> | -1.163558    | -1.169106   | -1.168309    | -1.165914    | -1.177418    |
| Barrier height | 0.81         | 1.23        | 5.07         | 1.64         | 9.24         |
|                |              |             |              |              |              |

**(II) Comparison of barrier height of NiFe1 (kcal mol<sup>-1</sup>) computed by using two different basis sets LANL2DZ and SDD for Ni and Fe centers.**

|                | PBE-D3/6-31+G(d,p)//LANL2DZ | PBE-D3/6-31+G(d,p)//SDD |
|----------------|-----------------------------|-------------------------|
| NiFe           | -2657.561533                | -2659.689385            |
| NiFe1          | -2658.720787                | -2660.847903            |
| Barrier Height | 0.81                        | 1.27                    |

**2. Optimized geometries of CO2 hydrogenation cycle.**

**(I) Model 1:**

**Name-CO2:** G=-188.408473//H=-188.384108//SPE=-188.3987698

Angstroms

| Atom | X          | Y          | Z           |
|------|------------|------------|-------------|
| C    | 0.00000000 | 0.00000000 | 0.00000000  |
| O    | 0.00000000 | 0.00000000 | 1.18037922  |
| O    | 0.00000000 | 0.00000000 | -1.18037922 |

**Name-HCOOH:** G=-189.574978//H=-189.546648//SPE=-189.5831106

Angstroms

| Atom | X           | Y           | Z           |
|------|-------------|-------------|-------------|
| C    | 0.12007422  | 0.37842142  | 0.00002373  |
| H    | 0.02903271  | 1.48273467  | 0.00022663  |
| O    | 1.18779078  | -0.22381427 | -0.00005317 |
| O    | -1.05658723 | -0.28957466 | 0.00009812  |
| H    | -1.79910644 | 0.35384822  | -0.00072863 |

**Name-H2:** G=-1.163558//H=-1.148747//SPE=-1.1619885

Angstroms

| Atom | X          | Y           | Z          |
|------|------------|-------------|------------|
| H    | 0.00000000 | -0.00000000 | 0.37520468 |

H 0.00000000 0.00000000 -0.37520468

**Name-HCOO-:** G= -189.136888//H= -189.109070//SPE =-189.1327082

Angstroms

| Atom | X           | Y           | Z           |
|------|-------------|-------------|-------------|
| C    | -0.00008000 | 0.34696600  | 0.00000000  |
| H    | 0.00176400  | 1.46969800  | 0.00000000  |
| O    | -0.00008000 | -0.22196800 | 1.14238000  |
| O    | -0.00008000 | -0.22196800 | -1.14238000 |

**Name-NiFe:** G= -2657.561533//H= -2657.471272//SPE =-2658.0149592

Angstroms

| Atom | X           | Y           | Z           |
|------|-------------|-------------|-------------|
| S    | -0.44034190 | -1.51884023 | -1.74130495 |
| Ni   | -1.69375585 | 0.00026753  | -0.79043753 |
| Fe   | 1.10271352  | 0.00095411  | -0.80131235 |
| S    | -0.44116245 | 1.52102659  | -1.73954935 |
| C    | -1.05374818 | -2.88540093 | -0.62564246 |
| C    | -2.54728089 | -2.66047437 | -0.42417012 |
| H    | -0.50248705 | -2.86732390 | 0.32533405  |
| H    | -0.87189983 | -3.85299841 | -1.11980467 |
| C    | -1.05589318 | 2.88647145  | -0.62326453 |
| C    | -2.54921619 | 2.66008129  | -0.42197221 |
| H    | -0.87493683 | 3.85442611  | -1.11705219 |
| H    | -0.50459156 | 2.86860970  | 0.32768584  |
| N    | -2.78588035 | -1.29879766 | 0.15998275  |
| N    | -2.78671635 | 1.29774443  | 0.16110564  |
| H    | -2.98005561 | -3.43215386 | 0.24159992  |
| H    | -3.06880593 | -2.70364901 | -1.39321099 |
| C    | -4.17699581 | -0.78020325 | -0.05831760 |
| C    | -4.17752595 | 0.77839077  | -0.05751061 |
| H    | -4.50403019 | 1.13790678  | -1.04327574 |
| H    | -4.86098097 | 1.19512361  | 0.70395757  |
| H    | -4.50313425 | -1.13892743 | -1.04449522 |
| H    | -4.86027697 | -1.19813429 | 0.70265616  |
| C    | -2.42177544 | -1.28488622 | 1.61826573  |
| C    | -2.42246413 | 1.28287167  | 1.61930923  |
| H    | -1.33312993 | 1.41940673  | 1.69418980  |
| H    | -2.91380626 | 2.14907574  | 2.10227319  |
| H    | -2.91275462 | -2.15170334 | 2.10050109  |
| H    | -1.33239394 | -1.42094166 | 1.69309917  |
| C    | -2.85974805 | -0.00140097 | 2.31968750  |
| P    | 2.35721606  | -1.38961893 | 0.33098076  |
| P    | 2.35545739  | 1.39015517  | 0.33457393  |
| C    | 2.23902085  | 0.00304394  | -2.19548270 |
| N    | 2.96851786  | 0.00411009  | -3.15236985 |
| H    | -3.07075421 | 2.70354665  | -1.39098984 |
| H    | -2.98265870 | 3.43088578  | 0.24437975  |
| C    | 1.82840894  | 1.23104201  | 2.12909415  |
| C    | 1.83176340  | -1.23538340 | 2.12634146  |
| N    | 1.06111489  | -0.00342081 | 2.34908605  |

|   |             |             |             |
|---|-------------|-------------|-------------|
| H | 1.16937564  | 2.08891246  | 2.34585074  |
| H | 2.72384889  | 1.31075670  | 2.78971040  |
| H | 1.17552383  | -2.09554803 | 2.34248065  |
| H | 2.72808999  | -1.31347007 | 2.78590601  |
| C | 0.48501115  | -0.00576107 | 3.69875311  |
| H | -0.14256950 | -0.90181970 | 3.83168283  |
| H | -0.14356151 | 0.88918534  | 3.83437940  |
| H | 1.26706184  | -0.00643584 | 4.49209903  |
| C | 4.11415820  | 0.77325107  | 0.33655259  |
| C | 4.11517143  | -0.77084250 | 0.33288117  |
| C | 2.54458008  | 3.19868616  | 0.07407168  |
| H | 2.89058112  | 3.36652976  | -0.95820345 |
| H | 3.28971499  | 3.60084489  | 0.78077364  |
| H | 1.58462542  | 3.71425862  | 0.22157107  |
| C | 2.54757495  | -3.19710333 | 0.06452705  |
| H | 1.58853862  | -3.71411170 | 0.21294273  |
| H | 3.29499926  | -3.60079200 | 0.76792108  |
| H | 2.89090422  | -3.36123932 | -0.96923720 |
| H | -2.42184682 | -0.00172167 | 3.33061082  |
| H | -3.95307106 | -0.00174769 | 2.46129058  |
| H | 4.59428533  | -1.16908711 | -0.57602898 |
| H | 4.63594531  | -1.19412117 | 1.20778897  |
| H | 4.63275884  | 1.19295695  | 1.21445959  |
| H | 4.59457284  | 1.17643125  | -0.56949840 |

**Name-NiFe1:**G= -2658.720787//H= -2658.630821//SPE =-2659.1926516  
 Angstroms

| Atom | X           | Y           | Z           |
|------|-------------|-------------|-------------|
| S    | 0.59111877  | 1.54666122  | -1.66268385 |
| Ni   | 1.82867831  | -0.00000380 | -0.70323657 |
| Fe   | -0.96908236 | -0.00011076 | -0.68921357 |
| S    | 0.59124118  | -1.54683692 | -1.66262639 |
| C    | 1.20749279  | 2.89596724  | -0.53529524 |
| C    | 2.69203472  | 2.66201680  | -0.29554181 |
| H    | 0.62493153  | 2.89354118  | 0.39792495  |
| H    | 1.04789351  | 3.86399885  | -1.03716565 |
| C    | 1.20779684  | -2.89604784 | -0.53521556 |
| C    | 2.69230386  | -2.66191765 | -0.29544780 |
| H    | 1.04832451  | -3.86409753 | -1.03709375 |
| H    | 0.62523374  | -2.89371088 | 0.39800355  |
| N    | 2.90091546  | 1.29480115  | 0.28615154  |
| N    | 2.90103026  | -1.29466086 | 0.28620219  |
| H    | 3.11964212  | 3.42476093  | 0.38412113  |
| H    | 3.23633954  | 2.70258671  | -1.25219929 |
| C    | 4.29892504  | 0.77831346  | 0.11742482  |
| C    | 4.29899656  | -0.77804565 | 0.11746598  |
| H    | 4.65947816  | -1.13796599 | -0.85611897 |
| H    | 4.95415241  | -1.19671897 | 0.90281913  |
| H    | 4.65936320  | 1.13822048  | -0.85618128 |
| H    | 4.95404918  | 1.19708419  | 0.90275313  |

|   |             |             |             |
|---|-------------|-------------|-------------|
| C | 2.49122552  | 1.28607517  | 1.73352600  |
| C | 2.49132067  | -1.28589774 | 1.73356352  |
| H | 1.40220521  | -1.43861558 | 1.77371676  |
| H | 2.97805186  | -2.14691056 | 2.23009529  |
| H | 2.97793050  | 2.14712865  | 2.23000605  |
| H | 1.40210872  | 1.43874151  | 1.77367241  |
| C | 2.88961139  | 0.00011579  | 2.45438575  |
| P | -2.43824088 | 1.38448038  | 0.15803438  |
| P | -2.43807826 | -1.38467236 | 0.15843885  |
| C | -1.85181569 | -0.00015202 | -2.32396195 |
| N | -2.39149759 | -0.00015165 | -3.39326611 |
| H | 3.23663131  | -2.70245985 | -1.25209194 |
| H | 3.11997191  | -3.42459386 | 0.38425318  |
| C | -2.45455204 | -1.22742702 | 2.03931606  |
| C | -2.45447970 | 1.22806848  | 2.03895251  |
| N | -1.78843488 | 0.00036546  | 2.48613203  |
| H | -1.89941081 | -2.08964617 | 2.44574226  |
| H | -3.50872561 | -1.29910076 | 2.38782373  |
| H | -1.89916877 | 2.09038852  | 2.44494048  |
| H | -3.50859249 | 1.30000601  | 2.38759141  |
| C | -1.58772941 | 0.00058157  | 3.94224992  |
| H | -1.01385783 | 0.89563448  | 4.23287005  |
| H | -1.01384639 | -0.89437606 | 4.23314017  |
| H | -2.54702912 | 0.00066118  | 4.50332062  |
| C | -4.13867950 | -0.77367881 | -0.30555030 |
| C | -4.13880744 | 0.77304005  | -0.30562420 |
| C | -2.50649834 | -3.19799047 | -0.11824211 |
| H | -2.57889054 | -3.38634539 | -1.20098124 |
| H | -3.38574347 | -3.62727368 | 0.39055293  |
| H | -1.59022581 | -3.66808560 | 0.26974269  |
| C | -2.50693524 | 3.19764991  | -0.11952927 |
| H | -1.59064803 | 3.66802683  | 0.26808459  |
| H | -3.38615123 | 3.62708958  | 0.38918038  |
| H | -2.57949338 | 3.38544749  | -1.20235497 |
| H | 0.18445023  | -0.00016767 | 0.48210586  |
| H | -0.54337364 | 0.00012624  | 0.94610644  |
| H | 2.39707280  | 0.00010040  | 3.44083727  |
| H | 3.97393113  | 0.00015862  | 2.65436961  |
| H | -4.36501733 | 1.17428124  | -1.30629320 |
| H | -4.87109578 | 1.19181496  | 0.40478605  |
| H | -4.87100758 | -1.19251278 | 0.40478721  |
| H | -4.36466010 | -1.17504600 | -1.30622017 |

Name-NiFe2:G= -2658.720595//H= -2658.556121//SPE =-2659.195704

Angstroms

| Atom | X           | Y           | Z           |
|------|-------------|-------------|-------------|
| S    | -0.48667789 | -1.54973520 | -1.77742986 |
| Ni   | -1.68777527 | 0.00047914  | -0.76527519 |
| Fe   | 1.03440025  | 0.00079773  | -0.76225688 |
| S    | -0.48698964 | 1.55282379  | -1.77387734 |

|   |             |             |             |
|---|-------------|-------------|-------------|
| C | -1.10665418 | -2.88986498 | -0.64131243 |
| C | -2.58921311 | -2.65903988 | -0.39077918 |
| H | -0.52742076 | -2.87034917 | 0.29348396  |
| H | -0.94599914 | -3.86610224 | -1.12742032 |
| C | -1.10856872 | 2.89132611  | -0.63670163 |
| C | -2.59107160 | 2.65878357  | -0.38754619 |
| H | -0.94846016 | 3.86811396  | -1.12186362 |
| H | -0.53001384 | 2.87160544  | 0.29853846  |
| N | -2.79401650 | -1.29589714 | 0.19906807  |
| N | -2.79472083 | 1.29478995  | 0.20064933  |
| H | -3.01351575 | -3.42626674 | 0.28709258  |
| H | -3.13913906 | -2.69424517 | -1.34453794 |
| C | -4.18931284 | -0.77811142 | 0.02536258  |
| C | -4.18974074 | 0.77639034  | 0.02658435  |
| H | -4.54769276 | 1.13604284  | -0.94804082 |
| H | -4.85011282 | 1.19384418  | 0.80917836  |
| H | -4.54689598 | -1.13651768 | -0.94985789 |
| H | -4.84956377 | -1.19704680 | 0.80728093  |
| C | -2.39713488 | -1.29247028 | 1.64809921  |
| C | -2.39689769 | 1.28971997  | 1.64930255  |
| H | -1.31011710 | 1.45497378  | 1.69434569  |
| H | -2.89667874 | 2.14369147  | 2.14682171  |
| H | -2.89773005 | -2.14665911 | 2.14442824  |
| H | -1.31051456 | -1.45851358 | 1.69374068  |
| C | -2.79194391 | -0.00164569 | 2.36619343  |
| P | 2.33901171  | -1.37646965 | 0.26873277  |
| P | 2.33785871  | 1.37674728  | 0.27211224  |
| C | 2.09506245  | 0.00327278  | -2.30910062 |
| N | 2.76098136  | 0.00434716  | -3.31033113 |
| H | -3.14028402 | 2.69431775  | -1.34169678 |
| H | -3.01669489 | 3.42484470  | 0.29081963  |
| C | 2.05759813  | 1.25276766  | 2.14268162  |
| C | 2.05533185  | -1.25946886 | 2.13903875  |
| N | 1.29565782  | -0.00306375 | 2.44449285  |
| H | 1.43032602  | 2.09893695  | 2.46353425  |
| H | 2.99969954  | 1.25020651  | 2.71308619  |
| H | 1.42521874  | -2.10542083 | 2.45499751  |
| H | 2.99613864  | -1.26158381 | 2.71158484  |
| C | 0.70207054  | -0.00448398 | 3.81225445  |
| H | 0.08258846  | -0.90535696 | 3.92381019  |
| H | 0.08386235  | 0.89699094  | 3.92615525  |
| H | 1.51006012  | -0.00596102 | 4.55824618  |
| C | 4.10248001  | 0.77411040  | 0.12636274  |
| C | 4.10323148  | -0.77115440 | 0.12705983  |
| C | 2.49906848  | 3.19635764  | 0.04488883  |
| H | 2.72641750  | 3.38846731  | -1.01581932 |
| H | 3.31639023  | 3.58912355  | 0.67268002  |
| H | 1.55849221  | 3.70273137  | 0.30766259  |
| C | 2.50317408  | -3.19511467 | 0.03622845  |
| H | 1.56260717  | -3.70356956 | 0.29498957  |
| H | 3.31944359  | -3.58880307 | 0.66482101  |
| H | 2.73350084  | -3.38348462 | -1.02450506 |

|   |             |             |             |
|---|-------------|-------------|-------------|
| H | -0.03918886 | -0.00285274 | 0.41773657  |
| H | -2.30584317 | -0.00214108 | 3.35560426  |
| H | -3.87734017 | -0.00162345 | 2.56174142  |
| H | 4.49542129  | -1.17307780 | -0.82118104 |
| H | 4.70312566  | -1.19271155 | 0.95072694  |
| H | 4.70428759  | 1.19707329  | 0.94789986  |
| H | 4.49133127  | 1.17555583  | -0.82343341 |
| H | 0.52303056  | -0.00145093 | 1.67311915  |

**Name-NiFe3:**G= -2847.115645//H= -2847.016787//SPE =-2847.5994969

Angstroms

| Atom | X           | Y           | Z           |
|------|-------------|-------------|-------------|
| S    | -0.67676820 | -1.21649982 | -1.47222058 |
| Ni   | -2.09528980 | 0.11146562  | -0.48540102 |
| S    | -0.69258524 | 1.74572352  | -0.81484939 |
| C    | -1.45391479 | -2.71089134 | -0.67870156 |
| C    | -2.95584679 | -2.53800056 | -0.91168759 |
| H    | -1.19569701 | -2.76379255 | 0.39067831  |
| H    | -1.08310138 | -3.62106789 | -1.17829785 |
| C    | -1.48010813 | 2.75321249  | 0.53705207  |
| C    | -2.98144348 | 2.68426248  | 0.24986911  |
| H    | -1.11653312 | 3.79199126  | 0.47379666  |
| H    | -1.22207714 | 2.34657138  | 1.52712624  |
| N    | -3.43691944 | -1.28872918 | -0.22676136 |
| N    | -3.45029960 | 1.25785605  | 0.33781668  |
| H    | -3.52201675 | -3.41298849 | -0.54015678 |
| H    | -3.15474925 | -2.43129493 | -1.98994371 |
| C    | -4.61605490 | -0.61834420 | -0.87217173 |
| C    | -4.62180353 | 0.91142943  | -0.53710096 |
| H    | -4.50849103 | 1.48444815  | -1.46822500 |
| H    | -5.56586778 | 1.22210598  | -0.05277463 |
| H    | -4.50639114 | -0.74922749 | -1.95789762 |
| H    | -5.55459964 | -1.11105153 | -0.55837883 |
| C    | -3.71480568 | -1.59518779 | 1.21517375  |
| C    | -3.72983415 | 0.92269272  | 1.77329385  |
| H    | -2.77536327 | 0.97531147  | 2.31363961  |
| H    | -4.40617799 | 1.70162454  | 2.17443930  |
| H    | -4.38212091 | -2.47767480 | 1.24924357  |
| H    | -2.75833016 | -1.86259483 | 1.68381299  |
| C    | -4.39074348 | -0.44187241 | 1.95228817  |
| P    | 2.75996763  | -1.26136291 | -0.65029889 |
| P    | 2.73765651  | 1.43296275  | -0.04614968 |
| C    | 1.34326531  | 0.55075003  | -2.32172553 |
| N    | 1.48013556  | 0.82785010  | -3.47964004 |
| H    | -3.18360735 | 3.04745898  | -0.77038247 |
| H    | -3.55342077 | 3.31162528  | 0.95929412  |
| C    | 3.57077073  | 1.00342690  | 1.58189687  |
| C    | 3.70678379  | -1.48787209 | 0.96262039  |
| N    | 3.45177338  | -0.43396315 | 2.00031695  |
| H    | 3.09936375  | 1.59960927  | 2.37903342  |

|    |             |             |             |
|----|-------------|-------------|-------------|
| H  | 4.63896598  | 1.27028313  | 1.51795832  |
| H  | 3.40099829  | -2.44469031 | 1.41402829  |
| H  | 4.78693596  | -1.52329169 | 0.74550615  |
| C  | 4.31767245  | -0.68077613 | 3.19772523  |
| H  | 4.12929626  | -1.70067181 | 3.56126579  |
| H  | 4.05311892  | 0.04882851  | 3.97603218  |
| H  | 5.37383232  | -0.56747729 | 2.91233650  |
| C  | 4.12151592  | 1.07711670  | -1.25492894 |
| C  | 4.08557559  | -0.41953877 | -1.65579361 |
| C  | 2.63994810  | 3.25865717  | 0.07255635  |
| H  | 2.27663301  | 3.64045103  | -0.89458008 |
| H  | 3.62777223  | 3.69355492  | 0.29714391  |
| H  | 1.91966952  | 3.52927467  | 0.86038082  |
| C  | 2.66201810  | -2.98505139 | -1.26668489 |
| H  | 1.96375563  | -3.55365952 | -0.63258294 |
| H  | 3.65512003  | -3.46360601 | -1.25808135 |
| H  | 2.27262584  | -2.95790710 | -2.29656519 |
| H  | -4.38697264 | -0.67999136 | 3.02901035  |
| H  | -5.45215262 | -0.38311352 | 1.65751246  |
| H  | 3.81890722  | -0.54142065 | -2.71622545 |
| H  | 5.04936724  | -0.92415178 | -1.47933852 |
| H  | 5.07936222  | 1.36054368  | -0.78937239 |
| H  | 3.95775552  | 1.72708985  | -2.12850411 |
| O  | -1.05067715 | -0.55917286 | 2.45945334  |
| C  | 0.17583907  | -0.49735883 | 2.24697577  |
| H  | 0.51386109  | 0.15891436  | 1.35079533  |
| Fe | 1.05657420  | 0.14050269  | -0.57021811 |
| O  | 1.11847390  | -1.01613660 | 2.93749023  |
| H  | 2.42459889  | -0.61424442 | 2.35340591  |

**Name-NiFe4:**G=-2657.979634//H=-2857.738721/SPE=-2658.3431114  
Angstroms

| Atom | X           | Y           | Z           |
|------|-------------|-------------|-------------|
| S    | -0.47333400 | -1.49799700 | -1.71305300 |
| Ni   | -1.72874400 | -0.00026600 | -0.75951400 |
| Fe   | 1.06869300  | -0.00011100 | -0.78733200 |
| S    | -0.47347000 | 1.49690800  | -1.71417400 |
| C    | -1.08846200 | -2.88457100 | -0.62599800 |
| C    | -2.58678100 | -2.66594700 | -0.43242300 |
| H    | -0.54412600 | -2.90132600 | 0.32982500  |
| H    | -0.90658600 | -3.84050100 | -1.14188900 |
| C    | -1.08861500 | 2.88412100  | -0.62796200 |
| C    | -2.58691400 | 2.66558400  | -0.43418200 |
| H    | -0.90675200 | 3.83975300  | -1.14440700 |
| H    | -0.54423900 | 2.90140100  | 0.32782300  |
| N    | -2.84295600 | -1.30697500 | 0.16145000  |
| N    | -2.84300800 | 1.30699600  | 0.16058400  |
| H    | -3.02719200 | -3.45239100 | 0.20948300  |
| H    | -3.09176200 | -2.69928200 | -1.41024700 |
| C    | -4.22963000 | -0.78138200 | -0.08276800 |



|   |             |             |             |
|---|-------------|-------------|-------------|
| C | -4.22966700 | 0.78118400  | -0.08325000 |
| H | -4.53927600 | 1.14141000  | -1.07418900 |
| H | -4.93767600 | 1.19970600  | 0.65391300  |
| H | -4.53917500 | -1.14224000 | -1.07349600 |
| H | -4.93765200 | -1.19948100 | 0.65462500  |
| C | -2.50460200 | -1.28984100 | 1.62182100  |
| C | -2.50457700 | 1.29078700  | 1.62097400  |
| H | -1.41387900 | 1.44408600  | 1.70200400  |
| H | -2.99216200 | 2.15314600  | 2.11385500  |
| H | -2.99225000 | -2.15185900 | 2.11523500  |
| H | -1.41392400 | -1.44315700 | 1.70298700  |
| C | -2.93854600 | 0.00070500  | 2.31763700  |
| P | 2.37206000  | -1.39205600 | 0.26611400  |
| P | 2.37167900  | 1.39271700  | 0.26554300  |
| C | 2.30394500  | -0.00104100 | -2.13839100 |
| N | 3.09052600  | -0.00184900 | -3.03370800 |
| H | -3.09194600 | 2.69826100  | -1.41200400 |
| H | -3.02732800 | 3.45242600  | 0.20723200  |
| C | 2.00122600  | 1.27217700  | 2.12514400  |
| C | 2.00101400  | -1.27165200 | 2.12554600  |
| N | 1.22857800  | 0.00036900  | 2.42396000  |
| H | 1.36494300  | 2.11631300  | 2.43313000  |
| H | 2.90651800  | 1.27228500  | 2.75241000  |
| H | 1.36436100  | -2.11562000 | 2.43323600  |
| H | 2.90603100  | -1.27199000 | 2.75321300  |
| C | 0.67530800  | 0.00064700  | 3.82237600  |
| H | 0.06814200  | -0.90250100 | 3.97224200  |
| H | 0.06805800  | 0.90380600  | 3.97183900  |
| H | 1.51032400  | 0.00084600  | 4.53603600  |
| C | 4.12670600  | 0.77280700  | 0.19074600  |
| C | 4.12693700  | -0.77147800 | 0.19170500  |
| C | 2.52300400  | 3.19866800  | -0.00826500 |
| H | 2.75921300  | 3.34230900  | -1.07481700 |
| H | 3.33351200  | 3.62852000  | 0.60177400  |
| H | 1.58465000  | 3.72600700  | 0.21501600  |
| C | 2.52407500  | -3.19786500 | -0.00803300 |
| H | 1.58571800  | -3.72548300 | 0.21458200  |
| H | 3.33438900  | -3.62769600 | 0.60227700  |
| H | 2.76083900  | -3.34104100 | -1.07452800 |
| H | -2.53008300 | 0.00104000  | 3.34138300  |
| H | -4.03136000 | 0.00075500  | 2.45521600  |
| H | 4.54419000  | -1.15747100 | -0.75167800 |
| H | 4.71385100  | -1.19773800 | 1.02120600  |
| H | 4.71407700  | 1.20029800  | 1.01929000  |
| H | 4.54312600  | 1.15774000  | -0.75344100 |
| H | 0.43853000  | 0.00030300  | 1.73456800  |

Name-NiFe6:G= -2659.156846//H= -2659.065501//SPE=-2659.6394046

| Atom | Angstroms   |             |             |
|------|-------------|-------------|-------------|
|      | X           | Y           | Z           |
| S    | 0.66559490  | 1.52511479  | -1.32437362 |
| Ni   | 1.98947096  | -0.00670808 | -0.51179541 |
| Fe   | -0.96089732 | 0.00100048  | -0.43074392 |
| S    | 0.65221618  | -1.53230303 | -1.31577627 |
| C    | 1.38447172  | 2.86831269  | -0.25039716 |
| C    | 2.89458999  | 2.65681693  | -0.24799014 |
| H    | 0.95000463  | 2.85031481  | 0.76077692  |
| H    | 1.13432091  | 3.83941572  | -0.70697186 |
| C    | 1.34951158  | -2.86982579 | -0.22130382 |
| C    | 2.86229207  | -2.67879831 | -0.21651038 |
| H    | 1.08779269  | -3.84469275 | -0.66316144 |
| H    | 0.91284629  | -2.82968967 | 0.78830501  |
| N    | 3.21036387  | 1.28816021  | 0.28599682  |
| N    | 3.19495336  | -1.30776627 | 0.30141537  |
| H    | 3.41601800  | 3.42917698  | 0.34951877  |
| H    | 3.27187241  | 2.70893188  | -1.28140764 |
| C    | 4.55068455  | 0.76011534  | -0.13696388 |
| C    | 4.54165600  | -0.80119202 | -0.12725303 |
| H    | 4.71266250  | -1.17054267 | -1.14802104 |
| H    | 5.33665990  | -1.22061629 | 0.51591326  |
| H    | 4.72478468  | 1.11425703  | -1.16260698 |
| H    | 5.35135896  | 1.17837091  | 0.49989560  |
| C    | 3.06051726  | 1.27928733  | 1.78134619  |
| C    | 3.04785038  | -1.28033648 | 1.79682911  |
| H    | 1.97873663  | -1.40768518 | 2.02694973  |
| H    | 3.58605994  | -2.14945082 | 2.22032900  |
| H    | 3.60522364  | 2.14850624  | 2.19620182  |
| H    | 1.99171693  | 1.41785009  | 2.00693318  |
| C    | 3.58631522  | 0.00075709  | 2.42543713  |
| P    | -2.58846505 | 1.40637898  | -0.02960457 |
| P    | -2.63180507 | -1.36730675 | -0.09953459 |
| C    | -1.52848768 | 0.01280838  | -2.22122257 |
| N    | -1.88198950 | 0.01334381  | -3.35506490 |
| H    | 3.24245409  | -2.74937696 | -1.24779363 |
| H    | 3.37100805  | -3.45058125 | 0.39252738  |
| C    | -3.25336168 | -1.29177512 | 1.69011592  |
| C    | -3.21710462 | 1.25064289  | 1.75395431  |
| N    | -2.76952344 | -0.04416182 | 2.39907185  |
| H    | -2.86427692 | -2.15275861 | 2.25505656  |
| H    | -4.35290001 | -1.30389202 | 1.74990963  |
| H    | -2.80437586 | 2.07012333  | 2.36229174  |
| H    | -4.31600694 | 1.29217052  | 1.81509907  |
| C    | -3.11117509 | -0.07550669 | 3.86694224  |
| H    | -2.66928309 | 0.80224102  | 4.35717481  |
| H    | -2.70562363 | -0.99463379 | 4.31047518  |
| H    | -4.20356888 | -0.05596292 | 3.97546378  |
| C    | -4.12611572 | -0.70653685 | -1.00123666 |
| C    | -4.09468294 | 0.84166747  | -0.97239372 |
| C    | -2.59694328 | -3.16692295 | -0.43332148 |
| H    | -2.31616566 | -3.29616112 | -1.49075629 |

|   |             |             |             |
|---|-------------|-------------|-------------|
| H | -3.57930388 | -3.63446135 | -0.25924875 |
| H | -1.83869725 | -3.65848534 | 0.19486412  |
| C | -2.50626101 | 3.22193994  | -0.25352045 |
| H | -1.73705656 | 3.65482298  | 0.40384389  |
| H | -3.47645397 | 3.70274057  | -0.04984185 |
| H | -2.22196099 | 3.41167090  | -1.30066243 |
| H | -0.24806717 | 0.41295688  | 0.95753200  |
| H | -0.33576950 | -0.47407279 | 0.97661639  |
| H | 3.30188985  | 0.00876562  | 3.48991681  |
| H | 4.68822547  | -0.00464135 | 2.41750009  |
| H | -3.99202295 | 1.24181622  | -1.99271768 |
| H | -5.00375456 | 1.27594455  | -0.52594547 |
| H | -5.04487389 | -1.11957164 | -0.55436480 |
| H | -4.05695287 | -1.07269746 | -2.03674434 |
| H | -1.73847349 | -0.05511482 | 2.29124480  |

Name-NiFe7:G= -2848.298239//H= -2848.197683//SPE=-2848.7993808

Angstroms

| Atom | X           | Y           | Z           |
|------|-------------|-------------|-------------|
| S    | 0.64255506  | -2.25625469 | -0.88083138 |
| Ni   | 1.94257119  | -0.89338298 | 0.23533700  |
| Fe   | -0.94245359 | -0.86196270 | 0.25484838  |
| S    | 0.67182470  | -1.16074836 | 2.00291995  |
| C    | 1.27736070  | -1.70681301 | -2.54312478 |
| C    | 2.77881254  | -1.49715860 | -2.39758891 |
| H    | 0.74604833  | -0.80092728 | -2.87129789 |
| H    | 1.06996283  | -2.50832494 | -3.27031660 |
| C    | 1.34285162  | 0.35293067  | 2.85654816  |
| C    | 2.84235057  | 0.38687371  | 2.58702302  |
| H    | 1.14832729  | 0.25315184  | 3.93653567  |
| H    | 0.82149244  | 1.25306548  | 2.49622526  |
| N    | 3.04713320  | -0.49453171 | -1.31463199 |
| N    | 3.08604605  | 0.41932788  | 1.10746020  |
| H    | 3.23604047  | -1.15351761 | -3.34574041 |
| H    | 3.26005898  | -2.44273394 | -2.10136162 |
| C    | 4.43894063  | -0.56570565 | -0.75795659 |
| C    | 4.46108871  | -0.02086918 | 0.70215545  |
| H    | 4.75306348  | -0.83011044 | 1.38600806  |
| H    | 5.17861565  | 0.81076653  | 0.82575694  |
| H    | 4.72532065  | -1.62663897 | -0.75234603 |
| H    | 5.14124633  | -0.02401806 | -1.41714944 |
| C    | 2.71649674  | 0.88617316  | -1.80955046 |
| C    | 2.76841771  | 1.78916397  | 0.57586072  |
| H    | 1.68222056  | 1.92928993  | 0.67046871  |
| H    | 3.27292047  | 2.53450865  | 1.21932685  |
| H    | 3.18354484  | 1.01605084  | -2.80426208 |
| H    | 1.62376560  | 0.94505624  | -1.93003442 |
| C    | 3.20913980  | 1.97979523  | -0.87022137 |
| P    | -2.51613296 | -0.75591187 | -1.25141723 |
| P    | -2.52660094 | 0.18023468  | 1.33876741  |
| C    | -1.62477228 | -2.48868412 | 0.86351383  |

|   |             |             |             |
|---|-------------|-------------|-------------|
| N | -2.01587258 | -3.54543041 | 1.26018600  |
| H | 3.31377676  | -0.52673489 | 2.98264212  |
| H | 3.32105615  | 1.26385848  | 3.06444757  |
| C | -2.97671136 | 1.86073534  | 0.62710210  |
| C | -2.91250001 | 0.99652024  | -1.80018234 |
| N | -2.60210453 | 2.09106494  | -0.81370938 |
| H | -2.45414927 | 2.63616918  | 1.20861057  |
| H | -4.06374064 | 2.01153510  | 0.73127179  |
| H | -2.31948597 | 1.21758792  | -2.70167913 |
| H | -3.98337918 | 1.05105309  | -2.05572226 |
| C | -3.23074737 | 3.37247185  | -1.28553284 |
| H | -2.87781998 | 3.57689867  | -2.30578813 |
| H | -2.91753663 | 4.18248609  | -0.61223094 |
| H | -4.32418009 | 3.26266709  | -1.27218203 |
| C | -4.11170201 | -0.75287127 | 1.03342185  |
| C | -4.11895454 | -1.24979715 | -0.43376415 |
| C | -2.48597514 | 0.54613799  | 3.13235364  |
| H | -2.37181202 | -0.40793579 | 3.67040738  |
| H | -3.41797081 | 1.04330710  | 3.44792473  |
| H | -1.62152937 | 1.19144928  | 3.35225973  |
| C | -2.48659357 | -1.62107278 | -2.86609316 |
| H | -1.62940060 | -1.26319504 | -3.45707858 |
| H | -3.42342117 | -1.43853719 | -3.41820333 |
| H | -2.37269012 | -2.69992385 | -2.67631573 |
| H | 2.80151345  | 2.94086635  | -1.22395246 |
| H | 4.30613370  | 2.07072500  | -0.92872633 |
| H | -4.17652195 | -2.34830058 | -0.48310086 |
| H | -4.95920556 | -0.83342456 | -1.01258530 |
| H | -4.96742029 | -0.09582316 | 1.25783277  |
| H | -4.12768683 | -1.59582918 | 1.74087035  |
| H | -1.53589424 | 2.31291422  | -0.85771041 |
| O | 1.01265016  | 4.79278356  | -0.15258014 |
| O | -0.16112651 | 3.08759890  | -1.09320703 |
| C | 0.14466531  | 3.87295295  | -0.12127677 |
| H | -0.41079021 | 3.71456856  | 0.83875181  |
| H | -0.25223084 | 0.61009618  | 0.16487639  |
| H | -0.26712199 | 0.32008936  | -0.64055753 |

**Name-NiFe8:**G= -2847.134425//H= -2847.036735//SPE =-2847.6211889

Angstroms

| Atom | X           | Y           | Z           |
|------|-------------|-------------|-------------|
| S    | 0.52182158  | 1.67838777  | -1.17216091 |
| Ni   | 2.01298605  | 0.18187414  | -0.62794631 |
| Fe   | -1.04170037 | 0.00201788  | -0.64735509 |
| S    | 0.83046559  | -1.34909921 | -1.64932229 |
| C    | 1.01116378  | 2.81369327  | 0.21556300  |
| C    | 2.53561958  | 2.84303411  | 0.22162410  |
| H    | 0.58867052  | 2.44447220  | 1.16272725  |
| H    | 0.60542949  | 3.81911891  | 0.01597311  |
| C    | 1.84910423  | -2.75816541 | -0.96671556 |
| C    | 3.30385959  | -2.30146669 | -0.97660034 |

|   |             |             |             |
|---|-------------|-------------|-------------|
| H | 1.71983246  | -3.62418345 | -1.63640247 |
| H | 1.51099753  | -3.05766032 | 0.03733383  |
| N | 3.07057570  | 1.45247531  | 0.40877595  |
| N | 3.45698968  | -1.05131281 | -0.16026900 |
| H | 2.92834102  | 3.50615016  | 1.01647687  |
| H | 2.90084262  | 3.21445351  | -0.74896533 |
| C | 4.45211705  | 1.25436812  | -0.14049147 |
| C | 4.67066287  | -0.24311534 | -0.51411430 |
| H | 4.80729066  | -0.32851145 | -1.60121960 |
| H | 5.56468253  | -0.66627617 | -0.01982329 |
| H | 4.52579965  | 1.86521752  | -1.05074577 |
| H | 5.20673033  | 1.61965458  | 0.57968785  |
| C | 2.98732811  | 1.07000285  | 1.86190785  |
| C | 3.45543270  | -1.39601260 | 1.29845714  |
| H | 2.47277691  | -1.82064436 | 1.54072347  |
| H | 4.21470900  | -2.18451103 | 1.46409531  |
| H | 3.39488636  | 1.90675185  | 2.46075448  |
| H | 1.92132319  | 0.95629880  | 2.11044289  |
| C | 3.76928875  | -0.19881142 | 2.19228763  |
| P | -2.74541796 | 1.31973958  | -0.29942396 |
| P | -2.62599823 | -1.44012072 | -0.17510613 |
| C | -1.52625667 | 0.06004135  | -2.41944470 |
| N | -1.80932433 | 0.11221494  | -3.58458452 |
| H | 3.61055892  | -2.06385248 | -2.00755043 |
| H | 3.97702550  | -3.08873213 | -0.58363031 |
| C | -3.20262553 | -1.22294410 | 1.61808256  |
| C | -3.35568186 | 1.31169195  | 1.48047030  |
| N | -2.83720170 | 0.11148603  | 2.22015947  |
| H | -2.71704730 | -1.99109415 | 2.24009432  |
| H | -4.29550556 | -1.34377208 | 1.69087579  |
| H | -2.96368613 | 2.19928455  | 1.99985170  |
| H | -4.45612028 | 1.31127748  | 1.53063253  |
| C | -3.21155453 | 0.16151616  | 3.66963215  |
| H | -2.85794117 | 1.11431371  | 4.08668964  |
| H | -2.72581192 | -0.67933133 | 4.18323043  |
| H | -4.30466778 | 0.08657721  | 3.75724673  |
| C | -4.16290565 | -0.94618247 | -1.10561247 |
| C | -4.23264232 | 0.59939289  | -1.17337620 |
| C | -2.54625776 | -3.27023750 | -0.29103820 |
| H | -2.31473466 | -3.53381976 | -1.33520243 |
| H | -3.50344812 | -3.72961170 | 0.00645276  |
| H | -1.73608369 | -3.63673157 | 0.35873169  |
| C | -2.76873141 | 3.10850878  | -0.69902068 |
| H | -2.02414114 | 3.63132328  | -0.07899735 |
| H | -3.77045554 | 3.53107837  | -0.51616456 |
| H | -2.50490626 | 3.22701910  | -1.76166442 |
| H | 3.53088110  | -0.47993120 | 3.23150177  |
| H | 4.85145955  | 0.01210259  | 2.17185131  |
| H | -4.19546135 | 0.95400531  | -2.21450128 |
| H | -5.14694955 | 0.99756607  | -0.70464638 |
| H | -5.04460460 | -1.38525291 | -0.61104334 |
| H | -4.07901092 | -1.38546017 | -2.11237739 |

|   |             |             |            |
|---|-------------|-------------|------------|
| H | -1.78384476 | 0.17927206  | 2.13545699 |
| O | 0.32967163  | -1.28848645 | 3.10762206 |
| O | -0.33934399 | -0.06155743 | 1.33304491 |
| C | 0.06016661  | -1.16990291 | 1.88703680 |
| H | 0.12900987  | -2.05056117 | 1.21172050 |

**Name-NiFe9:**G= -2847.838218//H= -2847.736889//SPE=-2848.3270148

Angstroms

| Atom | X           | Y           | Z           |
|------|-------------|-------------|-------------|
| S    | 0.49891282  | -2.26858765 | -1.06586123 |
| Ni   | 1.78422933  | -0.98798793 | 0.17054073  |
| Fe   | -1.03038538 | -0.96101021 | 0.21994049  |
| S    | 0.55583895  | -1.44360556 | 1.93414627  |
| C    | 1.14545981  | -1.54226404 | -2.65337284 |
| C    | 2.65267324  | -1.39232785 | -2.50396768 |
| H    | 0.64568147  | -0.58182256 | -2.85461153 |
| H    | 0.90838525  | -2.23321683 | -3.47941811 |
| C    | 1.25614662  | -0.01619868 | 2.90204818  |
| C    | 2.75603077  | 0.01694442  | 2.64302361  |
| H    | 1.05558628  | -0.18414956 | 3.97327078  |
| H    | 0.75525459  | 0.91716746  | 2.60082955  |
| N    | 2.95450522  | -0.51127902 | -1.32870961 |
| N    | 3.00693290  | 0.16933897  | 1.17233485  |
| H    | 3.11955132  | -0.97108986 | -3.41640631 |
| H    | 3.10382337  | -2.37797016 | -2.30645364 |
| C    | 4.32682034  | -0.71990631 | -0.76266669 |
| C    | 4.35716747  | -0.31326291 | 0.74014973  |
| H    | 4.59134946  | -1.19805770 | 1.34871841  |
| H    | 5.12343534  | 0.45682326  | 0.94778198  |
| H    | 4.54985531  | -1.79236560 | -0.85000270 |
| H    | 5.07496859  | -0.16529136 | -1.35934284 |
| C    | 2.73256133  | 0.92726642  | -1.70126344 |
| C    | 2.78231633  | 1.59748266  | 0.76927371  |
| H    | 1.70402114  | 1.79243913  | 0.86411696  |
| H    | 3.32088840  | 2.25001207  | 1.48319795  |
| H    | 3.24403784  | 1.11824745  | -2.66459356 |
| H    | 1.65099577  | 1.06910191  | -1.84765099 |
| C    | 3.26478059  | 1.89426916  | -0.64795957 |
| P    | -2.48858558 | -0.52224399 | -1.28913575 |
| P    | -2.44920952 | 0.20003965  | 1.32986858  |
| C    | -1.86757335 | -2.59278884 | 0.67838052  |
| N    | -2.37027081 | -3.64479009 | 0.97379148  |
| H    | 3.20764362  | -0.93597771 | 2.96195315  |
| H    | 3.25318688  | 0.84011259  | 3.19362806  |
| C    | -2.67055930 | 1.98619031  | 0.76788028  |
| C    | -2.70081793 | 1.29855499  | -1.72100425 |
| N    | -2.27373535 | 2.27722110  | -0.65728387 |

|   |             |             |             |
|---|-------------|-------------|-------------|
| H | -2.03664933 | 2.63314341  | 1.39485035  |
| H | -3.72271199 | 2.28861626  | 0.89515898  |
| H | -2.08380378 | 1.52328429  | -2.60540777 |
| H | -3.75641870 | 1.50018097  | -1.96523444 |
| C | -2.75683034 | 3.65045770  | -1.03180532 |
| H | -2.37690109 | 3.89415153  | -2.03347132 |
| H | -2.37229205 | 4.37308206  | -0.29898439 |
| H | -3.85586411 | 3.65254367  | -1.02833975 |
| C | -4.16247856 | -0.45615409 | 0.93078175  |
| C | -4.18279077 | -0.87097819 | -0.56147672 |
| C | -2.48072964 | 0.46433847  | 3.15384470  |
| H | -2.50395385 | -0.52226357 | 3.64320125  |
| H | -3.37015911 | 1.04408486  | 3.45300451  |
| H | -1.56912023 | 0.99690857  | 3.46649610  |
| C | -2.57294955 | -1.23790722 | -2.98483201 |
| H | -1.67271938 | -0.95447870 | -3.55191584 |
| H | -3.47335217 | -0.88607358 | -3.51588116 |
| H | -2.60563856 | -2.33480864 | -2.89033001 |
| H | 2.92978309  | 2.90901427  | -0.91643072 |
| H | 4.36702548  | 1.91785525  | -0.67568073 |
| H | -4.35578571 | -1.95328270 | -0.67293173 |
| H | -4.95947775 | -0.33869920 | -1.13539178 |
| H | -4.92267122 | 0.30762030  | 1.16465458  |
| H | -4.33179537 | -1.32210955 | 1.59043807  |
| H | -1.20740026 | 2.36240437  | -0.69117451 |
| O | 1.40334548  | 4.93076189  | 0.02768898  |
| O | 0.23610437  | 3.24590230  | -0.96018613 |
| C | 0.53700856  | 4.00298833  | 0.02853498  |
| H | -0.01738061 | 3.81882654  | 0.98575265  |
| H | -0.22391721 | 0.33714475  | -0.13891207 |

**Name-NiFe10:**G= -2658.262595//H= -2658.164616//SPE =-2658.7142401  
Angstroms

| Atom | X           | Y           | Z           |
|------|-------------|-------------|-------------|
| S    | -0.62723009 | -1.55040857 | -1.72511826 |
| Ni   | -1.77100021 | 0.00129062  | -0.65524409 |
| Fe   | 0.95188917  | 0.00166742  | -0.82254346 |
| S    | -0.62714037 | 1.55804828  | -1.71773127 |
| C    | -1.19423937 | -2.88600489 | -0.55669027 |
| C    | -2.66850689 | -2.66225858 | -0.25547240 |
| H    | -0.58067001 | -2.85607121 | 0.35636337  |
| H    | -1.04659351 | -3.86632181 | -1.03964960 |
| C    | -1.19554954 | 2.88869304  | -0.54437719 |
| C    | -2.66985251 | 2.66273537  | -0.24496241 |
| H    | -1.04831614 | 3.87091842  | -1.02356775 |
| H    | -0.58259914 | 2.85596571  | 0.36901690  |
| N    | -2.86070092 | -1.29792706 | 0.33480785  |
| N    | -2.86131118 | 1.29604276  | 0.34003001  |
| H    | -3.06760260 | -3.42942088 | 0.43812629  |

|   |             |             |             |
|---|-------------|-------------|-------------|
| H | -3.24882865 | -2.70374146 | -1.19092661 |
| C | -4.25749890 | -0.77873067 | 0.18558089  |
| C | -4.25781875 | 0.77673008  | 0.18860218  |
| H | -4.63253384 | 1.13725887  | -0.77944311 |
| H | -4.90699109 | 1.19184667  | 0.98237764  |
| H | -4.63231932 | -1.13569196 | -0.78374916 |
| H | -4.90628310 | -1.19716003 | 0.97793043  |
| C | -2.43743860 | -1.29514153 | 1.77492224  |
| C | -2.43798809 | 1.28785587  | 1.78001300  |
| H | -1.35087357 | 1.45272019  | 1.80268344  |
| H | -2.92845843 | 2.14035969  | 2.28989038  |
| H | -2.92764916 | -2.14979095 | 2.28145184  |
| H | -1.35027519 | -1.45979117 | 1.79694827  |
| C | -2.81584825 | -0.00514403 | 2.50308572  |
| P | 2.32487892  | -1.35122506 | 0.15369539  |
| P | 2.32511550  | 1.35006873  | 0.15951026  |
| C | 1.88732164  | 0.00654173  | -2.46264922 |
| N | 2.45367652  | 0.01019471  | -3.52638167 |
| H | -3.24955494 | 2.70719533  | -1.18065362 |
| H | -3.06998788 | 3.42699961  | 0.45124572  |
| C | 2.37834711  | 1.22882185  | 2.04528966  |
| C | 2.37805110  | -1.23728863 | 2.04002388  |
| N | 1.79907922  | -0.00529516 | 2.58865457  |
| H | 1.80034798  | 2.08101962  | 2.44500885  |
| H | 3.44035851  | 1.37260193  | 2.35888937  |
| H | 1.79977253  | -2.09099005 | 2.43615183  |
| H | 3.44000341  | -1.38269535 | 2.35309383  |
| C | 1.91041439  | -0.00838466 | 4.05109879  |
| H | 1.41393685  | -0.90391025 | 4.46104448  |
| H | 1.41390590  | 0.88540874  | 4.46478525  |
| H | 2.96889779  | -0.00908043 | 4.40140973  |
| C | 4.06245917  | 0.77339890  | -0.25975324 |
| C | 4.06225116  | -0.77311085 | -0.26339245 |
| C | 2.44848982  | 3.17961369  | -0.06729530 |
| H | 2.54681038  | 3.39325647  | -1.14355674 |
| H | 3.32986122  | 3.57548797  | 0.46596571  |
| H | 1.54211432  | 3.67446057  | 0.31301926  |
| C | 2.44841962  | -3.17998867 | -0.07963485 |
| H | 1.54235990  | -3.67630557 | 0.29952359  |
| H | 3.33015269  | -3.57741506 | 0.45186066  |
| H | 2.54619455  | -3.38999326 | -1.15665460 |
| H | -2.30496539 | -0.00696864 | 3.48037811  |
| H | -3.89649972 | -0.00583139 | 2.72440394  |
| H | 4.30182625  | -1.17432196 | -1.26159771 |
| H | 4.78157940  | -1.19737044 | 0.45786234  |
| H | 4.78158083  | 1.19400958  | 0.46384814  |
| H | 4.30269163  | 1.17921364  | -1.25593186 |
| H | 0.04622196  | -0.00136647 | 0.44681397  |

Name-NiFe11:G= -2846.674126//H= -2846.574349//SPE =-2847.1425713



|      | Angstroms   |             |             |
|------|-------------|-------------|-------------|
| Atom | X           | Y           | Z           |
| S    | -0.72618054 | -1.58428196 | -1.36722705 |
| Ni   | -2.04115826 | -0.02698413 | -0.59530918 |
| S    | -0.72700409 | 1.46182054  | -1.50211477 |
| C    | -1.40363807 | -2.86051847 | -0.19192117 |
| C    | -2.92008584 | -2.68639275 | -0.21842652 |
| H    | -0.97714610 | -2.71970156 | 0.81288236  |
| H    | -1.12255282 | -3.86245886 | -0.55569550 |
| C    | -1.40590570 | 2.82991815  | -0.43649112 |
| C    | -2.92245262 | 2.65412714  | -0.44451327 |
| H    | -1.12721136 | 3.79853574  | -0.88308763 |
| H    | -0.97679169 | 2.77439908  | 0.57548824  |
| N    | -3.28358466 | -1.29541409 | 0.21879848  |
| N    | -3.28536893 | 1.30453696  | 0.10771561  |
| H    | -3.42417330 | -3.42701632 | 0.43180295  |
| H    | -3.29079790 | -2.82083551 | -1.24711591 |
| C    | -4.59229977 | -0.79875768 | -0.32316472 |
| C    | -4.59186740 | 0.76183458  | -0.39355426 |
| H    | -4.68717501 | 1.07515348  | -1.44256377 |
| H    | -5.43184375 | 1.20150845  | 0.17516626  |
| H    | -4.69455453 | -1.20532624 | -1.33898002 |
| H    | -5.42913367 | -1.18494080 | 0.28736387  |
| C    | -3.24993427 | -1.21581596 | 1.71808293  |
| C    | -3.25788382 | 1.35414494  | 1.60762261  |
| H    | -2.21733846 | 1.52886761  | 1.91533231  |
| H    | -3.86226147 | 2.22449262  | 1.92837197  |
| H    | -3.84623983 | -2.05913315 | 2.11676225  |
| H    | -2.20585298 | -1.35316448 | 2.03326920  |
| C    | -3.82071635 | 0.09291887  | 2.25747431  |
| P    | 2.59752207  | -1.39418856 | -0.18704476 |
| P    | 2.60436309  | 1.35489209  | -0.32405835 |
| C    | 1.46960204  | -0.11402873 | -2.48556651 |
| N    | 1.75230693  | -0.16508976 | -3.65179054 |
| H    | -3.29525234 | 2.70300876  | -1.47995892 |
| H    | -3.42446400 | 3.44641042  | 0.14351962  |
| N    | 3.91504553  | 0.08016426  | 1.80849595  |
| C    | 4.31381723  | 0.14998245  | 3.22328901  |
| H    | 3.43829057  | 0.19203628  | 3.90954755  |
| H    | 4.92863092  | 1.04963316  | 3.39108358  |
| H    | 4.91560241  | -0.73651978 | 3.48287856  |
| C    | 4.12006358  | 0.70552452  | -1.20289018 |
| C    | 4.11581120  | -0.84488013 | -1.12489030 |
| C    | 2.51547183  | 3.15083226  | -0.69470587 |
| H    | 2.18826094  | 3.27747014  | -1.73867203 |
| H    | 3.49734423  | 3.63025633  | -0.54863601 |
| H    | 1.77199267  | 3.61687830  | -0.02857176 |
| C    | 2.49779553  | -3.21839651 | -0.36676326 |
| H    | 1.76129068  | -3.60913454 | 0.35356785  |
| H    | 3.48003949  | -3.68380790 | -0.18180796 |
| H    | 2.15826753  | -3.45350343 | -1.38767278 |
| H    | -3.59682891 | 0.14015806  | 3.33614138  |

|    |             |             |             |
|----|-------------|-------------|-------------|
| H  | -4.92038040 | 0.08627906  | 2.17283665  |
| H  | 4.05468280  | -1.29464669 | -2.12841811 |
| H  | 5.01319360  | -1.24065744 | -0.62282034 |
| H  | 5.01935659  | 1.14368021  | -0.74101545 |
| H  | 4.06303057  | 1.05234271  | -2.24650446 |
| O  | -0.02103381 | -0.98877591 | 2.76404070  |
| C  | 0.03041763  | 0.14377439  | 2.20926249  |
| H  | 0.06535082  | 0.13094854  | 1.04587767  |
| Fe | 0.96352878  | -0.03572399 | -0.74389875 |
| O  | 0.00727812  | 1.29604896  | 2.72540918  |
| C  | 3.17035568  | -1.17319955 | 1.58336679  |
| H  | 2.27536615  | -1.27486049 | 2.23198340  |
| H  | 3.85061349  | -2.01240222 | 1.81367701  |
| C  | 3.19498967  | 1.31805361  | 1.45413010  |
| H  | 3.89769672  | 2.16105873  | 1.57982867  |
| H  | 2.31435819  | 1.51590823  | 2.09999751  |

**Name-TS12:** G= -2658.721708//H= -2658.632236//SPE =-2659.1912338

Angstroms

| Atom | X           | Y           | Z           |
|------|-------------|-------------|-------------|
| S    | -0.49129764 | -1.55824554 | -1.71000653 |
| Ni   | -1.73296377 | -0.00278833 | -0.77092650 |
| Fe   | 1.04003261  | -0.01183698 | -0.70481592 |
| S    | -0.48084638 | 1.53383002  | -1.72870681 |
| C    | -1.13578167 | -2.89683287 | -0.58547984 |
| C    | -2.62363443 | -2.65804048 | -0.37415749 |
| H    | -0.57422491 | -2.88417853 | 0.36059668  |
| H    | -0.96817720 | -3.87127002 | -1.07236442 |
| C    | -1.11170307 | 2.88688597  | -0.61338387 |
| C    | -2.60140011 | 2.66324240  | -0.39662406 |
| H    | -0.93737336 | 3.85609084  | -1.10835520 |
| H    | -0.54773640 | 2.87733331  | 0.33144820  |
| N    | -2.83644967 | -1.28860441 | 0.19877482  |
| N    | -2.82648232 | 1.30065067  | 0.18803738  |
| H    | -3.06636101 | -3.41742603 | 0.30016973  |
| H    | -3.15062681 | -2.69994079 | -1.34049983 |
| C    | -4.22856176 | -0.76751491 | 0.00377571  |
| C    | -4.22244630 | 0.78869620  | -0.00380941 |
| H    | -4.56410633 | 1.14519795  | -0.98546831 |
| H    | -4.89120435 | 1.21288805  | 0.76747935  |
| H    | -4.57399880 | -1.13074388 | -0.97409086 |
| H    | -4.89971848 | -1.17940349 | 0.77958967  |
| C    | -2.45154546 | -1.27457451 | 1.65190527  |
| C    | -2.44488399 | 1.29690052  | 1.64212433  |
| H    | -1.35620342 | 1.44521861  | 1.69994638  |
| H    | -2.93757696 | 2.16117800  | 2.12765455  |
| H    | -2.94596389 | -2.13326443 | 2.14550173  |
| H    | -1.36303492 | -1.42542877 | 1.70843929  |
| C    | -2.86219054 | 0.01486333  | 2.35953895  |
| P    | 2.39302375  | -1.39464962 | 0.28998137  |

|   |             |             |             |
|---|-------------|-------------|-------------|
| P | 2.41413178  | 1.38220477  | 0.24252934  |
| C | 2.04520775  | -0.03121207 | -2.26487074 |
| N | 2.67798146  | -0.04079214 | -3.28512711 |
| H | -3.13017968 | 2.70253906  | -1.36208325 |
| H | -3.03538542 | 3.43227502  | 0.27244422  |
| C | 2.13342968  | 1.27430289  | 2.11381617  |
| C | 2.13250538  | -1.19949815 | 2.15918042  |
| N | 1.38276523  | 0.04256818  | 2.41142090  |
| H | 1.51368740  | 2.13558586  | 2.41175830  |
| H | 3.09751637  | 1.31525267  | 2.65465274  |
| H | 1.52000106  | -2.04798722 | 2.50457739  |
| H | 3.10429261  | -1.21351253 | 2.68734027  |
| C | 0.68237516  | 0.06673444  | 3.70685592  |
| H | 0.04821239  | -0.82958185 | 3.78743941  |
| H | 0.04638086  | 0.96404785  | 3.75312650  |
| H | 1.39371663  | 0.08335443  | 4.55339872  |
| C | 4.16036540  | 0.74731436  | 0.05496757  |
| C | 4.14738018  | -0.79822861 | 0.06624326  |
| C | 2.56838479  | 3.18741188  | -0.06015635 |
| H | 2.78659981  | 3.34162084  | -1.12878514 |
| H | 3.38789086  | 3.60747231  | 0.54668690  |
| H | 1.62562680  | 3.69536075  | 0.19223595  |
| C | 2.51772181  | -3.21406387 | 0.06657263  |
| H | 1.57422203  | -3.69778614 | 0.36004244  |
| H | 3.34355162  | -3.61650259 | 0.67676747  |
| H | 2.71315804  | -3.42061344 | -0.99763403 |
| H | -0.08183309 | 0.00380056  | 0.48551573  |
| H | 0.52811792  | 0.02167492  | 1.22225564  |
| H | -2.39299740 | 0.01724752  | 3.35710255  |
| H | -3.95087388 | 0.01833473  | 2.53466801  |
| H | 4.50314570  | -1.20962342 | -0.89208455 |
| H | 4.77376434  | -1.21735398 | 0.87142508  |
| H | 4.78089647  | 1.16772852  | 0.86403795  |
| H | 4.53986442  | 1.13849576  | -0.90275933 |

**Name-TS23:** G = -2847.097309 // H = -2846.999793 // SPE = -2847.5785483  
 Angstroms

| Atom | X          | Y           | Z           |
|------|------------|-------------|-------------|
| S    | 0.51177308 | 2.00338689  | -0.46365287 |
| Ni   | 1.95331400 | 0.36747535  | -0.54871373 |
| S    | 0.64150514 | -0.68551815 | -1.94557815 |
| C    | 1.20191613 | 2.61895240  | 1.15030302  |
| C    | 2.71771397 | 2.63349459  | 0.97147693  |
| H    | 0.87787307 | 1.96941694  | 1.97843663  |
| H    | 0.82362939 | 3.63805236  | 1.33567638  |
| C    | 1.52553368 | -2.30290370 | -1.68115954 |
| C    | 3.01629557 | -1.97966264 | -1.71495188 |
| H    | 1.26227555 | -2.98361091 | -2.50783022 |
| H    | 1.21450966 | -2.76863497 | -0.73501866 |

|   |             |             |             |
|---|-------------|-------------|-------------|
| N | 3.20323063  | 1.24244305  | 0.67754155  |
| N | 3.35009859  | -1.00597430 | -0.62124649 |
| H | 3.23345226  | 3.02906120  | 1.86759695  |
| H | 2.98147618  | 3.27120234  | 0.11262416  |
| C | 4.47589084  | 1.18467086  | -0.11361284 |
| C | 4.56250199  | -0.16385852 | -0.89542769 |
| H | 4.56974566  | 0.04525443  | -1.97420009 |
| H | 5.48169309  | -0.72660510 | -0.64839161 |
| H | 4.44609544  | 2.01612660  | -0.83175995 |
| H | 5.34738987  | 1.33466564  | 0.55004806  |
| C | 3.32673577  | 0.48075477  | 1.96498897  |
| C | 3.49284096  | -1.74286280 | 0.67768616  |
| H | 2.51171468  | -2.16764300 | 0.92830031  |
| H | 4.19173304  | -2.58620878 | 0.51665339  |
| H | 3.90548529  | 1.10260251  | 2.67484693  |
| H | 2.31326026  | 0.35310655  | 2.36822357  |
| C | 4.02940825  | -0.86434577 | 1.80440707  |
| P | -2.78548558 | 1.36214958  | 0.27849855  |
| P | -2.67034289 | -1.21496302 | -0.71105365 |
| C | -1.58133012 | 1.05314299  | -2.20168203 |
| N | -1.85130363 | 1.55872434  | -3.25587973 |
| H | 3.27133051  | -1.50332816 | -2.67511911 |
| H | 3.63423790  | -2.89190114 | -1.60458481 |
| C | -3.27128278 | -1.72736928 | 1.01191161  |
| C | -3.37578634 | 0.62476055  | 1.91371184  |
| N | -2.79228872 | -0.74970270 | 2.04987429  |
| H | -2.83021860 | -2.70358810 | 1.26408377  |
| H | -4.36903858 | -1.79066165 | 1.06614577  |
| H | -2.98510268 | 1.22849225  | 2.74685645  |
| H | -4.47259038 | 0.55746723  | 1.97744667  |
| C | -2.91113327 | -1.28987846 | 3.43884885  |
| H | -2.46707384 | -0.56474993 | 4.13441694  |
| H | -2.37354451 | -2.24712192 | 3.49139851  |
| H | -3.97532308 | -1.43914842 | 3.66911100  |
| C | -4.21247486 | -0.39383099 | -1.37080591 |
| C | -4.28854403 | 1.04328378  | -0.79538426 |
| C | -2.56097509 | -2.84366501 | -1.55057830 |
| H | -2.35333831 | -2.66726974 | -2.61780906 |
| H | -3.50014147 | -3.41170860 | -1.44428741 |
| H | -1.72618882 | -3.41366869 | -1.11260122 |
| C | -2.82477030 | 3.16257169  | 0.62987160  |
| H | -2.05066818 | 3.40453420  | 1.37469731  |
| H | -3.81604031 | 3.46509923  | 1.00567104  |
| H | -2.60423960 | 3.69922389  | -0.30640424 |
| H | 3.91841386  | -1.41827245 | 2.75127912  |
| H | 5.11208225  | -0.70555816 | 1.66752953  |
| H | -4.26954813 | 1.79502791  | -1.59948044 |
| H | -5.19841240 | 1.20458381  | -0.19429095 |
| H | -5.09475414 | -0.99945342 | -1.10592822 |
| H | -4.12182195 | -0.37829549 | -2.46850353 |
| O | 0.48795577  | -0.94365621 | 2.87630487  |
| C | 0.19582009  | -1.65102531 | 1.95065306  |

|    |             |             |             |
|----|-------------|-------------|-------------|
| H  | -0.53957004 | -0.43463350 | 0.81790035  |
| Fe | -1.10671709 | 0.28265552  | -0.56941078 |
| O  | 0.06380525  | -2.68365024 | 1.35496704  |
| H  | -1.77436424 | -0.59726247 | 1.78821157  |

**Name-TS71**:G=-2848.289993//H=-2848.014352//SPE=-2848.79409276

Angstroms

| Atom | X           | Y           | Z           |
|------|-------------|-------------|-------------|
| S    | 0.68603000  | -2.21654000 | -1.05654000 |
| Ni   | 1.91597000  | -0.92456000 | 0.21424000  |
| Fe   | -0.93966000 | -0.92819000 | 0.16707000  |
| S    | 0.61042000  | -1.38925000 | 1.91544000  |
| C    | 1.39757000  | -1.54975000 | -2.64411000 |
| C    | 2.88509000  | -1.32604000 | -2.40805000 |
| H    | 0.87005000  | -0.63280000 | -2.94684000 |
| H    | 1.24372000  | -2.30780000 | -3.42898000 |
| C    | 1.18497000  | 0.08135000  | 2.90472000  |
| C    | 2.68942000  | 0.20117000  | 2.69301000  |
| H    | 0.95967000  | -0.10574000 | 3.96706000  |
| H    | 0.63538000  | 0.98239000  | 2.59068000  |
| N    | 3.08023000  | -0.39228000 | -1.24924000 |
| N    | 2.98785000  | 0.34581000  | 1.22931000  |
| H    | 3.38261000  | -0.91383000 | -3.30753000 |
| H    | 3.36905000  | -2.28088000 | -2.14852000 |
| C    | 4.44526000  | -0.48274000 | -0.63209000 |
| C    | 4.39128000  | -0.03161000 | 0.85797000  |
| H    | 4.67706000  | -0.87447000 | 1.50298000  |
| H    | 5.07831000  | 0.80881000  | 1.06577000  |
| H    | 4.74548000  | -1.53875000 | -0.67850000 |
| H    | 5.16966000  | 0.10776000  | -1.22209000 |
| C    | 2.75691000  | 1.01494000  | -1.66918000 |
| C    | 2.66408000  | 1.74404000  | 0.78465000  |
| H    | 1.57301000  | 1.86824000  | 0.84943000  |
| H    | 3.13524000  | 2.44647000  | 1.49793000  |
| H    | 3.29306000  | 1.22011000  | -2.61536000 |
| H    | 1.67533000  | 1.06427000  | -1.86872000 |
| C    | 3.16266000  | 2.04931000  | -0.62487000 |
| P    | -2.39350000 | -0.52981000 | -1.42674000 |
| P    | -2.59733000 | -0.07655000 | 1.28466000  |
| C    | -1.67788000 | -2.59204000 | 0.57078000  |
| N    | -2.12244000 | -3.66009000 | 0.87064000  |
| H    | 3.19093000  | -0.71385000 | 3.04566000  |
| H    | 3.10805000  | 1.06452000  | 3.24593000  |
| C    | -2.71714000 | 1.75857000  | 1.02330000  |
| C    | -2.91021000 | 1.28290000  | -1.54769000 |
| N    | -2.53765000 | 2.20628000  | -0.41315000 |
| H    | -1.90755000 | 2.23910000  | 1.59637000  |
| H    | -3.68621000 | 2.12634000  | 1.39782000  |
| H    | -2.42904000 | 1.71319000  | -2.44005000 |
| H    | -4.00282000 | 1.32473000  | -1.68718000 |

|   |             |             |             |
|---|-------------|-------------|-------------|
| C | -3.23943000 | 3.52020000  | -0.60769000 |
| H | -2.98850000 | 3.90585000  | -1.60542000 |
| H | -2.88445000 | 4.21913000  | 0.16243000  |
| H | -4.32409000 | 3.36719000  | -0.51527000 |
| C | -4.22875000 | -0.67879000 | 0.56557000  |
| C | -4.00315000 | -1.24656000 | -0.85251000 |
| C | -2.76861000 | -0.20869000 | 3.10446000  |
| H | -2.54314000 | -1.24645000 | 3.39487000  |
| H | -3.79330000 | 0.05169000  | 3.41533000  |
| H | -2.04614000 | 0.46715000  | 3.58877000  |
| C | -2.19726000 | -0.97254000 | -3.19324000 |
| H | -1.35788000 | -0.40393000 | -3.62176000 |
| H | -3.12392000 | -0.75211000 | -3.74824000 |
| H | -1.97310000 | -2.04916000 | -3.25468000 |
| H | 2.74014000  | 3.02116000  | -0.92754000 |
| H | 4.25763000  | 2.17657000  | -0.62103000 |
| H | -3.88523000 | -2.33990000 | -0.83188000 |
| H | -4.82100000 | -0.98856000 | -1.54478000 |
| H | -4.91458000 | 0.18470000  | 0.54412000  |
| H | -4.65132000 | -1.43013000 | 1.25159000  |
| H | -1.24764000 | 2.66119000  | -0.54434000 |
| O | 1.08594000  | 4.91350000  | -0.19280000 |
| O | -0.13481000 | 3.13810000  | -0.92100000 |
| C | 0.17393000  | 4.04834000  | -0.06327000 |
| H | -0.42603000 | 4.05806000  | 0.88256000  |
| H | -0.34714000 | 0.56860000  | 0.34697000  |
| H | -0.13347000 | 0.35699000  | -0.45309000 |

**Name-TS910:**G= -2847.830525//H= -2847.734074//SPE=-2848.3233153

Angstroms

| Atom | X           | Y           | Z           |
|------|-------------|-------------|-------------|
| S    | 0.52541000  | -2.16712000 | -1.11793000 |
| Ni   | 1.81129000  | -0.90173000 | 0.13393000  |
| Fe   | -0.99803000 | -0.87333000 | 0.18813000  |
| S    | 0.59035000  | -1.39138000 | 1.89286000  |
| C    | 1.16988000  | -1.41671000 | -2.69542000 |
| C    | 2.67736000  | -1.26867000 | -2.54601000 |
| H    | 0.66991000  | -0.45313000 | -2.88048000 |
| H    | 0.93147000  | -2.09472000 | -3.53172000 |
| C    | 1.28426000  | 0.02524000  | 2.88175000  |
| C    | 2.78320000  | 0.07224000  | 2.61976000  |
| H    | 1.09024000  | -0.16121000 | 3.95120000  |
| H    | 0.77329000  | 0.95844000  | 2.59642000  |
| N    | 2.98042000  | -0.40368000 | -1.35901000 |
| N    | 3.03255000  | 0.24388000  | 1.15092000  |
| H    | 3.14272000  | -0.83458000 | -3.45317000 |
| H    | 3.12917000  | -2.25684000 | -2.36325000 |
| C    | 4.35234000  | -0.62103000 | -0.79526000 |
| C    | 4.38303000  | -0.23243000 | 0.71224000  |
| H    | 4.61804000  | -1.12432000 | 1.31002000  |

|   |             |             |             |
|---|-------------|-------------|-------------|
| H | 5.14892000  | 0.53550000  | 0.92894000  |
| H | 4.57367000  | -1.69277000 | -0.89511000 |
| H | 5.10147000  | -0.06042000 | -1.38511000 |
| C | 2.76115000  | 1.03995000  | -1.71329000 |
| C | 2.80608000  | 1.67679000  | 0.76567000  |
| H | 1.72694000  | 1.86828000  | 0.86017000  |
| H | 3.34172000  | 2.32097000  | 1.48926000  |
| H | 3.27548000  | 1.24243000  | -2.67277000 |
| H | 1.68028000  | 1.18556000  | -1.86105000 |
| C | 3.29211000  | 1.99228000  | -0.64627000 |
| P | -2.45154000 | -0.41084000 | -1.31725000 |
| P | -2.40585000 | 0.29344000  | 1.31386000  |
| C | -1.84978000 | -2.50439000 | 0.62151000  |
| N | -2.36362000 | -3.55651000 | 0.89659000  |
| H | 3.24083000  | -0.88182000 | 2.92648000  |
| H | 3.27594000  | 0.89135000  | 3.18027000  |
| C | -2.61105000 | 2.08455000  | 0.75202000  |
| C | -2.64148000 | 1.41111000  | -1.74704000 |
| N | -2.22096000 | 2.38236000  | -0.67410000 |
| H | -1.96465000 | 2.72245000  | 1.37490000  |
| H | -3.65873000 | 2.39807000  | 0.89074000  |
| H | -2.00964000 | 1.63353000  | -2.62156000 |
| H | -3.69144000 | 1.62220000  | -2.00699000 |
| C | -2.70941000 | 3.75657000  | -1.03849000 |
| H | -2.33101000 | 4.00867000  | -2.03875000 |
| H | -2.32685000 | 4.47568000  | -0.30116000 |
| H | -3.80845000 | 3.75468000  | -1.03429000 |
| C | -4.12446000 | -0.34597000 | 0.90182000  |
| C | -4.15178000 | -0.73907000 | -0.59480000 |
| C | -2.44574000 | 0.54290000  | 3.15563000  |
| H | -1.57179000 | 0.05224000  | 3.60880000  |
| H | -3.36139000 | 0.08940000  | 3.56753000  |
| H | -2.42933000 | 1.61330000  | 3.41421000  |
| C | -2.54155000 | -1.12402000 | -3.01355000 |
| H | -1.64024000 | -0.84588000 | -3.58147000 |
| H | -3.44022000 | -0.76587000 | -3.54331000 |
| H | -2.58127000 | -2.22078000 | -2.92000000 |
| H | 2.95922000  | 3.01087000  | -0.90196000 |
| H | 4.39444000  | 2.01490000  | -0.67112000 |
| H | -4.34463000 | -1.81649000 | -0.72069000 |
| H | -4.91793000 | -0.18552000 | -1.16260000 |
| H | -4.88079000 | 0.41650000  | 1.15256000  |
| H | -4.29287000 | -1.22170000 | 1.54842000  |
| H | -0.94107000 | 2.62659000  | -0.75705000 |
| O | 1.38699000  | 4.84623000  | 0.07414000  |
| O | 0.21636000  | 3.16492000  | -0.91509000 |
| C | 0.52010000  | 3.91913000  | 0.07515000  |
| H | -0.03166000 | 3.73268000  | 1.03322000  |
| H | -0.18039000 | 0.42185000  | -0.15811000 |

Name-TS1011:G=-2846.657193//H=-2846.514253//SPE=-2847.10382308

Angstroms

| Atom | X           | Y           | Z           |
|------|-------------|-------------|-------------|
| S    | 0.56903000  | 2.04578000  | -0.28658000 |
| Ni   | 1.99700000  | 0.40123000  | -0.48147000 |
| S    | 0.68355000  | -0.52442000 | -1.96788000 |
| C    | 1.23520000  | 2.50785000  | 1.39397000  |
| C    | 2.75259000  | 2.51411000  | 1.23817000  |
| H    | 0.88612000  | 1.79303000  | 2.15572000  |
| H    | 0.87088000  | 3.51398000  | 1.65960000  |
| C    | 1.57071000  | -2.16500000 | -1.82714000 |
| C    | 3.05942000  | -1.83030000 | -1.84913000 |
| H    | 1.30529000  | -2.77551000 | -2.70607000 |
| H    | 1.31790000  | -2.72550000 | -0.90961000 |
| N    | 3.23789000  | 1.15143000  | 0.83213000  |
| N    | 3.39294000  | -0.96150000 | -0.67022000 |
| H    | 3.25981000  | 2.82847000  | 2.17018000  |
| H    | 3.03002000  | 3.21962000  | 0.43852000  |
| C    | 4.51324000  | 1.17050000  | 0.03954000  |
| C    | 4.60455000  | -0.09705000 | -0.86552000 |
| H    | 4.61313000  | 0.21225000  | -1.92006000 |
| H    | 5.52395000  | -0.67935000 | -0.67152000 |
| H    | 4.47999000  | 2.06458000  | -0.59879000 |
| H    | 5.38271000  | 1.26316000  | 0.71574000  |
| C    | 3.38328000  | 0.27410000  | 2.04767000  |
| C    | 3.54552000  | -1.81502000 | 0.55498000  |
| H    | 2.56784000  | -2.26360000 | 0.77810000  |
| H    | 4.24686000  | -2.63469000 | 0.30601000  |
| H    | 3.97158000  | 0.84058000  | 2.79505000  |
| H    | 2.40206000  | 0.05118000  | 2.49528000  |
| C    | 4.10038000  | -1.03943000 | 1.74676000  |
| P    | -2.73897000 | 1.36787000  | 0.40580000  |
| P    | -2.67948000 | -1.10446000 | -0.82274000 |
| C    | -1.54645000 | 1.26606000  | -2.09425000 |
| N    | -1.81197000 | 1.86524000  | -3.09894000 |
| H    | 3.30898000  | -1.26937000 | -2.76389000 |
| H    | 3.67991000  | -2.74709000 | -1.82441000 |
| N    | -3.77706000 | -0.78538000 | 1.67095000  |
| C    | -4.08357000 | -1.60998000 | 2.86876000  |
| H    | -4.05310000 | -0.97523000 | 3.76686000  |
| H    | -3.33785000 | -2.41694000 | 2.98452000  |
| H    | -5.08752000 | -2.05550000 | 2.78105000  |
| C    | -4.20566000 | -0.20250000 | -1.40859000 |
| C    | -4.26358000 | 1.16142000  | -0.66816000 |
| C    | -2.54464000 | -2.65532000 | -1.79488000 |
| H    | -2.32085000 | -2.38950000 | -2.84040000 |
| H    | -3.48163000 | -3.23413000 | -1.74974000 |
| H    | -1.71159000 | -3.25568000 | -1.39526000 |
| C    | -2.77212000 | 3.12170000  | 0.94366000  |
| H    | -1.98011000 | 3.29224000  | 1.68991000  |
| H    | -3.75508000 | 3.37038000  | 1.37501000  |
| H    | -2.57893000 | 3.75779000  | 0.06505000  |



|    |             |             |             |
|----|-------------|-------------|-------------|
| H  | 4.01691000  | -1.67829000 | 2.64154000  |
| H  | 5.17831000  | -0.85848000 | 1.60006000  |
| H  | -4.25122000 | 1.99898000  | -1.38298000 |
| H  | -5.16292000 | 1.26348000  | -0.03916000 |
| H  | -5.08958000 | -0.82952000 | -1.20741000 |
| H  | -4.11926000 | -0.06029000 | -2.49751000 |
| O  | 0.67330000  | -1.40870000 | 2.94059000  |
| C  | 0.23848000  | -1.83522000 | 1.84761000  |
| H  | -0.48348000 | -0.51030000 | 0.77645000  |
| Fe | -1.08180000 | 0.37661000  | -0.56271000 |
| O  | 0.25547000  | -2.92960000 | 1.24606000  |
| C  | -3.28645000 | -1.79214000 | 0.83523000  |
| H  | -4.01826000 | -2.58522000 | 0.64954000  |
| H  | -2.36706000 | -2.25207000 | 1.22212000  |
| C  | -3.20830000 | 0.43045000  | 1.93447000  |
| H  | -2.26016000 | 0.32595000  | 2.53833000  |
| H  | -3.94387000 | 0.96017000  | 2.55411000  |

## (II) Model 2

**Name-NiFe:** G= -2541.045914//H= -2540.959516//SPE =-2541.4377756  
 Angstroms

| Atom | X           | Y           | Z           |
|------|-------------|-------------|-------------|
| S    | -0.78988963 | -1.54215856 | -1.53858297 |
| Ni   | -1.94404719 | 0.00000429  | -0.50457891 |
| Fe   | 0.83613168  | 0.00000730  | -0.76942097 |
| S    | -0.78987755 | 1.54216692  | -1.53857342 |
| C    | -1.25447310 | -2.87111589 | -0.30059956 |
| C    | -2.71708262 | -2.66854722 | 0.07222595  |
| H    | -0.61834936 | -2.78087710 | 0.59409178  |
| H    | -1.09004193 | -3.85807723 | -0.76062700 |
| C    | -1.25444265 | 2.87111018  | -0.30056819 |
| C    | -2.71706519 | 2.66856470  | 0.07222055  |
| H    | -1.08997741 | 3.85807781  | -0.76057013 |
| H    | -0.61833385 | 2.78083250  | 0.59413047  |
| N    | -2.85955397 | -1.28507108 | 0.60798589  |
| N    | -2.85958990 | 1.28507966  | 0.60794409  |
| H    | -3.04018102 | -3.41174904 | 0.82512006  |
| H    | -3.36886817 | -2.75548657 | -0.81164884 |
| C    | -4.25044220 | -0.77748158 | 0.80690220  |
| C    | -4.25049718 | 0.77747768  | 0.80661638  |
| H    | -4.85431802 | 1.14679887  | -0.03529890 |
| H    | -4.67191144 | 1.18846272  | 1.73944800  |
| H    | -4.85452858 | -1.14714180 | -0.03467213 |
| H    | -4.67151023 | -1.18815813 | 1.74002331  |
| P    | 2.15222583  | -1.39032912 | 0.29080009  |

|   |             |             |             |
|---|-------------|-------------|-------------|
| P | 2.15222255  | 1.39033429  | 0.29082207  |
| C | 1.87759033  | -0.00000872 | -2.23528989 |
| N | 2.54591041  | 0.00000016  | -3.23615805 |
| H | -3.36882686 | 2.75553890  | -0.81166872 |
| H | -3.04016947 | 3.41175552  | 0.82512246  |
| C | 1.67573650  | 1.22862108  | 2.10073082  |
| C | 1.67574132  | -1.22865984 | 2.10071109  |
| N | 0.89525978  | -0.00002179 | 2.32407085  |
| H | 1.03621081  | 2.09429567  | 2.34039402  |
| H | 2.58701068  | 1.28587214  | 2.74000647  |
| H | 1.03621825  | -2.09434070 | 2.34035849  |
| H | 2.58701445  | -1.28591765 | 2.73998712  |
| C | 0.31763838  | -0.00003656 | 3.67436567  |
| H | -0.31326539 | -0.89432075 | 3.80430091  |
| H | -0.31327416 | 0.89423902  | 3.80431666  |
| H | 1.09543499  | -0.00004017 | 4.47040858  |
| C | 3.90796002  | 0.77137263  | 0.22987055  |
| C | 3.90796157  | -0.77136267 | 0.22985949  |
| C | 2.34560871  | 3.19599747  | 0.01185432  |
| H | 2.66432641  | 3.35025608  | -1.03130114 |
| H | 3.11498330  | 3.59640864  | 0.69310568  |
| H | 1.39677465  | 3.72472434  | 0.18033353  |
| C | 2.34561202  | -3.19597708 | 0.01174318  |
| H | 1.39680186  | -3.72472621 | 0.18028388  |
| H | 3.11505513  | -3.59641205 | 0.69290260  |
| H | 2.66423378  | -3.35017791 | -1.03145039 |
| H | 4.35457124  | -1.17256113 | -0.69431243 |
| H | 4.45885703  | -1.19352830 | 1.08672118  |
| H | 4.45885573  | 1.19352654  | 1.08673782  |
| H | 4.35456856  | 1.17258436  | -0.69429616 |
| H | -2.35851244 | -1.24677665 | 1.51030042  |
| H | -2.35866127 | 1.24676333  | 1.51032213  |

**Name-NiFe10:**G= -2541.741641//H= -2541.652440//SPE =-2542.1371685  
Angstroms

| Atom | X          | Y           | Z           |
|------|------------|-------------|-------------|
| S    | 1.02090771 | 1.63651512  | -1.44727293 |
| Ni   | 1.96911833 | 0.00768240  | -0.30884697 |
| S    | 1.00335933 | -1.50757578 | -1.58228509 |
| C    | 1.46842330 | 2.90529847  | -0.14973899 |
| C    | 2.89143978 | 2.63982431  | 0.32036987  |
| H    | 0.76327420 | 2.81757096  | 0.69279132  |
| H    | 1.37220163 | 3.91271696  | -0.58721121 |
| C    | 1.41731182 | -2.90594678 | -0.41612517 |
| C    | 2.80268269 | -2.67959472 | 0.17341750  |
| H    | 1.37508175 | -3.85519442 | -0.97474048 |
| H    | 0.66400871 | -2.93896029 | 0.38882110  |
| N    | 2.93237567 | 1.24755094  | 0.84345427  |
| N    | 2.78092837 | -1.35014800 | 0.84117051  |
| H    | 3.20730327 | 3.35804429  | 1.10182351  |

|    |             |             |             |
|----|-------------|-------------|-------------|
| H  | 3.60075626  | 2.70423001  | -0.52137509 |
| C  | 4.27342672  | 0.62576327  | 1.00068673  |
| C  | 4.07226480  | -0.84348783 | 1.41514288  |
| H  | 4.90518786  | -1.45864010 | 1.04198823  |
| H  | 4.03659203  | -0.94558629 | 2.51216452  |
| H  | 4.76824963  | 0.68643282  | 0.01858439  |
| H  | 4.89177052  | 1.16916894  | 1.74028779  |
| P  | -2.07413894 | 1.36690913  | 0.19397654  |
| P  | -2.10796803 | -1.33068541 | 0.02393513  |
| C  | -1.45966605 | 0.12158738  | -2.48234105 |
| N  | -1.94770204 | 0.16110972  | -3.58400292 |
| H  | 3.57089463  | -2.64834215 | -0.61616243 |
| H  | 3.06888245  | -3.47559983 | 0.89673961  |
| C  | -2.24051320 | -1.33295809 | 1.90850556  |
| C  | -2.21472560 | 1.12110606  | 2.06314670  |
| N  | -1.65541513 | -0.14766474 | 2.54905396  |
| H  | -1.70008828 | -2.22364647 | 2.27541798  |
| H  | -3.31747212 | -1.46645161 | 2.17060953  |
| H  | -1.66133613 | 1.94628019  | 2.54508712  |
| H  | -3.29080098 | 1.23880561  | 2.33607344  |
| C  | -1.82316743 | -0.23709288 | 4.00463659  |
| H  | -1.33016752 | 0.62185483  | 4.48998408  |
| H  | -1.35557201 | -1.16380689 | 4.37735620  |
| H  | -2.89389097 | -0.24144604 | 4.31498343  |
| C  | -3.81341512 | -0.69670228 | -0.44071640 |
| C  | -3.79228178 | 0.84584193  | -0.35026396 |
| C  | -2.26551248 | -3.13602680 | -0.34039261 |
| H  | -2.34527425 | -3.26728048 | -1.43144683 |
| H  | -3.17056070 | -3.54273154 | 0.14262118  |
| H  | -1.38352892 | -3.68491989 | 0.02175460  |
| C  | -2.17521580 | 3.20936748  | 0.07878992  |
| H  | -1.29167292 | 3.67524825  | 0.54011277  |
| H  | -3.08433664 | 3.57451338  | 0.58688863  |
| H  | -2.21401653 | 3.49254672  | -0.98516230 |
| H  | -3.97049584 | 1.31006984  | -1.33407376 |
| H  | -4.54423778 | 1.23904442  | 0.35537206  |
| H  | -4.57216146 | -1.14892157 | 0.22065864  |
| H  | -4.01031669 | -1.03855472 | -1.46990431 |
| Fe | -0.66001630 | 0.05736189  | -0.77661104 |
| H  | 2.09413762  | -1.40866829 | 1.60660365  |
| H  | 2.44308552  | 1.23432279  | 1.75162910  |
| H  | 0.12532780  | 0.01718626  | 0.57714319  |

**Name-NiFe1:**G= -2542.204244//H= -2542.119544//SPE =-2542.6140193

Angstroms

| Atom | X           | Y           | Z           |
|------|-------------|-------------|-------------|
| S    | -0.99333157 | -1.57421793 | -1.35248886 |
| Ni   | -2.13180172 | -0.00003370 | -0.32738631 |
| Fe   | 0.65710818  | 0.00010057  | -0.59757638 |
| S    | -0.99349692 | 1.57436793  | -1.35232684 |

|   |             |             |             |
|---|-------------|-------------|-------------|
| C | -1.43627591 | -2.86764680 | -0.07736032 |
| C | -2.89494771 | -2.67675197 | 0.31419250  |
| H | -0.77229986 | -2.75367203 | 0.79540738  |
| H | -1.26940573 | -3.86380486 | -0.51744837 |
| C | -1.43667782 | 2.86765937  | -0.07713824 |
| C | -2.89533832 | 2.67653139  | 0.31433771  |
| H | -1.26992064 | 3.86386563  | -0.51716045 |
| H | -0.77273162 | 2.75372461  | 0.79565404  |
| N | -3.04841626 | -1.27624660 | 0.79961236  |
| N | -3.04861878 | 1.27597747  | 0.79967506  |
| H | -3.20113298 | -3.39356749 | 1.09945614  |
| H | -3.55698440 | -2.80471714 | -0.55719868 |
| C | -4.44119528 | -0.77719671 | 0.99462467  |
| C | -4.44133102 | 0.77670744  | 0.99456375  |
| H | -5.04053656 | 1.14901455  | 0.15057737  |
| H | -4.86388587 | 1.18891808  | 1.92690377  |
| H | -5.04044585 | -1.14966858 | 0.15074340  |
| H | -4.86356237 | -1.18940861 | 1.92704851  |
| P | 2.23377376  | -1.38473897 | 0.03282137  |
| P | 2.23352377  | 1.38496127  | 0.03340803  |
| C | 1.31021330  | 0.00032024  | -2.33375301 |
| N | 1.70045591  | 0.00046890  | -3.46602157 |
| H | -3.55735552 | 2.80444398  | -0.55707643 |
| H | -3.20166731 | 3.39325845  | 1.09962616  |
| C | 2.53468671  | 1.22794517  | 1.88829690  |
| C | 2.53496656  | -1.22847199 | 1.88776705  |
| N | 1.95099017  | -0.00044973 | 2.44276668  |
| H | 2.04770903  | 2.09074503  | 2.37371216  |
| H | 3.63020719  | 1.30375750  | 2.07012778  |
| H | 2.04820362  | -2.09159282 | 2.37282746  |
| H | 3.63050907  | -1.30409788 | 2.06953559  |
| C | 2.05144967  | -0.00074921 | 3.91110269  |
| H | 1.55121009  | -0.89610495 | 4.31434551  |
| H | 1.55103851  | 0.89434339  | 4.31471677  |
| H | 3.10620448  | -0.00071871 | 4.26199875  |
| C | 3.84476933  | 0.77396582  | -0.68278840 |
| C | 3.84491526  | -0.77316356 | -0.68311287 |
| C | 2.26025235  | 3.19816654  | -0.25150923 |
| H | 2.17302663  | 3.38554945  | -1.33339992 |
| H | 3.20521808  | 3.62645377  | 0.12212322  |
| H | 1.41126183  | 3.66825962  | 0.26717428  |
| C | 2.26070235  | -3.19780787 | -0.25292730 |
| H | 1.41175665  | -3.66822281 | 0.26553907  |
| H | 3.20571258  | -3.62617228 | 0.12050326  |
| H | 2.17348616  | -3.38469738 | -1.33490415 |
| H | -0.34442906 | 0.00005298  | 0.72667493  |
| H | 0.43846005  | -0.00036218 | 1.07614053  |
| H | 3.91467253  | -1.17263182 | -1.70708584 |
| H | 4.67727221  | -1.19215631 | -0.09363695 |
| H | 4.67706889  | 1.19287582  | -0.09317190 |
| H | 3.91441466  | 1.17387517  | -1.70659814 |
| H | -2.54270879 | -1.20724457 | 1.69708360  |

H -2.54295139 1.20699942 1.69717107

Name-NiFe9:G=//H=//SPE=

| Atom | Angstroms   |             |             |
|------|-------------|-------------|-------------|
|      | X           | Y           | Z           |
| S    | -0.96679706 | 1.49772567  | -1.57377626 |
| Ni   | -2.14255489 | 0.57093282  | 0.01524536  |
| S    | -0.93054706 | 1.49526190  | 1.57377859  |
| C    | -1.44400583 | 0.19026422  | -2.82345671 |
| C    | -2.93676867 | -0.07566671 | -2.65181842 |
| H    | -0.84879251 | -0.71908680 | -2.64106409 |
| H    | -1.21742165 | 0.56803151  | -3.83331931 |
| C    | -1.37855756 | 0.18946360  | 2.83693066  |
| C    | -2.87514382 | -0.07499405 | 2.70034672  |
| H    | -1.12716853 | 0.56543020  | 3.84113517  |
| H    | -0.79278588 | -0.72368036 | 2.63801228  |
| N    | -3.16501515 | -0.47492767 | -1.23882700 |
| N    | -3.13383768 | -0.48540531 | 1.29325192  |
| H    | -3.28204064 | -0.87025543 | -3.33973515 |
| H    | -3.52116104 | 0.83783856  | -2.84922188 |
| C    | -4.56714520 | -0.48209264 | -0.73627318 |
| C    | -4.54913395 | -0.49493559 | 0.82007790  |
| H    | -5.03180615 | 0.41384290  | 1.20932617  |
| H    | -5.07931253 | -1.37180293 | 1.23022206  |
| H    | -5.05421812 | 0.43545523  | -1.09893872 |
| H    | -5.11245792 | -1.34930564 | -1.14740086 |
| P    | 2.25982190  | 0.22059780  | -1.40407510 |
| P    | 2.31678344  | 0.29443735  | 1.35584878  |
| C    | 1.27197238  | 2.54448596  | -0.03346485 |
| N    | 1.60242039  | 3.69795555  | -0.04638675 |
| H    | -3.45576343 | 0.83910134  | 2.90303276  |
| H    | -3.20595127 | -0.86499571 | 3.40004074  |
| C    | 2.82576473  | -1.51625715 | 1.31615102  |
| C    | 2.75587867  | -1.59216978 | -1.27548214 |
| N    | 2.52097090  | -2.26928317 | 0.05080814  |
| H    | 2.29350610  | -2.04516231 | 2.12215507  |
| H    | 3.91001399  | -1.57747214 | 1.50820040  |
| H    | 2.17331868  | -2.16100452 | -2.01676749 |
| H    | 3.82710682  | -1.67439608 | -1.52385436 |
| C    | 3.25196589  | -3.58283883 | 0.07005479  |
| H    | 2.94482775  | -4.16461830 | -0.81003315 |
| H    | 2.97845479  | -4.12106551 | 0.98883469  |
| H    | 4.33469518  | -3.39402932 | 0.04467561  |
| C    | 3.87038896  | 1.09274549  | 0.69822388  |
| C    | 3.83570296  | 1.05475991  | -0.85009756 |
| C    | 2.33656525  | 0.60432486  | 3.16288700  |
| H    | 2.16524668  | 1.68004200  | 3.32556539  |
| H    | 3.30776869  | 0.31401885  | 3.59603066  |
| H    | 1.52683173  | 0.03278393  | 3.64211341  |
| C    | 2.23436446  | 0.41337620  | -3.22824129 |

|    |             |             |             |
|----|-------------|-------------|-------------|
| H  | 1.41910942  | -0.19311324 | -3.65157363 |
| H  | 3.19804661  | 0.09753181  | -3.66048480 |
| H  | 2.05520075  | 1.47494348  | -3.46077190 |
| H  | 3.82218343  | 2.07061115  | -1.27598662 |
| H  | 4.69610893  | 0.51405287  | -1.27570962 |
| H  | 4.74778848  | 0.56824470  | 1.11072219  |
| H  | 3.88030460  | 2.12808275  | 1.07174248  |
| O  | -2.02995226 | -2.91770811 | -0.11344329 |
| C  | -0.80259690 | -2.61581755 | -0.01281852 |
| H  | -0.53725913 | -1.52031304 | -0.03241314 |
| Fe | 0.68622736  | 0.83265474  | -0.00877911 |
| O  | 0.17039423  | -3.43260260 | 0.11122385  |
| H  | 1.47885826  | -2.58595532 | 0.09042252  |
| H  | -2.74338871 | -1.43458349 | 1.15363537  |
| H  | -2.76260503 | -1.42141965 | -1.08613253 |

**Name-NiFe8:**G= -2730.625485//H= -2730.529413//SPE =-2731.0493648

Angstroms

| Atom | X           | Y           | Z           |
|------|-------------|-------------|-------------|
| S    | 0.83313676  | 1.41061215  | -1.52237112 |
| Ni   | 2.18506552  | 0.06005825  | -0.45223317 |
| Fe   | -0.73727558 | -0.11168172 | -0.60644619 |
| S    | 1.13369881  | -1.70235156 | -1.19949431 |
| C    | 1.19891078  | 2.87383118  | -0.42649445 |
| C    | 2.68467633  | 2.85543936  | -0.08627028 |
| H    | 0.58651227  | 2.79299513  | 0.48584099  |
| H    | 0.92451872  | 3.79438265  | -0.96591406 |
| C    | 2.01929663  | -2.89738488 | -0.06380226 |
| C    | 3.46239377  | -2.42857933 | 0.08302203  |
| H    | 1.97520038  | -3.89609579 | -0.52720114 |
| H    | 1.51673530  | -2.95374369 | 0.91539045  |
| N    | 2.98559392  | 1.53152361  | 0.52643034  |
| N    | 3.44245867  | -1.01761204 | 0.55792627  |
| H    | 2.94472132  | 3.67315931  | 0.61252489  |
| H    | 3.30149794  | 2.95821488  | -0.99355386 |
| C    | 4.42013515  | 1.21654293  | 0.83598286  |
| C    | 4.71065222  | -0.24579679 | 0.44314814  |
| H    | 5.02509874  | -0.30634582 | -0.61061275 |
| H    | 5.50651590  | -0.68335170 | 1.07332574  |
| H    | 5.07227452  | 1.89439111  | 0.26535582  |
| H    | 4.59918027  | 1.38800584  | 1.90991924  |
| P    | -2.50569354 | 1.15588581  | -0.56738246 |
| P    | -2.23274817 | -1.48747658 | 0.19233071  |
| C    | -1.19317949 | -0.50125367 | -2.34204295 |
| N    | -1.46278297 | -0.73243977 | -3.48839675 |
| H    | 3.97761429  | -2.44479129 | -0.89108087 |
| H    | 4.02503388  | -3.06551110 | 0.79165813  |
| C    | -2.86346900 | -0.90435738 | 1.87890714  |
| C    | -3.11585667 | 1.52997298  | 1.17407130  |

|   |             |             |             |
|---|-------------|-------------|-------------|
| N | -2.57142442 | 0.54536528  | 2.17024007  |
| H | -2.35315608 | -1.48742996 | 2.66119443  |
| H | -3.95078077 | -1.06146011 | 1.96199905  |
| H | -2.74701692 | 2.52212040  | 1.47629312  |
| H | -4.21634096 | 1.51519083  | 1.22570416  |
| C | -2.98760516 | 0.90311042  | 3.56433704  |
| H | -2.68304420 | 1.93966604  | 3.76370205  |
| H | -2.48739333 | 0.22060992  | 4.26486747  |
| H | -4.07911791 | 0.80254991  | 3.64538168  |
| C | -3.77858753 | -1.32023269 | -0.83384687 |
| C | -3.94684935 | 0.16681378  | -1.23342683 |
| C | -2.02583995 | -3.28483843 | 0.49983501  |
| H | -1.78297491 | -3.77039540 | -0.45848961 |
| H | -2.94842563 | -3.72326209 | 0.91509377  |
| H | -1.19060441 | -3.43762621 | 1.20112123  |
| C | -2.63663703 | 2.79808745  | -1.37085182 |
| H | -1.90504173 | 3.48437038  | -0.91728781 |
| H | -3.65492040 | 3.20474881  | -1.25642739 |
| H | -2.40306976 | 2.67526860  | -2.44014106 |
| H | -3.94062242 | 0.28838038  | -2.32749189 |
| H | -4.88220191 | 0.60041825  | -0.84375539 |
| H | -4.64187191 | -1.70230267 | -0.26519096 |
| H | -3.64056081 | -1.95745027 | -1.72167051 |
| H | -1.52235154 | 0.63829994  | 2.08685104  |
| O | 1.41329703  | -0.03296291 | 2.97288408  |
| O | -0.05123799 | 0.45456709  | 1.32079491  |
| C | 0.62917855  | -0.37876163 | 2.05328795  |
| H | 0.46523876  | -1.45901295 | 1.84496039  |
| H | 3.13395570  | -1.01433973 | 1.54432581  |
| H | 2.45328052  | 1.47787948  | 1.41109302  |

NiFe8B, complex is similar to NiFe8 in which oxygen and hydrogen of formate anion are attached with Fe and Ni, respectively.

**Name-NiFe8B:**G= -2730.622452//H= -2730.526653//SPE =-2731.0463124  
Angstroms

| Atom | X           | Y           | Z           |
|------|-------------|-------------|-------------|
| S    | -1.01081714 | -1.49842326 | -1.19261461 |
| Ni   | -2.34048753 | 0.00290394  | -0.33619954 |
| Fe   | 0.72006196  | 0.03719971  | -0.55436488 |
| S    | -1.05913245 | 1.63473465  | -1.00921948 |
| C    | -1.59056172 | -2.81199585 | -0.00047533 |
| C    | -3.11408130 | -2.71975749 | 0.06168303  |
| H    | -1.14020224 | -2.64294622 | 0.99234475  |
| H    | -1.26537112 | -3.79713479 | -0.37231815 |
| C    | -1.75671404 | 2.81526534  | 0.25976326  |
| C    | -3.27435929 | 2.63925980  | 0.23892477  |

|   |             |             |             |
|---|-------------|-------------|-------------|
| H | -1.46872683 | 3.84223535  | -0.01829916 |
| H | -1.34521316 | 2.59181186  | 1.25832458  |
| N | -3.45471552 | -1.33896764 | 0.50665865  |
| N | -3.56272415 | 1.21422986  | 0.56862264  |
| H | -3.53633131 | -3.46800689 | 0.75826398  |
| H | -3.55811485 | -2.87470749 | -0.93502164 |
| C | -4.87541570 | -0.87980183 | 0.39668901  |
| C | -4.90229824 | 0.66478738  | 0.21631181  |
| H | -5.08111275 | 0.92081343  | -0.83889785 |
| H | -5.69578143 | 1.12984630  | 0.82812118  |
| H | -5.32407733 | -1.36357284 | -0.48319818 |
| H | -5.43700233 | -1.19743187 | 1.29103956  |
| P | 2.44100738  | -1.31843326 | -0.51783487 |
| P | 2.38445100  | 1.43292293  | -0.23745128 |
| C | 0.95114298  | 0.18618808  | -2.37042931 |
| N | 1.06351137  | 0.27076829  | -3.56207644 |
| H | -3.67817848 | 2.84302676  | -0.76651780 |
| H | -3.77188252 | 3.31172341  | 0.96218220  |
| C | 3.24225002  | 1.16506389  | 1.42301252  |
| C | 3.30335191  | -1.36461373 | 1.16073372  |
| N | 2.95242274  | -0.18327186 | 2.01987535  |
| H | 2.85834395  | 1.91244419  | 2.13430255  |
| H | 4.33330879  | 1.28623353  | 1.32188649  |
| H | 2.96462011  | -2.26023367 | 1.70408707  |
| H | 4.39778753  | -1.40659452 | 1.03611187  |
| C | 3.55740151  | -0.30853917 | 3.38026917  |
| H | 3.23916381  | -1.26431972 | 3.81882712  |
| H | 3.20062403  | 0.52523474  | 4.00076612  |
| H | 4.65312122  | -0.27545457 | 3.29206820  |
| C | 3.75676717  | 0.97184101  | -1.41442491 |
| C | 3.79116853  | -0.56926986 | -1.56755477 |
| C | 2.28090734  | 3.26361676  | -0.29786263 |
| H | 1.92083948  | 3.55601471  | -1.29681969 |
| H | 3.26850779  | 3.71754791  | -0.11264701 |
| H | 1.56068475  | 3.60922905  | 0.45999769  |
| C | 2.41484574  | -3.09820792 | -0.96213592 |
| H | 1.73013531  | -3.63160666 | -0.28455130 |
| H | 3.42661925  | -3.53036443 | -0.89069152 |
| H | 2.04442910  | -3.18926175 | -1.99532593 |
| H | 3.59548598  | -0.87007777 | -2.60840528 |
| H | 4.75908629  | -0.99815638 | -1.26080864 |
| H | 4.70912709  | 1.37551098  | -1.03371762 |
| H | 3.53423873  | 1.46182224  | -2.37500551 |
| H | 1.87556198  | -0.22421504 | 2.08611740  |
| O | -0.39993045 | -0.19518410 | 3.59413357  |
| O | 0.44037695  | -0.19936740 | 1.49927711  |
| C | -0.52292969 | -0.05974067 | 2.34976110  |
| H | -1.51205470 | 0.19070219  | 1.90746113  |
| H | -3.17842138 | -1.27495857 | 1.49870772  |
| H | -3.41174151 | 1.10054327  | 1.58288755  |



Name-NiFe2:G= -2542.204975//H= -2542.116848//SPE=-2542.6157599

Angstroms

| Atom | X           | Y           | Z           |
|------|-------------|-------------|-------------|
| S    | 0.89087512  | 1.51991433  | -1.55725842 |
| Ni   | 1.96381926  | -0.00835284 | -0.39539267 |
| Fe   | -0.72686823 | -0.04234621 | -0.68761755 |
| S    | 0.90700995  | -1.62424413 | -1.45123456 |
| C    | 1.35335749  | 2.88832320  | -0.37270074 |
| C    | 2.78673961  | 2.67926585  | 0.09577178  |
| H    | 0.66298857  | 2.86754888  | 0.48730771  |
| H    | 1.24134235  | 3.85484824  | -0.89005684 |
| C    | 1.41018709  | -2.89311878 | -0.17440153 |
| C    | 2.86756484  | -2.65222321 | 0.19205393  |
| H    | 1.26304177  | -3.90022307 | -0.59736789 |
| H    | 0.76359797  | -2.78374695 | 0.71215621  |
| N    | 2.85270448  | 1.32576250  | 0.71103194  |
| N    | 2.97073134  | -1.25631645 | 0.69911717  |
| H    | 3.08972302  | 3.45498965  | 0.82573038  |
| H    | 3.48954203  | 2.69912903  | -0.75284376 |
| C    | 4.20013386  | 0.82587636  | 1.14140394  |
| C    | 4.33366692  | -0.66608245 | 0.77095375  |
| H    | 4.77724293  | -0.77549600 | -0.23089746 |
| H    | 4.97026462  | -1.20596461 | 1.49643212  |
| H    | 4.97878522  | 1.40985499  | 0.62837555  |
| H    | 4.31109221  | 0.98378584  | 2.22664211  |
| P    | -2.17859533 | 1.36025776  | 0.08134018  |
| P    | -2.14237641 | -1.39090562 | 0.23056883  |
| C    | -1.56835009 | -0.10346347 | -2.36115591 |
| N    | -2.09108679 | -0.14011361 | -3.44319775 |
| H    | 3.51506769  | -2.73548192 | -0.69623247 |
| H    | 3.22308757  | -3.36978264 | 0.95618561  |
| C    | -2.12733792 | -1.15439993 | 2.11319604  |
| C    | -2.15262171 | 1.34740653  | 1.97656522  |
| N    | -1.41935825 | 0.12563487  | 2.44240611  |
| H    | -1.55070602 | -1.97427925 | 2.56826078  |
| H    | -3.14197195 | -1.12928087 | 2.54025825  |
| H    | -1.58974262 | 2.22482327  | 2.33059300  |
| H    | -3.16439111 | 1.35219937  | 2.41126355  |
| C    | -0.99266212 | 0.20705187  | 3.86813745  |
| H    | -0.39371320 | 1.11910616  | 4.00178561  |
| H    | -0.38620535 | -0.67953603 | 4.10174289  |
| H    | -1.88069718 | 0.23914066  | 4.51569053  |
| C    | -3.87574072 | -0.83360408 | -0.19142393 |
| C    | -3.89779350 | 0.70925570  | -0.26908120 |
| C    | -2.24402451 | -3.22356818 | 0.09695636  |
| H    | -2.31579964 | -3.48716577 | -0.97011854 |
| H    | -3.13691636 | -3.59469206 | 0.62750422  |
| H    | -1.34351564 | -3.68998339 | 0.52279017  |
| C    | -2.33397314 | 3.15890646  | -0.27506890 |
| H    | -1.43312417 | 3.69611127  | 0.05576245  |
| H    | -3.21926574 | 3.57399739  | 0.23505765  |

|   |             |             |             |
|---|-------------|-------------|-------------|
| H | -2.44769514 | 3.28278848  | -1.36382116 |
| H | 0.18649074  | 0.00079471  | 0.63403866  |
| H | -4.16107513 | 1.05670590  | -1.28120176 |
| H | -4.61050669 | 1.15805765  | 0.44257330  |
| H | -4.58036099 | -1.22985953 | 0.55859501  |
| H | -4.12160629 | -1.28796847 | -1.16514375 |
| H | -0.55685531 | 0.09636793  | 1.76792170  |
| H | 2.53528209  | -1.22757276 | 1.63404477  |
| H | 2.24083721  | 1.34213294  | 1.54053549  |

**Name-TS12:** G= -2542.205522//H= -2542.117478//SPE =-2542.6114511  
 Angstroms

| Atom | X           | Y           | Z           |
|------|-------------|-------------|-------------|
| S    | -0.87284472 | -1.53953132 | -1.48286641 |
| Ni   | -2.01483424 | 0.00524107  | -0.41971735 |
| Fe   | 0.73888028  | 0.02490852  | -0.63589442 |
| S    | -0.88604781 | 1.60462876  | -1.41746565 |
| C    | -1.34416121 | -2.87621771 | -0.26422960 |
| C    | -2.79976631 | -2.68248793 | 0.13763889  |
| H    | -0.68480663 | -2.80787843 | 0.61756805  |
| H    | -1.19089507 | -3.85706423 | -0.74220727 |
| C    | -1.39035993 | 2.87696986  | -0.14338105 |
| C    | -2.86019938 | 2.66158264  | 0.18920548  |
| H    | -1.21682824 | 3.88222605  | -0.56011480 |
| H    | -0.76241298 | 2.75413743  | 0.75504420  |
| N    | -2.92532431 | -1.30352151 | 0.68492235  |
| N    | -3.00500006 | 1.26067341  | 0.67285415  |
| H    | -3.11292224 | -3.43047739 | 0.89118318  |
| H    | -3.46669721 | -2.76100781 | -0.73594410 |
| C    | -4.30247322 | -0.81237905 | 1.01205844  |
| C    | -4.38506680 | 0.70784067  | 0.73277369  |
| H    | -4.83976479 | 0.89132076  | -0.25274368 |
| H    | -4.98958944 | 1.22844666  | 1.49751273  |
| H    | -5.02269881 | -1.34668890 | 0.37522931  |
| H    | -4.53201316 | -1.04807964 | 2.06434717  |
| P    | 2.22545717  | -1.37736576 | 0.10707152  |
| P    | 2.20210955  | 1.39832509  | 0.20306046  |
| C    | 1.53942612  | 0.06326871  | -2.30976553 |
| N    | 2.03774015  | 0.08468816  | -3.40194757 |
| H    | -3.48741756 | 2.77275773  | -0.71024739 |
| H    | -3.21440867 | 3.37499860  | 0.95736370  |
| C    | 2.17425216  | 1.17451252  | 2.08671337  |
| C    | 2.19136219  | -1.29350915 | 2.00093802  |
| N    | 1.46464421  | -0.07717720 | 2.40661949  |
| H    | 1.60709136  | 2.01401333  | 2.51941961  |
| H    | 3.20333548  | 1.18267647  | 2.49069133  |
| H    | 1.63507287  | -2.17004903 | 2.37037072  |
| H    | 3.21940520  | -1.31652743 | 2.40723090  |
| C    | 0.92615633  | -0.12898314 | 3.77717434  |
| H    | 0.30674783  | -1.03325649 | 3.88311985  |

|   |             |             |             |
|---|-------------|-------------|-------------|
| H | 0.29881619  | 0.75975218  | 3.94816832  |
| H | 1.73389160  | -0.15236064 | 4.53134724  |
| C | 3.91616567  | 0.81401156  | -0.24598690 |
| C | 3.93000703  | -0.73021668 | -0.29751354 |
| C | 2.29355144  | 3.22265394  | 0.00421570  |
| H | 2.36666439  | 3.45510695  | -1.06992349 |
| H | 3.18164082  | 3.61684272  | 0.52600677  |
| H | 1.38738280  | 3.69261597  | 0.41424792  |
| C | 2.35182788  | -3.17865144 | -0.23288852 |
| H | 1.44667833  | -3.69456362 | 0.12007502  |
| H | 3.23730037  | -3.59915262 | 0.27242920  |
| H | 2.44887932  | -3.32248221 | -1.32073459 |
| H | -0.22928814 | 0.00277728  | 0.69731765  |
| H | 4.17499662  | -1.09572560 | -1.30779172 |
| H | 4.65508306  | -1.16782306 | 0.40888727  |
| H | 4.63469589  | 1.21730722  | 0.48715025  |
| H | 4.15233641  | 1.25008624  | -1.23026829 |
| H | 0.47953901  | -0.04208897 | 1.35737026  |
| H | -2.57346767 | 1.20753894  | 1.60907080  |
| H | -2.36184769 | -1.27070752 | 1.54864246  |

**Name-TS23:** G = -2730.581595//H = -2730.497974//SPE = -2731.0114372

Angstroms

| Atom | X           | Y           | Z           |
|------|-------------|-------------|-------------|
| S    | -0.96372651 | 1.40069947  | 1.57073740  |
| Ni   | -2.10233222 | -0.12184030 | 0.48979570  |
| S    | -0.81730419 | -1.72612975 | 1.23389176  |
| C    | -1.70058830 | 2.80734970  | 0.58781959  |
| C    | -3.18927198 | 2.52268141  | 0.42490243  |
| H    | -1.20029552 | 2.88487715  | -0.38927617 |
| H    | -1.53463882 | 3.74310165  | 1.14612997  |
| C    | -1.32003268 | -2.91538362 | -0.11278046 |
| C    | -2.82433362 | -2.77555198 | -0.31710585 |
| H    | -1.05456988 | -3.93704260 | 0.20363484  |
| H    | -0.76789830 | -2.67518779 | -1.03634475 |
| N    | -3.32890420 | 1.19720053  | -0.24334722 |
| N    | -3.09173682 | -1.34813716 | -0.64574285 |
| H    | -3.69347337 | 3.30794816  | -0.16918438 |
| H    | -3.68352832 | 2.45578600  | 1.40799677  |
| C    | -4.64793749 | 0.51497158  | -0.12789050 |
| C    | -4.52099367 | -0.90131391 | -0.73041590 |
| H    | -5.15012568 | -1.60449090 | -0.16467806 |
| H    | -4.84262515 | -0.92252832 | -1.78461764 |
| H    | -4.87841511 | 0.45567356  | 0.94718407  |
| H    | -5.44625055 | 1.09485217  | -0.62644410 |
| P    | 2.28584490  | 1.42112608  | 0.17607512  |
| P    | 2.44685587  | -1.33717089 | 0.21855636  |
| C    | 1.29756713  | -0.12524707 | 2.45725243  |
| N    | 1.60586629  | -0.18954879 | 3.61531534  |
| H    | -3.37173266 | -3.02085052 | 0.60748519  |

|    |             |             |             |
|----|-------------|-------------|-------------|
| H  | -3.18644089 | -3.43522682 | -1.12861339 |
| C  | 2.96280415  | -1.24514981 | -1.59564633 |
| C  | 2.80045275  | 1.26922521  | -1.64134041 |
| N  | 2.32467989  | -0.03678564 | -2.21337941 |
| H  | 2.57500027  | -2.12723366 | -2.12763756 |
| H  | 4.05419788  | -1.17841297 | -1.72372630 |
| H  | 2.30970594  | 2.07026310  | -2.21400505 |
| H  | 3.89197012  | 1.33490018  | -1.77112376 |
| C  | 2.38147267  | -0.05661481 | -3.70718537 |
| H  | 1.81340740  | 0.80245365  | -4.09126167 |
| H  | 1.93603277  | -0.99612676 | -4.06215562 |
| H  | 3.43219253  | 0.01146557  | -4.02134885 |
| C  | 3.97040402  | -0.61816385 | 1.03770211  |
| C  | 3.87492282  | 0.92840058  | 1.02466061  |
| C  | 2.54133065  | -3.13978353 | 0.54882458  |
| H  | 2.35471971  | -3.30331767 | 1.62197170  |
| H  | 3.53723025  | -3.53075727 | 0.28266494  |
| H  | 1.76753628  | -3.66057526 | -0.03579360 |
| C  | 2.16581267  | 3.24379293  | 0.35756228  |
| H  | 1.31317980  | 3.60660006  | -0.23779373 |
| H  | 3.09398736  | 3.73540244  | 0.02191750  |
| H  | 1.98664326  | 3.47444797  | 1.41948343  |
| H  | 3.82703165  | 1.33346826  | 2.04802376  |
| H  | 4.72864483  | 1.39732188  | 0.50808248  |
| H  | 4.86715713  | -0.98555224 | 0.51228237  |
| H  | 3.99201003  | -1.00688560 | 2.06754698  |
| O  | -1.10431873 | -0.43168115 | -2.85616713 |
| C  | -0.71212017 | 0.61419371  | -2.40917910 |
| H  | 0.12274748  | 0.06403269  | -0.87383872 |
| Fe | 0.76646396  | -0.04276628 | 0.67279139  |
| O  | -0.51595168 | 1.79724254  | -2.39903854 |
| H  | 1.32058253  | -0.10005829 | -1.86663601 |
| H  | -2.64746849 | -1.16857623 | -1.55953070 |
| H  | -3.10740244 | 1.32720351  | -1.24214455 |

**Name-TS1011:G=**

| Angstroms |            |             |             |
|-----------|------------|-------------|-------------|
| Atom      | X          | Y           | Z           |
| S         | 1.32243141 | -1.74088413 | -1.06115276 |
| Ni        | 2.38267377 | -0.19157025 | 0.09031011  |
| S         | 1.27125143 | -0.71505960 | 1.91449736  |
| C         | 1.89888786 | -1.02509652 | -2.68857842 |
| C         | 3.37050858 | -0.65215279 | -2.56194211 |
| H         | 1.29608851 | -0.13312662 | -2.92105300 |
| H         | 1.74341392 | -1.77376771 | -3.48314545 |
| C         | 1.75998864 | 0.86479464  | 2.78489988  |
| C         | 3.21486088 | 1.17869345  | 2.46422497  |
| H         | 1.61635165 | 0.73034094  | 3.86955420  |
| H         | 1.10343431 | 1.68394292  | 2.44369240  |
| N         | 3.49153745 | 0.31337273  | -1.43275638 |

|    |             |             |             |
|----|-------------|-------------|-------------|
| N  | 3.33286332  | 1.26088959  | 0.98303592  |
| H  | 3.76039507  | -0.20273053 | -3.49566884 |
| H  | 3.98167770  | -1.53649738 | -2.31819865 |
| C  | 4.84283441  | 0.49687055  | -0.84154591 |
| C  | 4.71454406  | 1.39105778  | 0.41053254  |
| H  | 5.44496899  | 1.06624949  | 1.16680983  |
| H  | 4.90953101  | 2.45118237  | 0.17814887  |
| H  | 5.20108970  | -0.50403614 | -0.55371352 |
| H  | 5.55211680  | 0.92485156  | -1.57495013 |
| P  | -1.66561299 | 0.11055384  | -1.46952146 |
| P  | -1.68941656 | 0.90167933  | 1.12345011  |
| C  | -1.23253119 | -1.96995755 | 0.60882139  |
| N  | -1.81055742 | -2.97980577 | 0.92314310  |
| H  | 3.87754749  | 0.36926435  | 2.81163092  |
| H  | 3.53993898  | 2.12718710  | 2.93508692  |
| N  | -2.22574827 | 2.81322505  | -0.87095410 |
| C  | -2.10548312 | 4.21335515  | -1.29877274 |
| H  | -1.04635716 | 4.54216410  | -1.39934970 |
| H  | -2.59918231 | 4.87159180  | -0.56445820 |
| H  | -2.59973336 | 4.34885723  | -2.27522228 |
| C  | -3.42717381 | 0.37184650  | 0.65645154  |
| C  | -3.41870767 | -0.06373380 | -0.82968038 |
| C  | -1.80892368 | 1.17290734  | 2.94809613  |
| H  | -1.77949903 | 0.19612967  | 3.45647376  |
| H  | -2.75310633 | 1.68742529  | 3.19418834  |
| H  | -0.96337596 | 1.78265269  | 3.30173017  |
| C  | -1.71901142 | -0.66162026 | -3.14710890 |
| H  | -0.82246254 | -0.37913496 | -3.71990711 |
| H  | -2.61816774 | -0.33416623 | -3.69593087 |
| H  | -1.73395789 | -1.75708908 | -3.03228966 |
| H  | -3.69884067 | -1.12418034 | -0.94276616 |
| H  | -4.10467368 | 0.53828450  | -1.44874687 |
| H  | -4.14214721 | 1.18770276  | 0.85541612  |
| H  | -3.67826603 | -0.47378130 | 1.31752692  |
| O  | 1.55448071  | 2.09435346  | -1.88024240 |
| C  | 1.32050573  | 2.30261552  | -0.71443999 |
| H  | 0.68594805  | 0.94193734  | -0.28419054 |
| Fe | -0.30326907 | -0.40809381 | 0.12138779  |
| O  | 1.37999326  | 2.91245657  | 0.32916439  |
| C  | -1.65029313 | 1.93595585  | -1.90852057 |
| H  | -0.59391048 | 2.18611012  | -2.14163393 |
| H  | -2.23919127 | 2.08472588  | -2.83166893 |
| C  | -1.66286662 | 2.66412533  | 0.48449224  |
| H  | -2.26468883 | 3.29807918  | 1.16054703  |
| H  | -0.60151877 | 2.99904306  | 0.56060478  |
| H  | 3.14892454  | 1.22378292  | -1.77085195 |
| H  | 2.78706360  | 2.08517105  | 0.69018044  |

**3. Optimized geometries of complexes involved in splitting of  $\text{CO}_3^{2-}$ ,  $\text{HCO}_3^-$ ,  $\text{HCO}_3\text{H}$  with their computed thermodynamic data.**

**Name-CO<sub>3</sub><sup>2-</sup>**:G= -263.852919//H= -263.823735//SPE=-263.840367

Angstroms

| Atom | X          | Y           | Z           |
|------|------------|-------------|-------------|
| C    | 0.00000000 | 0.00000000  | -0.00160500 |
| O    | 0.00000000 | 0.00000000  | 1.31557000  |
| O    | 0.00000000 | 1.14010800  | -0.65718300 |
| O    | 0.00000000 | -1.14010800 | -0.65718300 |

**Name-HCO<sub>3</sub><sup>-</sup>**:G= -264.320533//H= -264.290198//SPE=-264.3201271

Angstroms

| Atom | X           | Y           | Z           |
|------|-------------|-------------|-------------|
| C    | -0.13024400 | 0.04980300  | -0.00006500 |
| O    | -1.16804400 | -0.67610600 | 0.00003200  |
| O    | -0.03898900 | 1.31700400  | 0.00000800  |
| O    | 1.07935000  | -0.67626400 | -0.00002100 |
| H    | 1.80292900  | -0.01589500 | 0.00024100  |

**Name-HCO<sub>3</sub>H**:G= -264.755925//H= -264.725056//SPE=-264.7670189

Angstroms

| Atom | X           | Y           | Z           |
|------|-------------|-------------|-------------|
| C    | 0.04392500  | 0.12191400  | -0.00004100 |
| O    | 0.62028900  | 1.20653600  | 0.00007200  |
| O    | -1.30111600 | 0.02842000  | -0.00012200 |
| H    | -1.57907700 | -0.91343100 | 0.00075400  |
| O    | 0.64333900  | -1.09301400 | 0.00003400  |
| H    | 1.61543100  | -0.95359200 | -0.00037500 |

**Name-H<sub>2</sub>O**:G=-76.359441//H= -76.337974//SPE=-76.3623209

Angstroms

| Atom | X          | Y           | Z           |
|------|------------|-------------|-------------|
| O    | 0.00000000 | 0.00000000  | 0.12037000  |
| H    | 0.00000000 | 0.76754500  | -0.48148200 |
| H    | 0.00000000 | -0.76754500 | -0.48148200 |

**Name-NiFe16**:G= -2921.402683//H= -2921.301231//SPE=-2921.8637091

Angstroms

| Atom | X | Y | Z |
|------|---|---|---|
|------|---|---|---|

|    |             |             |             |
|----|-------------|-------------|-------------|
| S  | -0.85549700 | -0.53368000 | -2.08779100 |
| Ni | -2.08852600 | 0.39076400  | -0.53393000 |
| Fe | 0.93216400  | 0.37459000  | -0.63796000 |
| S  | -0.73063200 | 2.10398700  | -0.48742400 |
| C  | -1.66053100 | -2.20246100 | -1.88998600 |
| C  | -3.15233400 | -1.96171000 | -1.69026200 |
| H  | -1.20334800 | -2.74100400 | -1.04580800 |
| H  | -1.48933200 | -2.78496500 | -2.81064800 |
| C  | -1.31556300 | 2.65506700  | 1.18840000  |
| C  | -2.83395400 | 2.51676000  | 1.19199100  |
| H  | -1.02393800 | 3.70791600  | 1.33727700  |
| H  | -0.83743800 | 2.04670700  | 1.97217400  |
| N  | -3.36892500 | -1.08869300 | -0.49064700 |
| N  | -3.21027700 | 1.09343500  | 0.90567600  |
| H  | -3.70720400 | -2.91293800 | -1.56432800 |
| H  | -3.56378400 | -1.43174000 | -2.56413900 |
| C  | -4.68741700 | -0.37509300 | -0.49088100 |
| C  | -4.59392300 | 0.93183900  | 0.35308900  |
| H  | -4.78164800 | 1.79636600  | -0.29912000 |
| H  | -5.33864700 | 0.95238500  | 1.17052900  |
| H  | -4.91256100 | -0.11572600 | -1.53503700 |
| H  | -5.48550700 | -1.04810000 | -0.12548200 |
| C  | -3.18865300 | -1.89517500 | 0.76221800  |
| C  | -3.01169200 | 0.26126100  | 2.14198100  |
| H  | -1.92942800 | 0.20381300  | 2.33154800  |
| H  | -3.49014200 | 0.78730000  | 2.99087600  |
| H  | -3.80088700 | -2.81369700 | 0.67010400  |
| H  | -2.13099700 | -2.19300100 | 0.81623600  |
| C  | -3.61092700 | -1.13697200 | 2.01783900  |
| P  | 2.58485600  | -1.02756400 | -0.89383500 |
| P  | 2.57080100  | 1.38067300  | 0.38669200  |
| C  | 1.39669700  | 1.21566000  | -2.20280600 |
| N  | 1.66649600  | 1.77611700  | -3.23357800 |
| H  | -3.26546500 | 3.14250100  | 0.39446700  |
| H  | -3.27378700 | 2.83192000  | 2.15878300  |
| N  | 3.98105100  | -0.74771400 | 1.54346600  |
| C  | 4.41183700  | -1.40995400 | 2.78393200  |
| H  | 3.55256000  | -1.78151500 | 3.38771700  |
| H  | 4.98941100  | -0.70315100 | 3.40263800  |
| H  | 5.05951000  | -2.26895100 | 2.54147700  |
| C  | 4.07444200  | 1.31602700  | -0.72283000 |
| C  | 4.07193800  | -0.04533500 | -1.46908300 |
| C  | 2.46972200  | 3.11214100  | 1.00361500  |
| H  | 2.10753600  | 3.75806900  | 0.18835200  |
| H  | 3.45633300  | 3.46345200  | 1.34914700  |
| H  | 1.75057400  | 3.15572000  | 1.83746000  |
| C  | 2.50542500  | -2.50212000 | -1.99337700 |
| H  | 1.73951800  | -3.19210200 | -1.60490900 |
| H  | 3.47975400  | -3.01561100 | -2.04936500 |
| H  | 2.20202400  | -2.16765300 | -2.99836200 |
| H  | -3.28291700 | -1.72240600 | 2.89277200  |
| H  | -4.71097300 | -1.08427700 | 2.07722200  |

|   |             |             |             |
|---|-------------|-------------|-------------|
| H | 3.97108200  | 0.09642700  | -2.55652900 |
| H | 4.99031000  | -0.62515600 | -1.28013600 |
| H | 4.98420800  | 1.46033000  | -0.11773600 |
| H | 3.99211700  | 2.15898200  | -1.42709600 |
| O | 0.20658400  | -2.66710400 | 1.00151700  |
| O | 0.25995300  | -0.38304700 | 1.17258800  |
| O | -0.05922200 | -1.63511000 | 3.00721000  |
| C | 0.13986100  | -1.58004700 | 1.71272900  |
| C | 3.28652100  | -1.73909600 | 0.69487000  |
| H | 2.45749900  | -2.25469700 | 1.22080100  |
| H | 4.02667900  | -2.50728500 | 0.40601900  |
| C | 3.18262100  | 0.44322200  | 1.88869300  |
| H | 3.82685800  | 1.12292100  | 2.47390100  |
| H | 2.28637600  | 0.20287000  | 2.50104500  |

**Name-NiFe14:**G= -2921.503743//H= -2921.758483//SPE =-2922.3340528

Angstroms

| Atom | X           | Y           | Z           |
|------|-------------|-------------|-------------|
| S    | -0.79273700 | -0.18478300 | -2.10129200 |
| Ni   | -2.08711700 | 0.47261300  | -0.46535500 |
| Fe   | 0.95007200  | 0.49518500  | -0.56408600 |
| S    | -0.73835200 | 2.15132400  | -0.11157000 |
| C    | -1.54915200 | -1.88598800 | -2.15508200 |
| C    | -3.05514000 | -1.69778500 | -2.00012400 |
| H    | -1.11382000 | -2.51519200 | -1.36423100 |
| H    | -1.31906100 | -2.34023000 | -3.13304400 |
| C    | -1.39999000 | 2.46481200  | 1.60250000  |
| C    | -2.91597600 | 2.32088700  | 1.51268100  |
| H    | -1.12981100 | 3.49195100  | 1.89823500  |
| H    | -0.95729400 | 1.77439000  | 2.33745400  |
| N    | -3.34961400 | -0.99844700 | -0.70364400 |
| N    | -3.27541600 | 0.95360300  | 1.00887600  |
| H    | -3.59115800 | -2.66651800 | -2.03040100 |
| H    | -3.43785800 | -1.06408300 | -2.81591600 |
| C    | -4.66599400 | -0.27991600 | -0.67944200 |
| C    | -4.62615500 | 0.88286100  | 0.35991700  |
| H    | -4.78083900 | 1.83697500  | -0.16294600 |
| H    | -5.41453700 | 0.78129300  | 1.12833200  |
| H    | -4.82141700 | 0.14047500  | -1.68301800 |
| H    | -5.48642300 | -0.99195600 | -0.47307100 |
| C    | -3.25072100 | -1.98120500 | 0.42656300  |
| C    | -3.14944700 | -0.05034500 | 2.11977300  |
| H    | -2.08296200 | -0.13691300 | 2.37287800  |
| H    | -3.68173300 | 0.34869500  | 3.00467000  |
| H    | -3.86598100 | -2.86403900 | 0.16594000  |
| H    | -2.20400900 | -2.30731200 | 0.49065200  |
| C    | -3.73460100 | -1.41297600 | 1.75739400  |
| P    | 2.60330300  | -0.85331500 | -1.07127100 |
| P    | 2.60447300  | 1.31620300  | 0.60682700  |



|   |             |             |             |
|---|-------------|-------------|-------------|
| C | 1.41811200  | 1.60021400  | -1.93617900 |
| N | 1.68802200  | 2.33617500  | -2.84678800 |
| H | -3.31196900 | 3.05401800  | 0.79214000  |
| H | -3.39991500 | 2.49856900  | 2.49292600  |
| N | 3.99732400  | -0.98399000 | 1.38403200  |
| C | 4.43263900  | -1.84837200 | 2.49197200  |
| H | 3.57330100  | -2.29876600 | 3.03870600  |
| H | 5.03087200  | -1.26161300 | 3.20839600  |
| H | 5.06049900  | -2.66548100 | 2.10031100  |
| C | 4.09645900  | 1.41804000  | -0.51673800 |
| C | 4.08744100  | 0.20167900  | -1.48129500 |
| C | 2.51520000  | 2.93609800  | 1.46865800  |
| H | 2.15659600  | 3.69114100  | 0.75139700  |
| H | 3.50487900  | 3.22857800  | 1.85663400  |
| H | 1.79634700  | 2.86632900  | 2.30056200  |
| C | 2.48383000  | -2.13666600 | -2.37961500 |
| H | 1.73219400  | -2.88257400 | -2.07510600 |
| H | 3.45586400  | -2.62970900 | -2.54575900 |
| H | 2.14599800  | -1.65227100 | -3.30932200 |
| H | -3.45159800 | -2.12369600 | 2.55145900  |
| H | -4.83603400 | -1.36208200 | 1.76742700  |
| H | 3.98447100  | 0.52357900  | -2.52937500 |
| H | 5.00210600  | -0.40676900 | -1.39324400 |
| H | 5.01035700  | 1.45754900  | 0.09722600  |
| H | 4.01112000  | 2.36604800  | -1.07083500 |
| O | 0.14997900  | -2.90607400 | 0.62296000  |
| O | 0.22274200  | -0.68705100 | 1.07956700  |
| O | -0.05872900 | -2.16167700 | 2.77936800  |
| C | 0.09829100  | -2.03790800 | 1.53034100  |
| C | 3.27687500  | -1.80960400 | 0.39516600  |
| H | 2.43569600  | -2.37804400 | 0.83990700  |
| H | 3.99285300  | -2.54750300 | -0.00863500 |
| C | 3.22932300  | 0.14768900  | 1.93260700  |
| H | 3.90095600  | 0.72210100  | 2.59485300  |
| H | 2.35781200  | -0.17617900 | 2.54440400  |
| H | 0.17258300  | -0.12878800 | 1.88194900  |

**Name-NiFe17:**G= -2733.098274//H= -2733.339512//SPE =-2733.8965121

Angstroms

| Atom | X           | Y           | Z           |
|------|-------------|-------------|-------------|
| S    | 0.70070000  | 1.54230000  | -1.44068100 |
| Ni   | 1.98162100  | -0.00000700 | -0.55773600 |
| Fe   | -0.99177900 | -0.00013900 | -0.60423700 |
| S    | 0.70074800  | -1.54233100 | -1.44072800 |
| C    | 1.36034100  | 2.86006700  | -0.30979900 |
| C    | 2.87078600  | 2.66950600  | -0.22389700 |
| H    | 0.86916500  | 2.77850600  | 0.67336600  |
| H    | 1.12200400  | 3.84905500  | -0.73567700 |
| C    | 1.36038900  | -2.86008600 | -0.30982700 |

|   |             |             |             |
|---|-------------|-------------|-------------|
| C | 2.87083000  | -2.66949700 | -0.22383300 |
| H | 1.12209800  | -3.84908200 | -0.73571400 |
| H | 0.86915500  | -2.77854100 | 0.67331000  |
| N | 3.17565300  | 1.29733100  | 0.29996000  |
| N | 3.17567400  | -1.29730000 | 0.30000100  |
| H | 3.34595100  | 3.43160500  | 0.42530300  |
| H | 3.31105300  | 2.74999700  | -1.23065500 |
| C | 4.52798500  | 0.78022400  | -0.08996200 |
| C | 4.52799500  | -0.78017600 | -0.08994200 |
| H | 4.72571400  | -1.14105900 | -1.10907700 |
| H | 5.30573800  | -1.19480100 | 0.57848700  |
| H | 4.72571000  | 1.14108400  | -1.10910400 |
| H | 5.30571600  | 1.19488000  | 0.57846100  |
| C | 2.99178500  | 1.28099200  | 1.78971600  |
| C | 2.99181900  | -1.28091600 | 1.78975500  |
| H | 1.91738700  | -1.41023800 | 1.98865300  |
| H | 3.53500200  | -2.14752100 | 2.21380300  |
| H | 3.53493700  | 2.14763100  | 2.21373100  |
| H | 1.91734400  | 1.41029500  | 1.98858700  |
| C | 3.50741500  | 0.00005600  | 2.43761000  |
| P | -2.59172100 | 1.36384600  | -0.04453900 |
| P | -2.59180600 | -1.36392000 | -0.04433100 |
| C | -1.58006800 | -0.00005100 | -2.35343300 |
| N | -1.93172600 | 0.00000500  | -3.50592700 |
| H | 3.31116000  | -2.75000900 | -1.23056100 |
| H | 3.34596700  | -3.43157200 | 0.42541500  |
| N | -2.64676300 | 0.00026600  | 2.42386800  |
| C | -3.04485300 | 0.00040300  | 3.83795800  |
| H | -2.63874900 | 0.89526800  | 4.33771700  |
| H | -2.63907100 | -0.89455900 | 4.33780200  |
| H | -4.15098200 | 0.00061000  | 3.96281200  |
| C | -4.16362500 | -0.77490800 | -0.87491200 |
| C | -4.16368500 | 0.77468400  | -0.87480800 |
| C | -2.59205200 | -3.18633800 | -0.30930000 |
| H | -2.44716500 | -3.38322000 | -1.38349900 |
| H | -3.54437300 | -3.63370700 | 0.02247500  |
| H | -1.75759900 | -3.63559700 | 0.25206400  |
| C | -2.59184900 | 3.18615500  | -0.31018500 |
| H | -1.75726300 | 3.63555100  | 0.25087500  |
| H | -3.54407500 | 3.63374100  | 0.02157000  |
| H | -2.44711400 | 3.38259300  | -1.38448400 |
| H | 3.18633800  | 0.00006800  | 3.49256500  |
| H | 4.61006500  | 0.00007100  | 2.45343900  |
| H | -4.15954200 | 1.17364500  | -1.90132600 |
| H | -5.03580300 | 1.19413000  | -0.34570000 |
| H | -5.03583300 | -1.19450000 | -0.34606400 |
| H | -4.15918100 | -1.17373100 | -1.90148100 |
| O | -0.13261900 | -0.00036000 | 1.24339500  |
| H | -0.90493700 | -0.00006400 | 1.86210600  |
| C | -3.09543200 | 1.24171600  | 1.77191300  |
| H | -2.62398700 | 2.08797900  | 2.30104400  |
| H | -4.20011000 | 1.37814800  | 1.83685400  |

|   |             |             |            |
|---|-------------|-------------|------------|
| C | -3.09575700 | -1.24113600 | 1.77203700 |
| H | -4.20049200 | -1.37718200 | 1.83683800 |
| H | -2.62470200 | -2.08746900 | 2.30140600 |

**Name-NiFe18:**G= -2733.198073//H= -2733.805924//SPE=-2734.3769589

Angstroms

| Atom | X           | Y           | Z           |
|------|-------------|-------------|-------------|
| S    | 0.73282000  | 1.50303900  | -1.40757500 |
| Ni   | 2.04564200  | 0.00375600  | -0.50350500 |
| Fe   | -0.94204700 | -0.02441800 | -0.63429100 |
| S    | 0.77260800  | -1.55423000 | -1.36049300 |
| C    | 1.33491800  | 2.84385000  | -0.26667300 |
| C    | 2.85042100  | 2.69324700  | -0.17458900 |
| H    | 0.84022000  | 2.75388000  | 0.71303300  |
| H    | 1.07121500  | 3.82323900  | -0.69863500 |
| C    | 1.45511600  | -2.86469000 | -0.22457600 |
| C    | 2.96371700  | -2.64277700 | -0.15723000 |
| H    | 1.23177800  | -3.85461900 | -0.65530400 |
| H    | 0.97569100  | -2.80781100 | 0.76594500  |
| N    | 3.19353200  | 1.33086000  | 0.35419800  |
| N    | 3.25264900  | -1.26526900 | 0.36505900  |
| H    | 3.29853000  | 3.47080000  | 0.47434700  |
| H    | 3.29306800  | 2.78383600  | -1.17939200 |
| C    | 4.55844500  | 0.84332700  | -0.03427300 |
| C    | 4.59118100  | -0.71815200 | -0.03796700 |
| H    | 4.78582000  | -1.07312100 | -1.05969100 |
| H    | 5.38317900  | -1.11698900 | 0.62278400  |
| H    | 4.74988200  | 1.21049800  | -1.05221900 |
| H    | 5.32521800  | 1.27298700  | 0.63647500  |
| C    | 3.00550700  | 1.31024900  | 1.84436200  |
| C    | 3.08960200  | -1.25267300 | 1.85683300  |
| H    | 2.02845600  | -1.43330700 | 2.07804900  |
| H    | 3.67442300  | -2.09550600 | 2.27246100  |
| H    | 3.52011200  | 2.19410500  | 2.26745300  |
| H    | 1.92818900  | 1.40780500  | 2.04303200  |
| C    | 3.56261100  | 0.04879000  | 2.49622300  |
| P    | -2.56487400 | 1.35233000  | -0.14544700 |
| P    | -2.54336000 | -1.39101900 | -0.04179000 |
| C    | -1.50966500 | -0.07282100 | -2.36840600 |
| N    | -1.84064200 | -0.10554300 | -3.52327900 |
| H    | 3.39359100  | -2.71497500 | -1.16892200 |
| H    | 3.45679200  | -3.39836300 | 0.48522000  |
| N    | -3.75054600 | 0.05751300  | 2.04924700  |
| C    | -4.07547200 | 0.11029900  | 3.48210900  |

|   |             |             |             |
|---|-------------|-------------|-------------|
| H | -3.16362000 | 0.14746500  | 4.12066200  |
| H | -4.65978200 | -0.78091700 | 3.76354500  |
| H | -4.68246000 | 1.00606800  | 3.69235400  |
| C | -4.11195300 | -0.83981700 | -0.89092500 |
| C | -4.12358200 | 0.71048600  | -0.95053400 |
| C | -2.46109500 | -3.21558100 | -0.24178100 |
| H | -2.16268800 | -3.44120300 | -1.27759100 |
| H | -3.43695400 | -3.68000200 | -0.02322600 |
| H | -1.69830500 | -3.61859100 | 0.44350300  |
| C | -2.51341300 | 3.15458200  | -0.49972700 |
| H | -1.75945900 | 3.63117700  | 0.14709500  |
| H | -3.49854500 | 3.61656400  | -0.32176500 |
| H | -2.21949800 | 3.29443300  | -1.55192400 |
| H | 3.24578400  | 0.04362000  | 3.55225600  |
| H | 4.66448400  | 0.08422600  | 2.50811900  |
| H | -4.11732700 | 1.06988800  | -1.99155800 |
| H | -5.00030300 | 1.14242600  | -0.44150100 |
| H | -4.98277700 | -1.24496100 | -0.35054700 |
| H | -4.09889400 | -1.27856600 | -1.90123100 |
| O | -0.05379000 | 0.00490800  | 1.29526200  |
| C | -3.06936500 | 1.30214100  | 1.66035100  |
| H | -2.17079100 | 1.52377200  | 2.28436000  |
| H | -3.77121900 | 2.13846000  | 1.82693700  |
| C | -3.02573600 | -1.19238800 | 1.76188200  |
| H | -3.69354000 | -2.03374200 | 2.01782000  |
| H | -2.10725400 | -1.30714300 | 2.38182900  |
| H | -0.10782100 | -0.88055300 | 1.70579300  |
| H | -0.46535000 | 0.60356000  | 1.94864000  |

**Name-TS1417:**G= -2921.496042//H= -2921.223735//SPE=-2922.2312120

Angstroms

| Atom | X           | Y           | Z           |
|------|-------------|-------------|-------------|
| S    | 0.76344300  | 2.17399300  | 0.32497400  |
| Ni   | 2.11491300  | 0.59660100  | -0.36675900 |
| Fe   | -1.00040800 | 0.65912600  | -0.43464200 |
| S    | 0.80232600  | 0.27038200  | -2.08426100 |
| C    | 1.44428000  | 2.14304400  | 2.05808400  |
| C    | 2.95998300  | 2.02480100  | 1.93783700  |
| H    | 1.00112300  | 1.31317000  | 2.63148100  |
| H    | 1.17419200  | 3.08845500  | 2.55783700  |
| C    | 1.56994400  | -1.38134500 | -2.48621600 |
| C    | 3.07667100  | -1.23539600 | -2.29369700 |
| H    | 1.34701400  | -1.62207500 | -3.53917800 |
| H    | 1.13611900  | -2.17176500 | -1.85486200 |
| N    | 3.31599400  | 0.78566600  | 1.16809400  |
| N    | 3.38003900  | -0.80624400 | -0.88800900 |
| H    | 3.44712300  | 1.99600900  | 2.93222900  |
| H    | 3.35611400  | 2.88940200  | 1.38208300  |

|   |             |             |             |
|---|-------------|-------------|-------------|
| C | 4.66196200  | 0.84413500  | 0.50557700  |
| C | 4.69858900  | -0.10644300 | -0.73111800 |
| H | 4.85996000  | 0.48859400  | -1.64127600 |
| H | 5.51713800  | -0.84650800 | -0.65793200 |
| H | 4.80887300  | 1.88058800  | 0.16964000  |
| H | 5.45828400  | 0.60468200  | 1.23421000  |
| C | 3.20916100  | -0.41185300 | 2.07112400  |
| C | 3.28559200  | -1.98616800 | 0.03744400  |
| H | 2.23543300  | -2.31243500 | 0.04800000  |
| H | 3.89180100  | -2.80799900 | -0.39116900 |
| H | 3.75921500  | -0.18569000 | 3.00507300  |
| H | 2.14676300  | -0.54789500 | 2.32775900  |
| C | 3.78562200  | -1.67974200 | 1.44844700  |
| P | -2.63394200 | 1.18839800  | 0.90459900  |
| P | -2.65198200 | -0.52236300 | -1.22536100 |
| C | -1.43458700 | 2.05545500  | -1.55313600 |
| N | -1.67146200 | 2.97852300  | -2.28982800 |
| H | 3.46007000  | -0.45388300 | -2.96894800 |
| H | 3.60838300  | -2.18127000 | -2.51885100 |
| N | -4.01464700 | -1.24298800 | 1.13735300  |
| C | -4.43759400 | -2.34144800 | 2.01904300  |
| H | -3.57387700 | -2.90851900 | 2.43525500  |
| H | -5.07387900 | -3.04568200 | 1.45764600  |
| H | -5.02413600 | -1.93818000 | 2.86086900  |
| C | -4.14419500 | 0.59932900  | -1.35693400 |
| C | -4.15091800 | 1.54826400  | -0.12866900 |
| C | -2.58231800 | -1.46606300 | -2.80663200 |
| H | -2.29862800 | -0.77761500 | -3.61870400 |
| H | -3.55655500 | -1.92867100 | -3.03750500 |
| H | -1.81087900 | -2.24902300 | -2.72198300 |
| C | -2.55194400 | 2.54802600  | 2.14496600  |
| H | -1.79897000 | 2.29914200  | 2.90991200  |
| H | -3.53157600 | 2.69929900  | 2.62860600  |
| H | -2.24524700 | 3.47490100  | 1.63495800  |
| H | 3.51457100  | -2.53053900 | 2.09594300  |
| H | 4.88733100  | -1.63159900 | 1.45123300  |
| H | -4.09661600 | 2.60450700  | -0.43788600 |
| H | -5.05350200 | 1.42044700  | 0.49072800  |
| H | -5.06363300 | -0.00544900 | -1.42381900 |
| H | -4.03866200 | 1.16575900  | -2.29594400 |
| O | 0.09219600  | -3.12041000 | 2.28346000  |
| O | -0.34059600 | -0.83715800 | 0.83611000  |
| O | -0.14706000 | -3.54586000 | -0.02248300 |
| C | -0.05597000 | -3.16107700 | 1.10206800  |
| C | -3.23875200 | -0.26472200 | 1.92399300  |
| H | -2.34880400 | -0.71658600 | 2.41568700  |
| H | -3.90020200 | 0.12824000  | 2.71660900  |
| C | -3.30082500 | -1.81151900 | -0.02386800 |
| H | -4.01167700 | -2.45296900 | -0.57480300 |
| H | -2.44573300 | -2.44847600 | 0.28015900  |
| H | 0.61867700  | -0.71392600 | 0.66706300  |

Name-TS18:G= -2733.197363//H= -2733.023735//SPE =-2733.840367

|      | Angstroms   |             |             |
|------|-------------|-------------|-------------|
| Atom | X           | Y           | Z           |
| S    | 0.75587714  | 1.49883140  | -1.60740117 |
| Ni   | 2.06869914  | -0.00045160 | -0.70333117 |
| Fe   | -0.91898986 | -0.02862560 | -0.83411717 |
| S    | 0.79566514  | -1.55843760 | -1.56031917 |
| C    | 1.35797514  | 2.83964240  | -0.46649917 |
| C    | 2.87347814  | 2.68903940  | -0.37441517 |
| H    | 0.86327714  | 2.74967240  | 0.51320683  |
| H    | 1.09427214  | 3.81903140  | -0.89846117 |
| C    | 1.47817314  | -2.86889760 | -0.42440217 |
| C    | 2.98677414  | -2.64698460 | -0.35705617 |
| H    | 1.25483514  | -3.85882660 | -0.85513017 |
| H    | 0.99874814  | -2.81201860 | 0.56611883  |
| N    | 3.21658914  | 1.32665240  | 0.15437183  |
| N    | 3.27570614  | -1.26947660 | 0.16523283  |
| H    | 3.32158714  | 3.46659240  | 0.27452083  |
| H    | 3.31612514  | 2.77962840  | -1.37921817 |
| C    | 4.58150214  | 0.83911940  | -0.23409917 |
| C    | 4.61423814  | -0.72235960 | -0.23779317 |
| H    | 4.80887714  | -1.07732860 | -1.25951717 |
| H    | 5.40623614  | -1.12119660 | 0.42295783  |
| H    | 4.77293914  | 1.20629040  | -1.25204517 |
| H    | 5.34827514  | 1.26877940  | 0.43664883  |
| C    | 3.02856414  | 1.30604140  | 1.64453583  |
| C    | 3.11265914  | -1.25688060 | 1.65700683  |
| H    | 2.05151314  | -1.43751460 | 1.87822283  |
| H    | 3.69748014  | -2.09971360 | 2.07263483  |
| H    | 3.54316914  | 2.18989740  | 2.06762683  |
| H    | 1.95124614  | 1.40359740  | 1.84320583  |
| C    | 3.58566814  | 0.04458240  | 2.29639683  |
| P    | -2.54181686 | 1.34812240  | -0.34527317 |
| P    | -2.52030286 | -1.39522660 | -0.24161617 |
| C    | -1.48660786 | -0.07702860 | -2.56823217 |
| N    | -1.81758486 | -0.10975060 | -3.72310517 |
| H    | 3.41664814  | -2.71918260 | -1.36874817 |
| H    | 3.47984914  | -3.40257060 | 0.28539383  |
| N    | -3.72748886 | 0.05330540  | 1.84942083  |
| C    | -4.05241486 | 0.10609140  | 3.28228283  |
| H    | -3.14056286 | 0.14325740  | 3.92083583  |
| H    | -4.63672486 | -0.78512460 | 3.56371883  |
| H    | -4.65940286 | 1.00186040  | 3.49252783  |
| C    | -4.08889586 | -0.84402460 | -1.09075117 |
| C    | -4.10052486 | 0.70627840  | -1.15036017 |
| C    | -2.43803786 | -3.21978860 | -0.44160717 |
| H    | -2.13963086 | -3.44541060 | -1.47741717 |
| H    | -3.41389686 | -3.68420960 | -0.22305217 |

|   |             |             |             |
|---|-------------|-------------|-------------|
| H | -1.67524786 | -3.62279860 | 0.24367683  |
| C | -2.49035586 | 3.15037440  | -0.69955317 |
| H | -1.73640186 | 3.62696940  | -0.05273117 |
| H | -3.47548786 | 3.61235640  | -0.52159117 |
| H | -2.19644086 | 3.29022540  | -1.75175017 |
| H | 3.26884114  | 0.03941240  | 3.35242983  |
| H | 4.68754114  | 0.08001840  | 2.30829283  |
| H | -4.09426986 | 1.06568040  | -2.19138417 |
| H | -4.97724586 | 1.13821840  | -0.64132717 |
| H | -4.95971986 | -1.24916860 | -0.55037317 |
| H | -4.07583686 | -1.28277360 | -2.10105717 |
| O | -0.07684714 | 0.00911560  | 1.49508817  |
| C | -3.04630786 | 1.29793340  | 1.46052483  |
| H | -2.14773386 | 1.51956440  | 2.08453383  |
| H | -3.74816186 | 2.13425240  | 1.62711083  |
| C | -3.00267886 | -1.19659560 | 1.56205583  |
| H | -3.67048286 | -2.03794960 | 1.81799383  |
| H | -2.08419686 | -1.31135060 | 2.18200283  |
| H | -0.13087814 | -0.87634540 | 1.90561917  |
| H | -0.48840714 | 0.60776760  | 2.14846617  |

**Name-NiFe15:**G=-2921.865157//H=-2921.762188//SPE=-2922.3375238  
 Angstroms

| Atom | X           | Y           | Z           |
|------|-------------|-------------|-------------|
| S    | -0.83795403 | -0.48282843 | -2.07816113 |
| Ni   | -2.08609979 | 0.41410262  | -0.52249261 |
| Fe   | 0.94510709  | 0.40371151  | -0.62801039 |
| S    | -0.71621866 | 2.11441018  | -0.42804467 |
| C    | -1.66663067 | -2.14640446 | -1.93828863 |
| C    | -3.15846029 | -1.88499783 | -1.75989629 |
| H    | -1.23584295 | -2.71826087 | -1.10310916 |
| H    | -1.48772433 | -2.70312866 | -2.87313495 |
| C    | -1.29144942 | 2.61370733  | 1.26725608  |
| C    | -2.81192390 | 2.49756080  | 1.26239508  |
| H    | -0.98427542 | 3.65587105  | 1.45428372  |
| H    | -0.82324788 | 1.97043964  | 2.02843044  |
| N    | -3.38583110 | -1.04713082 | -0.53648554 |
| N    | -3.20938716 | 1.09010684  | 0.92574758  |
| H    | -3.73044674 | -2.83049742 | -1.67665156 |
| H    | -3.54384926 | -1.32048324 | -2.62381928 |
| C    | -4.68962833 | -0.30595849 | -0.54066437 |
| C    | -4.58930690 | 0.96786480  | 0.35278554  |
| H    | -4.75834487 | 1.85836091  | -0.26868985 |
| H    | -5.34257287 | 0.96848183  | 1.16225477  |
| H    | -4.88525874 | -0.00465659 | -1.57945108 |
| H    | -5.50883264 | -0.97489030 | -0.21701934 |
| C    | -3.25553522 | -1.89845785 | 0.69171880  |
| C    | -3.03619037 | 0.21587368  | 2.13664139  |

|   |             |             |             |
|---|-------------|-------------|-------------|
| H | -1.95717584 | 0.13649497  | 2.33512794  |
| H | -3.51161563 | 0.72396585  | 2.99776726  |
| H | -3.90186671 | -2.78829544 | 0.56168594  |
| H | -2.21371572 | -2.24193415 | 0.74578603  |
| C | -3.66383580 | -1.16510361 | 1.96719778  |
| P | 2.60332428  | -0.98950913 | -0.92878967 |
| P | 2.58111636  | 1.38070887  | 0.43807631  |
| C | 1.41467249  | 1.28263700  | -2.16243416 |
| N | 1.68534354  | 1.87308720  | -3.17456128 |
| H | -3.23248506 | 3.15724733  | 0.48681143  |
| H | -3.24849249 | 2.78480998  | 2.23890864  |
| N | 3.97910060  | -0.79449162 | 1.52373671  |
| C | 4.41026563  | -1.49817650 | 2.74112665  |
| H | 3.55081023  | -1.89706705 | 3.32693870  |
| H | 4.98022982  | -0.81026407 | 3.38715064  |
| H | 5.06461563  | -2.34317449 | 2.46979151  |
| C | 4.08694864  | 1.35293951  | -0.66620251 |
| C | 4.09119588  | 0.01644687  | -1.45572161 |
| C | 2.47534944  | 3.08595744  | 1.11886801  |
| H | 2.10965723  | 3.76096351  | 0.32925719  |
| H | 3.46276902  | 3.42497704  | 1.47385665  |
| H | 1.75935593  | 3.09653523  | 1.95638588  |
| C | 2.52475859  | -2.41781188 | -2.08436037 |
| H | 1.75315960  | -3.12041454 | -1.73173879 |
| H | 3.49793504  | -2.93152449 | -2.15317880 |
| H | 2.23114043  | -2.04098811 | -3.07718349 |
| H | -3.35691198 | -1.78313379 | 2.82721827  |
| H | -4.76249505 | -1.08742722 | 2.02077751  |
| H | 3.99760808  | 0.19335131  | -2.53855805 |
| H | 5.00868160  | -0.56807384 | -1.27866303 |
| H | 4.99377680  | 1.48037730  | -0.05324159 |
| H | 4.00415800  | 2.21785726  | -1.34315580 |
| O | 0.17717932  | -2.63541582 | 0.81111324  |
| O | 0.25686768  | -0.40934818 | 1.16835985  |
| C | 0.09807864  | -1.55891757 | 1.68872567  |
| C | 3.29438871  | -1.75752362 | 0.63860880  |
| H | 2.47416135  | -2.30078367 | 1.14989222  |
| H | 4.03825978  | -2.51197971 | 0.32464708  |
| C | 3.17556193  | 0.38066955  | 1.90646047  |
| H | 3.81290135  | 1.03699930  | 2.52479269  |
| H | 2.27550125  | 0.11766024  | 2.50360457  |
| H | 0.04936632  | -3.44397498 | 1.34943149  |
| O | -0.13091023 | -1.80035469 | 2.91133816  |

**Name-NiFe13:**G=-2922.297531//H=-2922.185922//SPE=-2922.7753945  
 Angstroms

| Atom | X           | Y           | Z          |
|------|-------------|-------------|------------|
| S    | -0.78966252 | 0.14659126  | 2.08231704 |
| Ni   | -2.09151364 | -0.49331382 | 0.44995180 |
| Fe   | 0.96114600  | -0.51134174 | 0.54750985 |
| S    | -0.72528619 | -2.14460814 | 0.05261115 |
| C    | -1.57633520 | 1.83122817  | 2.20616483 |



|   |             |             |             |
|---|-------------|-------------|-------------|
| C | -3.07950264 | 1.61852913  | 2.05240232  |
| H | -1.16039006 | 2.50668882  | 1.44589946  |
| H | -1.35068365 | 2.24662105  | 3.20207058  |
| C | -1.39221752 | -2.43523630 | -1.66475274 |
| C | -2.90912549 | -2.31239081 | -1.55768087 |
| H | -1.11218924 | -3.45434644 | -1.97818380 |
| H | -0.96404339 | -1.72882017 | -2.39292028 |
| N | -3.37315802 | 0.95108022  | 0.73849380  |
| N | -3.28370690 | -0.96074370 | -1.02212458 |
| H | -3.63198685 | 2.57616598  | 2.11512182  |
| H | -3.44439351 | 0.95479572  | 2.85210653  |
| C | -4.67953546 | 0.21365954  | 0.70512425  |
| C | -4.63029243 | -0.92445480 | -0.36065550 |
| H | -4.76622447 | -1.89197032 | 0.14217091  |
| H | -5.42581700 | -0.81826905 | -1.12084860 |
| H | -4.82272893 | -0.23184589 | 1.69954912  |
| H | -5.51073021 | 0.91880237  | 0.52043229  |
| C | -3.30087482 | 1.96278119  | -0.36660444 |
| C | -3.18126844 | 0.07095418  | -2.10965425 |
| H | -2.11895773 | 0.17217901  | -2.37538406 |
| H | -3.72026896 | -0.31230180 | -2.99734728 |
| H | -3.93264396 | 2.82635926  | -0.08226556 |
| H | -2.26302797 | 2.31421554  | -0.42440468 |
| C | -3.77962577 | 1.41810907  | -1.70927057 |
| P | 2.61902331  | 0.82640295  | 1.09215034  |
| P | 2.62340976  | -1.32169840 | -0.62374085 |
| C | 1.41583203  | -1.63980792 | 1.89626726  |
| N | 1.67251159  | -2.39605778 | 2.79280151  |
| H | -3.28840878 | -3.06548999 | -0.84882853 |
| H | -3.39898285 | -2.47733143 | -2.53700989 |
| N | 4.03544412  | 0.98178462  | -1.34701580 |
| C | 4.50471024  | 1.85616442  | -2.43308324 |
| H | 3.66286925  | 2.32827784  | -2.98864188 |
| H | 5.10694367  | 1.27082013  | -3.14704285 |
| H | 5.13748452  | 2.65710351  | -2.01697104 |
| C | 4.10431177  | -1.44290743 | 0.51119575  |
| C | 4.09189460  | -0.24254676 | 1.49562096  |
| C | 2.52825550  | -2.92741167 | -1.50808501 |
| H | 2.15382073  | -3.68853614 | -0.80554621 |
| H | 3.52007373  | -3.22340909 | -1.88752981 |
| H | 1.82038657  | -2.83857898 | -2.34747413 |
| C | 2.48746898  | 2.09060842  | 2.41591672  |
| H | 1.73241099  | 2.83652357  | 2.12021658  |
| H | 3.45634852  | 2.58645423  | 2.59122013  |
| H | 2.15031540  | 1.59109827  | 3.33778227  |
| H | -3.51108792 | 2.15125056  | -2.48775752 |
| H | -4.88021190 | 1.35286749  | -1.71471674 |
| H | 3.97647973  | -0.58124136 | 2.53702590  |
| H | 5.01008207  | 0.36284869  | 1.42661712  |
| H | 5.02203467  | -1.47390722 | -0.09722039 |
| H | 4.01366918  | -2.39931608 | 1.04959443  |
| O | 0.15289639  | 2.84865025  | -0.49177181 |

|   |             |             |             |
|---|-------------|-------------|-------------|
| O | 0.24589532  | 0.75133322  | -1.14401228 |
| C | 0.06075271  | 2.03167804  | -1.54522895 |
| C | 3.30738577  | 1.79912455  | -0.35976150 |
| H | 2.47878762  | 2.37926688  | -0.81344282 |
| H | 4.01996716  | 2.53073724  | 0.06073443  |
| C | 3.26673429  | -0.13408144 | -1.92466974 |
| H | 3.94283738  | -0.70372478 | -2.58634708 |
| H | 2.40754531  | 0.20607499  | -2.54534942 |
| H | 0.17946873  | 0.18880337  | -1.94594208 |
| H | 0.01815160  | 3.76813819  | -0.80973681 |
| O | -0.16387600 | 2.35400769  | -2.70960171 |

#### 4. Optimized geometries of CN substituted complexes with their corresponding thermodynamic energies.

**Name-NiFeF:**G= -2664.568453//H= -2664.477856//SPE =-2665.0137534

Angstroms

| Atom | X           | Y           | Z           |
|------|-------------|-------------|-------------|
| S    | -0.49035467 | -1.53360655 | -1.79543436 |
| Ni   | -1.65720794 | 0.00000780  | -0.75957974 |
| Fe   | 1.09632838  | 0.00001340  | -0.91992188 |
| S    | -0.49036088 | 1.53365430  | -1.79539603 |
| C    | -1.03999725 | -2.89496911 | -0.64553092 |
| C    | -2.51442594 | -2.66406807 | -0.34271626 |
| H    | -0.42914545 | -2.88423507 | 0.26872640  |
| H    | -0.89759387 | -3.86416817 | -1.14998751 |
| C    | -1.04003451 | 2.89498501  | -0.64546756 |
| C    | -2.51446482 | 2.66406306  | -0.34268353 |
| H    | -0.89763186 | 3.86419828  | -1.14989701 |
| H    | -0.42920610 | 2.88423545  | 0.26880437  |
| N    | -2.70946175 | -1.30093641 | 0.25193660  |
| N    | -2.70948427 | 1.30092235  | 0.25195320  |
| H    | -2.90663479 | -3.43277242 | 0.35105809  |
| H    | -3.09844847 | -2.70584497 | -1.27540091 |
| C    | -4.10768663 | -0.77881858 | 0.10224153  |
| C    | -4.10769996 | 0.77878322  | 0.10224546  |
| H    | -4.48276821 | 1.13690055  | -0.86649507 |
| H    | -4.75447646 | 1.19582891  | 0.89513633  |
| H    | -4.48275446 | -1.13693724 | -0.86649875 |
| H    | -4.75445119 | -1.19587960 | 0.89513416  |
| C    | -2.27532749 | -1.28667353 | 1.69077407  |
| C    | -2.27535549 | 1.28665147  | 1.69079133  |
| H    | -1.18387061 | 1.42841312  | 1.71635650  |
| H    | -2.74691069 | 2.15000813  | 2.19848259  |
| H    | -2.74685947 | -2.15004795 | 2.19845691  |
| H    | -1.18383930 | -1.42840908 | 1.71633295  |
| C    | -2.67481260 | -0.00002042 | 2.41143029  |
| P    | 2.39257053  | -1.39121840 | 0.16770266  |

|   |             |             |             |
|---|-------------|-------------|-------------|
| P | 2.39259527  | 1.39121234  | 0.16772421  |
| H | -3.09847159 | 2.70584302  | -1.27537780 |
| H | -2.90669484 | 3.43275336  | 0.35109439  |
| C | 1.97563607  | 1.22947419  | 1.98877028  |
| C | 1.97555074  | -1.22953188 | 1.98873816  |
| N | 1.21202854  | -0.00000684 | 2.24730502  |
| H | 1.33799693  | 2.09192896  | 2.24815740  |
| H | 2.90718609  | 1.29651688  | 2.59914999  |
| H | 1.33783714  | -2.09195134 | 2.24806076  |
| H | 2.90707433  | -1.29667423 | 2.59914829  |
| C | 0.70715792  | -0.00001122 | 3.62512593  |
| H | 0.08732034  | -0.89554751 | 3.79300033  |
| H | 0.08737451  | 0.89555738  | 3.79302742  |
| H | 1.52988455  | -0.00004763 | 4.37624788  |
| C | 4.14829336  | 0.77188588  | 0.04809630  |
| C | 4.14828414  | -0.77190230 | 0.04815405  |
| C | 2.57980805  | 3.20609553  | -0.07797497 |
| H | 2.86585635  | 3.38898511  | -1.12596647 |
| H | 3.36608020  | 3.59735840  | 0.58963130  |
| H | 1.63268259  | 3.72480056  | 0.13105775  |
| C | 2.57979156  | -3.20609923 | -0.07800805 |
| H | 1.63263062  | -3.72479371 | 0.13089305  |
| H | 3.36597288  | -3.59738028 | 0.58969487  |
| H | 2.86597450  | -3.38897730 | -1.12596464 |
| H | -2.18575355 | -0.00002264 | 3.39845979  |
| H | -3.75908024 | -0.00003421 | 2.61131544  |
| H | 4.56196577  | -1.17280246 | -0.89124063 |
| H | 4.73195979  | -1.19350163 | 0.88391361  |
| H | 4.73204446  | 1.19354362  | 0.88377382  |
| H | 4.56189728  | 1.17270893  | -0.89136541 |
| F | 2.25602426  | 0.00003208  | -2.46123506 |

**Name-NiFeH:**G= -2565.363622//H= -2565.276013//SPE =-2565.815279  
Angstroms

| Atom | X           | Y           | Z           |
|------|-------------|-------------|-------------|
| S    | -0.49747759 | -1.51253496 | -1.81910530 |
| Ni   | -1.65894797 | 0.00001692  | -0.75493069 |
| Fe   | 1.10344202  | -0.00011795 | -1.02702965 |
| S    | -0.49733818 | 1.51245859  | -1.81910236 |
| C    | -1.00649276 | -2.88800082 | -0.65639962 |
| C    | -2.47183353 | -2.66012935 | -0.30284248 |
| H    | -0.36217528 | -2.88571384 | 0.23508132  |
| H    | -0.88403316 | -3.85299512 | -1.17403733 |
| C    | -1.00617641 | 2.88794176  | -0.65633734 |
| C    | -2.47155312 | 2.66023985  | -0.30280430 |
| H    | -0.88358586 | 3.85294670  | -1.17392429 |
| H    | -0.36187942 | 2.88552752  | 0.23516106  |
| N    | -2.65198252 | -1.30084832 | 0.30435896  |
| N    | -2.65186442 | 1.30097330  | 0.30438369  |
| H    | -2.83932211 | -3.43501823 | 0.39829971  |

|   |             |             |             |
|---|-------------|-------------|-------------|
| H | -3.08581999 | -2.69848036 | -1.21642143 |
| C | -4.05618362 | -0.77996524 | 0.22265161  |
| C | -4.05611060 | 0.78021915  | 0.22263417  |
| H | -4.47646450 | 1.13894918  | -0.72727192 |
| H | -4.66609267 | 1.19593695  | 1.04527147  |
| H | -4.47660345 | -1.13867432 | -0.72723326 |
| H | -4.66617792 | -1.19561285 | 1.04531434  |
| C | -2.14623336 | -1.28702096 | 1.71883154  |
| C | -2.14619178 | 1.28711139  | 1.71887905  |
| H | -1.05529049 | 1.43300260  | 1.68976723  |
| H | -2.59271051 | 2.14973043  | 2.25061386  |
| H | -2.59271794 | -2.14965282 | 2.25057299  |
| H | -1.05533106 | -1.43290490 | 1.68965458  |
| C | -2.50426562 | 0.00003643  | 2.45991899  |
| P | 2.46213540  | -1.37357787 | -0.05777326 |
| P | 2.46231556  | 1.37338149  | -0.05809604 |
| H | -3.08552821 | 2.69867637  | -1.21638721 |
| H | -2.83895200 | 3.43516655  | 0.39834276  |
| C | 2.16257043  | 1.23249941  | 1.79581108  |
| C | 2.16254625  | -1.23206430 | 1.79612475  |
| N | 1.42933965  | 0.00026460  | 2.11792937  |
| H | 1.53131252  | 2.09121917  | 2.08370660  |
| H | 3.12889485  | 1.31861097  | 2.34884662  |
| H | 1.53132162  | -2.09069498 | 2.08435581  |
| H | 3.12892095  | -1.31799596 | 2.34909935  |
| C | 1.02613280  | 0.00044140  | 3.52732708  |
| H | 0.41923348  | -0.89475131 | 3.74086496  |
| H | 0.41928981  | 0.89572000  | 3.74066229  |
| H | 1.89914118  | 0.00049529  | 4.22052650  |
| C | 4.22482068  | 0.77139238  | -0.24460486 |
| C | 4.22471451  | -0.77190006 | -0.24452976 |
| C | 2.64549854  | 3.19227285  | -0.30556630 |
| H | 2.91315210  | 3.37869984  | -1.35789132 |
| H | 3.44235629  | 3.58635456  | 0.34798087  |
| H | 1.70181068  | 3.71089470  | -0.08104306 |
| C | 2.64507067  | -3.19258376 | -0.30463300 |
| H | 1.70136686  | -3.71102433 | -0.07975300 |
| H | 3.44199437  | -3.58651133 | 0.34892694  |
| H | 2.91252881  | -3.37942938 | -1.35693386 |
| H | -1.95948875 | 0.00000755  | 3.41783617  |
| H | -3.57570436 | 0.00004748  | 2.71959687  |
| H | 4.59967166  | -1.17766403 | -1.19850583 |
| H | 4.83981267  | -1.19360436 | 0.56870264  |
| H | 4.83990061  | 1.19309088  | 0.56864458  |
| H | 4.59993980  | 1.17700827  | -1.19858077 |
| H | 1.98224059  | -0.00026433 | -2.23312180 |

**Name-NiFeNCS:**G= -3055.581961//H= -3055.487049//SPE=-3056.0350702

Angstroms

Atom X Y Z

|    |             |             |             |
|----|-------------|-------------|-------------|
| S  | 0.28070533  | -1.65235409 | -1.54127115 |
| Ni | 1.71802053  | -1.04199453 | -0.00849915 |
| Fe | -0.97283269 | -0.34861281 | -0.00128485 |
| S  | 0.28094300  | -1.68303214 | 1.51211908  |
| C  | 1.15406581  | -0.72297371 | -2.90489782 |
| C  | 2.65050260  | -0.87612977 | -2.66707488 |
| H  | 0.84417132  | 0.33191271  | -2.90492484 |
| H  | 0.87103847  | -1.17042838 | -3.87101081 |
| C  | 1.15321282  | -0.77812173 | 2.89267826  |
| C  | 2.65011723  | -0.92310105 | 2.65301977  |
| H  | 0.87123265  | -1.24382866 | 3.85047401  |
| H  | 0.84005481  | 0.27556967  | 2.91190172  |
| N  | 3.01109972  | -0.37224917 | -1.30073937 |
| N  | 3.01082444  | -0.39485108 | 1.29568953  |
| H  | 3.23447236  | -0.32859144 | -3.43220230 |
| H  | 2.93027717  | -1.94031708 | -2.71018498 |
| C  | 4.30840563  | -0.92307560 | -0.78598511 |
| C  | 4.30833691  | -0.93649168 | 0.77161695  |
| H  | 4.38532694  | -1.97481332 | 1.12262538  |
| H  | 5.15546698  | -0.36757794 | 1.19517632  |
| H  | 4.38523066  | -1.95527123 | -1.15478119 |
| H  | 5.15580387  | -0.34722020 | -1.19954612 |
| C  | 3.00135028  | 1.13107626  | -1.27165471 |
| C  | 3.00290638  | 1.10863666  | 1.29356015  |
| H  | 1.96120249  | 1.44031912  | 1.42308235  |
| H  | 3.58914148  | 1.45492911  | 2.16604991  |
| H  | 3.58494565  | 1.49422802  | -2.13900261 |
| H  | 1.95847121  | 1.46254244  | -1.39203244 |
| C  | 3.60025016  | 1.69349965  | 0.01553948  |
| P  | -1.89887209 | 1.08145149  | -1.38369540 |
| P  | -1.89186223 | 1.06575924  | 1.40275828  |
| H  | 2.93249866  | -1.98719493 | 2.67840268  |
| H  | 3.23219654  | -0.38754463 | 3.42799790  |
| C  | -0.94781188 | 2.67684872  | 1.24758855  |
| C  | -0.95311254 | 2.68997087  | -1.21938758 |
| N  | -0.15032528 | 2.70878726  | 0.01248949  |
| H  | -0.25347499 | 2.71797994  | 2.10442516  |
| H  | -1.65201770 | 3.53759178  | 1.33490892  |
| H  | -0.26230416 | 2.73770193  | -2.07878625 |
| H  | -1.65634173 | 3.55253461  | -1.29544400 |
| C  | 0.73053391  | 3.88319261  | 0.01654220  |
| H  | 1.37150851  | 3.86987464  | -0.87976684 |
| H  | 1.37412415  | 3.86206267  | 0.91077937  |
| H  | 0.15822459  | 4.83879981  | 0.02162483  |
| C  | -3.60311660 | 1.47556400  | 0.78767720  |
| C  | -3.60677035 | 1.48488268  | -0.75533307 |
| C  | -2.13433686 | 0.85365378  | 3.21177391  |
| H  | -2.69686248 | -0.07811635 | 3.38080357  |
| H  | -2.70726192 | 1.70614800  | 3.61361977  |
| H  | -1.16517496 | 0.78944725  | 3.72698859  |
| C  | -2.15052382 | 0.88288710  | -3.19278292 |
| H  | -1.18383108 | 0.82361818  | -3.71313210 |

|   |             |             |             |
|---|-------------|-------------|-------------|
| H | -2.72635358 | 1.73755208  | -3.58574186 |
| H | -2.71280330 | -0.04829456 | -3.36586943 |
| H | 3.42343795  | 2.78069234  | 0.02515414  |
| H | 4.69487119  | 1.56237783  | 0.01371396  |
| H | -4.28324459 | 0.71406296  | -1.15985318 |
| H | -3.91142132 | 2.45961660  | -1.17133454 |
| H | -3.90621268 | 2.44509511  | 1.21683473  |
| H | -4.27725664 | 0.69953402  | 1.18608193  |
| C | -3.55025465 | -1.96966427 | -0.01187019 |
| N | -2.49366870 | -1.40962237 | -0.00754706 |
| S | -4.98896636 | -2.76847332 | -0.01815429 |

**Name-NiFeOH:**G= -2640.537383//H= -2640.446956//SPE =-2640.9943366

Angstroms

| Atom | X           | Y           | Z           |
|------|-------------|-------------|-------------|
| S    | -0.48050393 | -1.53266822 | -1.78849068 |
| Ni   | -1.64545758 | -0.00012368 | -0.75887652 |
| Fe   | 1.14794336  | -0.00021761 | -0.95764982 |
| S    | -0.48070674 | 1.53219665  | -1.78916387 |
| C    | -1.03277808 | -2.89267430 | -0.63960282 |
| C    | -2.51252613 | -2.66611430 | -0.35542291 |
| H    | -0.43313635 | -2.87644305 | 0.28214243  |
| H    | -0.88081162 | -3.86344058 | -1.13845810 |
| C    | -1.03303308 | 2.89246428  | -0.64062705 |
| C    | -2.51276124 | 2.66590285  | -0.35631763 |
| H    | -0.88114585 | 3.86311682  | -1.13972869 |
| H    | -0.43338322 | 2.87650618  | 0.28112086  |
| N    | -2.72095225 | -1.30270219 | 0.23323222  |
| N    | -2.72108204 | 1.30267784  | 0.23281188  |
| H    | -2.91001825 | -3.43544129 | 0.33474416  |
| H    | -3.08392308 | -2.71307340 | -1.29569317 |
| C    | -4.11443220 | -0.77928594 | 0.05280786  |
| C    | -4.11450141 | 0.77904749  | 0.05249456  |
| H    | -4.46857930 | 1.13644299  | -0.92448376 |
| H    | -4.77979431 | 1.19497241  | 0.83072228  |
| H    | -4.46854149 | -1.13710477 | -0.92400401 |
| H    | -4.77963338 | -1.19497641 | 0.83123654  |
| C    | -2.31895690 | -1.28694275 | 1.68039462  |
| C    | -2.31916635 | 1.28746508  | 1.67999910  |
| H    | -1.22871881 | 1.42867893  | 1.72852874  |
| H    | -2.80143729 | 2.15016107  | 2.17898005  |
| H    | -2.80102392 | -2.14957690 | 2.17967739  |
| H    | -1.22847733 | -1.42789908 | 1.72891894  |
| C    | -2.73447406 | 0.00033555  | 2.39099997  |
| P    | 2.39150216  | -1.38595489 | 0.18309500  |
| P    | 2.39160219  | 1.38624461  | 0.18233051  |
| H    | -3.08420263 | 2.71251289  | -1.29657910 |

|   |             |             |             |
|---|-------------|-------------|-------------|
| H | -2.91027444 | 3.43543470  | 0.33360690  |
| C | 1.90837353  | 1.23183860  | 1.98926700  |
| C | 1.90793611  | -1.23111336 | 1.98984051  |
| N | 1.14749892  | 0.00055385  | 2.23832548  |
| H | 1.25645629  | 2.09141498  | 2.22148354  |
| H | 2.82105358  | 1.31373796  | 2.62627184  |
| H | 1.25561016  | -2.09036788 | 2.22210087  |
| H | 2.82041537  | -1.31318871 | 2.62711170  |
| C | 0.62847376  | 0.00095648  | 3.61089782  |
| H | 0.00684414  | -0.89446739 | 3.77305679  |
| H | 0.00697997  | 0.89655976  | 3.77259403  |
| H | 1.44337284  | 0.00108193  | 4.37076599  |
| C | 4.15766339  | 0.77251282  | 0.16050755  |
| C | 4.15759895  | -0.77213026 | 0.16135507  |
| C | 2.59376700  | 3.20161183  | -0.05056422 |
| H | 2.95388161  | 3.38522647  | -1.07530124 |
| H | 3.33010841  | 3.59337428  | 0.67143993  |
| H | 1.63346482  | 3.71888541  | 0.08990388  |
| C | 2.59398842  | -3.20129582 | -0.04965455 |
| H | 1.63394320  | -3.71885009 | 0.09155989  |
| H | 3.33096955  | -3.59277026 | 0.67185228  |
| H | 2.95341688  | -3.38488827 | -1.07463743 |
| H | -2.26912181 | 0.00052073  | 3.38944296  |
| H | -3.82332334 | 0.00027713  | 2.56473990  |
| H | 4.63093137  | -1.17776063 | -0.74846886 |
| H | 4.68869544  | -1.19289211 | 1.03160423  |
| H | 4.68920737  | 1.19421738  | 1.03003174  |
| H | 4.63060208  | 1.17711888  | -0.74998206 |
| O | 2.29150944  | -0.00165939 | -2.53492858 |
| H | 3.23732550  | -0.00068074 | -2.29718109 |

**Name-NiFeP:**G= -3230.590754//H= -3230.492807//SPE =-3231.0245879  
 Angstroms

| Atom | X           | Y           | Z           |
|------|-------------|-------------|-------------|
| S    | -0.17607794 | -1.60822901 | -1.76421484 |
| Ni   | -1.44598481 | -0.00007593 | -0.95022005 |
| Fe   | 1.31241369  | -0.00010990 | -0.77565265 |
| S    | -0.17599620 | 1.60789080  | -1.76446720 |
| C    | -0.73701096 | -3.03678443 | -0.67978577 |
| C    | -2.26707322 | -3.05476812 | -0.54292280 |
| H    | -0.26599049 | -2.93849438 | 0.31001634  |
| H    | -0.37967232 | -3.96824470 | -1.14809894 |
| C    | -0.73683997 | 3.03659234  | -0.68018502 |
| C    | -2.26690786 | 3.05471851  | -0.54337340 |
| H    | -0.37940995 | 3.96798492  | -1.14856345 |
| H    | -0.26585795 | 2.93833957  | 0.30964154  |
| H    | -2.60171487 | -3.84031100 | 0.15715098  |
| H    | -2.75898404 | -3.20877384 | -1.51826424 |
| C    | -4.48123233 | -0.78291131 | -0.25895666 |
| C    | -4.48121829 | 0.78296334  | -0.25916001 |

|   |             |             |             |
|---|-------------|-------------|-------------|
| H | -4.78088366 | 1.17117410  | -1.24524944 |
| H | -5.16604762 | 1.19415458  | 0.50026681  |
| H | -4.78096089 | -1.17137386 | -1.24492788 |
| H | -5.16603324 | -1.19389015 | 0.50061092  |
| C | -2.51288140 | -1.31446298 | 1.88823227  |
| C | -2.51297561 | 1.31484742  | 1.88800340  |
| H | -1.43461594 | 1.46292257  | 2.06745506  |
| H | -3.05028865 | 2.17322098  | 2.32766936  |
| H | -3.05007222 | -2.17281189 | 2.32809444  |
| H | -1.43449033 | -1.46238464 | 2.06763160  |
| C | -3.02546172 | 0.00022764  | 2.51351464  |
| P | 2.54776914  | -1.39021208 | 0.37889577  |
| P | 2.54793726  | 1.39023681  | 0.37843692  |
| C | 2.46425289  | -0.00028963 | -2.15405525 |
| N | 3.20597289  | -0.00079881 | -3.10199365 |
| H | -2.75877012 | 3.20865870  | -1.51874946 |
| H | -2.60150398 | 3.84036825  | 0.15660199  |
| C | 1.97883753  | 1.23323048  | 2.16026326  |
| C | 1.97840637  | -1.23262987 | 2.16058409  |
| N | 1.20228129  | 0.00046064  | 2.36572403  |
| H | 1.31601889  | 2.09240700  | 2.35859246  |
| H | 2.85771057  | 1.31227002  | 2.84246141  |
| H | 1.31522070  | -2.09151919 | 2.35893184  |
| H | 2.85713226  | -1.31189528 | 2.84294980  |
| C | 0.60748684  | 0.00072492  | 3.70823621  |
| H | -0.02200779 | -0.89446829 | 3.83599027  |
| H | -0.02175413 | 0.89612998  | 3.83575688  |
| H | 1.37974450  | 0.00071774  | 4.51073522  |
| C | 4.30517974  | 0.77148913  | 0.41642571  |
| C | 4.30507547  | -0.77160534 | 0.41690601  |
| C | 2.76138012  | 3.19806037  | 0.12742471  |
| H | 3.11617671  | 3.36719940  | -0.90164839 |
| H | 3.50963349  | 3.58327241  | 0.84031635  |
| H | 1.81048552  | 3.72924056  | 0.27386233  |
| C | 2.76114675  | -3.19814933 | 0.12861923  |
| H | 1.81019153  | -3.72921957 | 0.27504948  |
| H | 3.50921382  | -3.58312237 | 0.84183644  |
| H | 3.11617688  | -3.36772628 | -0.90030066 |
| H | -2.74338488 | 0.00033229  | 3.58075202  |
| H | -4.12937777 | 0.00018554  | 2.48706209  |
| H | 4.80256951  | -1.17343245 | -0.48058777 |
| H | 4.80681492  | -1.19356924 | 1.30352910  |
| H | 4.80719269  | 1.19394673  | 1.30265894  |
| H | 4.80248731  | 1.17268911  | -0.48145000 |
| P | -2.73871803 | -1.37003279 | 0.05544386  |
| P | -2.73870228 | 1.37009244  | 0.05519168  |

**Name-NiFePy:**G= -2774.065563//H= -2773.970004//SPE =-2774.5780348  
 Angstroms



| Atom | X           | Y           | Z           |
|------|-------------|-------------|-------------|
| S    | -0.29231574 | -1.57220452 | 1.56301979  |
| Ni   | -1.73486109 | -0.99895376 | 0.02324142  |
| Fe   | 0.98700829  | -0.31811778 | 0.00834488  |
| S    | -0.28869654 | -1.65253124 | -1.47893729 |
| C    | -1.17198382 | -0.62211163 | 2.90835650  |
| C    | -2.66827925 | -0.79701828 | 2.67812043  |
| H    | -0.87360029 | 0.43625240  | 2.88374192  |
| H    | -0.88247104 | -1.04357301 | 3.88439657  |
| C    | -1.15923940 | -0.77016273 | -2.87468382 |
| C    | -2.65765916 | -0.92403570 | -2.64362097 |
| H    | -0.86890695 | -1.24329036 | -3.82659997 |
| H    | -0.85172174 | 0.28537408  | -2.90311977 |
| N    | -3.03791600 | -0.32282393 | 1.30415110  |
| N    | -3.03250566 | -0.38448663 | -1.29465875 |
| H    | -3.25735711 | -0.24394406 | 3.43564866  |
| H    | -2.93377286 | -1.86401379 | 2.74060546  |
| C    | -4.32484283 | -0.90101958 | 0.79492533  |
| C    | -4.32151988 | -0.93823156 | -0.76374616 |
| H    | -4.38191328 | -1.98306844 | -1.09860030 |
| H    | -5.17818376 | -0.38990083 | -1.19583816 |
| H    | -4.38692813 | -1.92874685 | 1.17902842  |
| H    | -5.18344132 | -0.33288554 | 1.19658491  |
| C    | -3.04991842 | 1.17913631  | 1.25082605  |
| C    | -3.05003009 | 1.11777533  | -1.31531529 |
| H    | -2.01472065 | 1.46484448  | -1.45420276 |
| H    | -3.64419170 | 1.44130549  | -2.19152220 |
| H    | -3.63961315 | 1.54907650  | 2.11144661  |
| H    | -2.01182345 | 1.52631886  | 1.36735539  |
| C    | -3.65500411 | 1.71341118  | -0.04557860 |
| P    | 1.89829182  | 1.14371742  | 1.36487761  |
| P    | 1.89467106  | 1.08479973  | -1.41289470 |
| H    | -2.92983437 | -1.99111293 | -2.65942673 |
| H    | -3.23926643 | -0.40328448 | -3.42925017 |
| C    | 0.92040991  | 2.68411022  | -1.28098266 |
| C    | 0.91482875  | 2.73085336  | 1.17767873  |
| N    | 0.11390563  | 2.72340166  | -0.05364101 |
| H    | 0.23285245  | 2.70556348  | -2.14396217 |
| H    | 1.61238835  | 3.55477904  | -1.37448214 |
| H    | 0.22265348  | 2.77525810  | 2.03633655  |
| H    | 1.60079542  | 3.60863290  | 1.24482589  |
| C    | -0.78186148 | 3.88554528  | -0.07723689 |
| H    | -1.42596530 | 3.87696441  | 0.81702643  |
| H    | -1.42246018 | 3.84419736  | -0.97311375 |
| H    | -0.22197595 | 4.84867537  | -0.09374486 |
| C    | 3.59797810  | 1.55148361  | -0.80766407 |
| C    | 3.59728914  | 1.59429889  | 0.73494552  |
| C    | 2.14067584  | 0.92941579  | -3.23256422 |
| H    | 2.81048399  | 0.08051807  | -3.43870879 |
| H    | 2.60032551  | 1.85417181  | -3.62096912 |
| H    | 1.17839147  | 0.76194521  | -3.73797078 |
| C    | 2.15066432  | 1.06025107  | 3.18842180  |

|   |             |             |             |
|---|-------------|-------------|-------------|
| H | 1.19049343  | 0.90543014  | 3.70171144  |
| H | 2.60466515  | 2.00244795  | 3.53983079  |
| H | 2.82667808  | 0.22430787  | 3.42489006  |
| H | -3.49356595 | 2.80282581  | -0.07155356 |
| H | -4.74776921 | 1.56739402  | -0.04209631 |
| H | 4.29609087  | 0.85453849  | 1.15820311  |
| H | 3.86874452  | 2.58781990  | 1.13018420  |
| H | 3.88177149  | 2.51823599  | -1.25701768 |
| H | 4.28784090  | 0.78067444  | -1.18808424 |
| N | 2.52804437  | -1.49660699 | 0.03108663  |
| C | 3.18822272  | -1.96018196 | 1.14891964  |
| C | 3.17490321  | -2.01468505 | -1.07056304 |
| C | 4.26021540  | -2.78446521 | 0.76639312  |
| H | 2.84899970  | -1.68921972 | 2.14830619  |
| C | 4.25109259  | -2.82023325 | -0.66106752 |
| H | 2.82463345  | -1.79062192 | -2.07776540 |
| H | 4.94898506  | -3.29850352 | 1.44004924  |
| H | 4.93199009  | -3.36680957 | -1.31688202 |

**Name-NiFeSCH3:**G= -3002.637686//H= -3002.544232//SPE=-3003.119091

Angstroms

| Atom | X           | Y           | Z           |
|------|-------------|-------------|-------------|
| S    | -0.29131493 | -2.11642731 | -0.72872658 |
| Ni   | -1.69304094 | -0.44348282 | -0.71826074 |
| Fe   | 1.08014084  | -0.21486642 | -0.58038220 |
| S    | -0.44638295 | 0.55379887  | -2.21129972 |
| C    | -0.94696514 | -2.83097775 | 0.86781652  |
| C    | -2.46222122 | -2.67605749 | 0.83696876  |
| H    | -0.50111021 | -2.30938525 | 1.72793400  |
| H    | -0.66890890 | -3.89596101 | 0.92065029  |
| C    | -1.24826393 | 2.21817240  | -1.93912517 |
| C    | -2.74016287 | 1.97251426  | -1.75068705 |
| H    | -1.07310899 | 2.84508694  | -2.82836585 |
| H    | -0.79947698 | 2.71771974  | -1.06767397 |
| N    | -2.82659876 | -1.23225465 | 0.66184137  |
| N    | -2.96480649 | 1.03773053  | -0.60025099 |
| H    | -2.92611092 | -3.06973089 | 1.76246167  |
| H    | -2.87600889 | -3.22855580 | -0.02117186 |
| C    | -4.20553180 | -1.02650286 | 0.10916106  |
| C    | -4.28839512 | 0.33308392  | -0.64840990 |
| H    | -4.51026616 | 0.14313608  | -1.70787353 |
| H    | -5.08293146 | 0.98641900  | -0.24399312 |
| H    | -4.39069883 | -1.84476332 | -0.60089027 |
| H    | -4.95610534 | -1.09891428 | 0.91750465  |
| C    | -2.63071431 | -0.48113460 | 1.94844424  |
| C    | -2.77792810 | 1.75914761  | 0.70400242  |
| H    | -1.71383213 | 2.02816808  | 0.79091430  |
| H    | -3.36956426 | 2.69427625  | 0.66767485  |
| H    | -3.11402834 | -1.05709387 | 2.76101456  |
| H    | -1.54905178 | -0.43710150 | 2.14895005  |

|   |             |             |             |
|---|-------------|-------------|-------------|
| C | -3.22589505 | 0.92467835  | 1.90184406  |
| P | 2.23730314  | -0.74898665 | 1.18672478  |
| P | 2.09766123  | 1.65990590  | -0.14963174 |
| H | -3.15565416 | 1.49323122  | -2.65122648 |
| H | -3.28541558 | 2.92060605  | -1.57478117 |
| C | 1.32237314  | 2.34292004  | 1.42047146  |
| C | 1.47681490  | 0.19597225  | 2.62691211  |
| N | 0.61360185  | 1.29412599  | 2.16932011  |
| H | 0.58207460  | 3.10127150  | 1.11187690  |
| H | 2.10339050  | 2.85708001  | 2.03025399  |
| H | 0.84745813  | -0.52325085 | 3.17902275  |
| H | 2.28474381  | 0.53974430  | 3.31634353  |
| C | -0.09100231 | 1.88369697  | 3.31259185  |
| H | -0.67551329 | 1.10605229  | 3.83085013  |
| H | -0.78113851 | 2.66802327  | 2.96126822  |
| H | 0.60835887  | 2.34195440  | 4.04947428  |
| C | 3.86827975  | 1.34412184  | 0.36269388  |
| C | 3.95275835  | -0.01829198 | 1.08085479  |
| C | 2.25109170  | 3.15314220  | -1.21789995 |
| H | 2.78007747  | 2.87152421  | -2.14231192 |
| H | 2.82597073  | 3.93537789  | -0.69391914 |
| H | 1.25722494  | 3.54449929  | -1.47952870 |
| C | 2.54818820  | -2.40288448 | 1.94254296  |
| H | 1.59927802  | -2.92093856 | 2.14399801  |
| H | 3.10341067  | -2.28020244 | 2.88801787  |
| H | 3.14664914  | -3.01128055 | 1.24781905  |
| H | -2.92009652 | 1.45331775  | 2.81865168  |
| H | -4.32649893 | 0.87139252  | 1.93508850  |
| H | 4.57289070  | -0.73254412 | 0.51612429  |
| H | 4.37053502  | 0.06642035  | 2.09841350  |
| H | 4.20516273  | 2.17885352  | 1.00047599  |
| H | 4.47019062  | 1.34863292  | -0.55947160 |
| S | 2.60006729  | -0.83650395 | -2.15267946 |
| C | 3.26767084  | -2.48637048 | -1.70190745 |
| H | 3.82097321  | -2.87943585 | -2.57328193 |
| H | 3.96695742  | -2.43730695 | -0.85041159 |
| H | 2.45332376  | -3.18854150 | -1.45576823 |

**Name-NiFeSCN:**G= -3055.574144//H= -3055.479762//SPE=-3056.0272406

Angstroms

| Atom | X           | Y           | Z           |
|------|-------------|-------------|-------------|
| S    | 0.21846158  | 2.16387270  | -0.45934270 |
| Ni   | 1.71318083  | 0.58287924  | -0.66901793 |
| Fe   | -1.02876169 | 0.17255053  | -0.51624261 |
| S    | 0.48649648  | -0.28915615 | -2.25322515 |
| C    | 0.86656547  | 2.71960582  | 1.20005750  |
| C    | 2.38615219  | 2.65940078  | 1.12397677  |
| H    | 0.47172075  | 2.07435036  | 1.99794086  |
| H    | 0.52776678  | 3.75185751  | 1.38263868  |
| C    | 1.37010555  | -1.93312478 | -2.18503501 |

|   |             |             |             |
|---|-------------|-------------|-------------|
| C | 2.85099395  | -1.63074704 | -1.99434170 |
| H | 1.20415580  | -2.46200174 | -3.13711943 |
| H | 0.96593941  | -2.54806357 | -1.36728691 |
| N | 2.82511578  | 1.26660727  | 0.77649740  |
| N | 3.05636271  | -0.82740219 | -0.74395559 |
| H | 2.84848801  | 2.96739268  | 2.08170585  |
| H | 2.75044592  | 3.32976045  | 0.32977722  |
| C | 4.20242298  | 1.20393947  | 0.18268027  |
| C | 4.33955598  | -0.04946137 | -0.73303768 |
| H | 4.52527533  | 0.27809222  | -1.76561570 |
| H | 5.17613848  | -0.70189855 | -0.42423198 |
| H | 4.32924238  | 2.11038823  | -0.42550416 |
| H | 4.96231520  | 1.22080434  | 0.98463276  |
| C | 2.69690112  | 0.36353857  | 1.97148433  |
| C | 2.93627909  | -1.70538456 | 0.46967172  |
| H | 1.89025333  | -2.04047081 | 0.53627494  |
| H | 3.57752149  | -2.59379296 | 0.31366066  |
| H | 3.17078950  | 0.86819381  | 2.83488221  |
| H | 1.62386156  | 0.24217027  | 2.18764945  |
| C | 3.36302450  | -0.99213431 | 1.75151946  |
| P | -2.18536833 | 0.41239000  | 1.33534053  |
| P | -1.96055055 | -1.80610952 | -0.32498312 |
| H | 3.22291411  | -1.02986621 | -2.83890991 |
| H | 3.44471424  | -2.56383200 | -1.94095579 |
| C | -1.14323451 | -2.63794600 | 1.14443954  |
| C | -1.35238845 | -0.67414142 | 2.61881352  |
| N | -0.45610543 | -1.65911103 | 1.99872670  |
| H | -0.38565326 | -3.33019935 | 0.73844429  |
| H | -1.89867465 | -3.24401722 | 1.69840673  |
| H | -0.74101843 | -0.00413254 | 3.24741237  |
| H | -2.12874371 | -1.14146741 | 3.26995273  |
| C | 0.31558127  | -2.35431458 | 3.03572088  |
| H | 0.87757940  | -1.61930881 | 3.63421321  |
| H | 1.03097636  | -3.04822455 | 2.56561767  |
| H | -0.33702895 | -2.93899695 | 3.72355541  |
| C | -3.73641654 | -1.61475384 | 0.21438724  |
| C | -3.86590057 | -0.37124445 | 1.11830479  |
| C | -2.05673641 | -3.13602579 | -1.59122762 |
| H | -2.60097849 | -2.74600336 | -2.46609348 |
| H | -2.59995197 | -4.00438939 | -1.18190252 |
| H | -1.05009009 | -3.44724688 | -1.90508482 |
| C | -2.56805506 | 1.94672354  | 2.27653507  |
| H | -1.64497710 | 2.41887563  | 2.64243831  |
| H | -3.21559234 | 1.69862883  | 3.13441288  |
| H | -3.09465667 | 2.64801954  | 1.61069736  |
| H | 3.10364516  | -1.64019404 | 2.60356129  |
| H | 4.45960182  | -0.88206299 | 1.77482542  |
| H | -4.51631379 | 0.39356993  | 0.66304338  |
| H | -4.27233980 | -0.61320763 | 2.11472758  |
| H | -4.04841570 | -2.54129581 | 0.72510652  |
| H | -4.34008034 | -1.51038636 | -0.70130518 |
| C | -3.35651623 | 2.24568558  | -1.32009243 |

|   |             |            |             |
|---|-------------|------------|-------------|
| N | -3.92146470 | 3.19738343 | -0.86733982 |
| S | -2.60112497 | 0.91701968 | -2.00572965 |

**Name-TSF:**G=-2854.101351//H=-2853.974252//SPE=-2854.61094959

Angstroms

| Atom | X           | Y           | Z           |
|------|-------------|-------------|-------------|
| S    | 0.53989504  | 1.95773366  | -0.36693690 |
| Ni   | 1.98143596  | 0.32182212  | -0.45199775 |
| S    | 0.66962710  | -0.73117137 | -1.84886218 |
| C    | 1.23003809  | 2.57329917  | 1.24701900  |
| C    | 2.74583593  | 2.58784136  | 1.06819291  |
| H    | 0.90599504  | 1.92376371  | 2.07515261  |
| H    | 0.85175135  | 3.59239914  | 1.43239236  |
| C    | 1.55365565  | -2.34855693 | -1.58444356 |
| C    | 3.04441753  | -2.02531587 | -1.61823590 |
| H    | 1.29039752  | -3.02926413 | -2.41111425 |
| H    | 1.24263162  | -2.81428819 | -0.63830268 |
| N    | 3.23135259  | 1.19678982  | 0.77425753  |
| N    | 3.37822055  | -1.05162753 | -0.52453051 |
| H    | 3.26157422  | 2.98340797  | 1.96431293  |
| H    | 3.00959815  | 3.22554911  | 0.20934013  |
| C    | 4.50401280  | 1.13901763  | -0.01689686 |
| C    | 4.59062396  | -0.20951175 | -0.79871171 |
| H    | 4.59786763  | -0.00039880 | -1.87748411 |
| H    | 5.50981506  | -0.77225833 | -0.55167563 |
| H    | 4.47421741  | 1.97047337  | -0.73504398 |
| H    | 5.37551183  | 1.28901241  | 0.64676404  |
| C    | 3.35485774  | 0.43510155  | 2.06170495  |
| C    | 3.52096292  | -1.78851602 | 0.77440214  |
| H    | 2.53983664  | -2.21329623 | 1.02501629  |
| H    | 4.21985501  | -2.63186201 | 0.61336937  |
| H    | 3.93360725  | 1.05694928  | 2.77156291  |
| H    | 2.34138222  | 0.30745333  | 2.46493954  |
| C    | 4.05753021  | -0.90999899 | 1.90112305  |
| P    | -2.75736362 | 1.31649635  | 0.37521453  |
| P    | -2.64222093 | -1.26061625 | -0.61433767 |
| H    | 3.29945248  | -1.54898139 | -2.57840313 |
| H    | 3.66235986  | -2.93755437 | -1.50786883 |
| C    | -3.24316081 | -1.77302251 | 1.10862759  |
| C    | -3.34766438 | 0.57910733  | 2.01042781  |
| N    | -2.76416676 | -0.79535592 | 2.14659026  |
| H    | -2.80209664 | -2.74924133 | 1.36079975  |
| H    | -4.34091662 | -1.83631487 | 1.16286175  |
| H    | -2.95698072 | 1.18283902  | 2.84357243  |
| H    | -4.44446841 | 0.51181400  | 2.07416265  |
| C    | -2.88301130 | -1.33553168 | 3.53556483  |
| H    | -2.43895188 | -0.61040316 | 4.23113291  |
| H    | -2.34542254 | -2.29277515 | 3.58811449  |
| H    | -3.94720112 | -1.48480165 | 3.76582698  |
| C    | -4.18435289 | -0.43948422 | -1.27408994 |

|    |             |             |             |
|----|-------------|-------------|-------------|
| C  | -4.26042206 | 0.99763056  | -0.69866828 |
| C  | -2.53285312 | -2.88931824 | -1.45386233 |
| H  | -2.32521634 | -2.71292297 | -2.52109309 |
| H  | -3.47201951 | -3.45736182 | -1.34757144 |
| H  | -1.69806686 | -3.45932192 | -1.01588524 |
| C  | -2.79664833 | 3.11691846  | 0.72658758  |
| H  | -2.02254622 | 3.35888097  | 1.47141329  |
| H  | -3.78791834 | 3.41944600  | 1.10238702  |
| H  | -2.57611764 | 3.65357067  | -0.20968826 |
| H  | 3.94653583  | -1.46392568 | 2.84799510  |
| H  | 5.14020421  | -0.75121139 | 1.76424551  |
| H  | -4.24142617 | 1.74937468  | -1.50276446 |
| H  | -5.17029044 | 1.15893058  | -0.09757498 |
| H  | -5.06663217 | -1.04510665 | -1.00921224 |
| H  | -4.09369999 | -0.42394871 | -2.37178755 |
| O  | 0.51607773  | -0.98930943 | 2.97302085  |
| C  | 0.22394206  | -1.69667854 | 2.04736904  |
| H  | -0.51144807 | -0.48028673 | 0.91461632  |
| Fe | -1.07859512 | 0.23700229  | -0.47269480 |
| O  | 0.09192721  | -2.72930347 | 1.45168302  |
| H  | -1.74624227 | -0.64291570 | 1.88492755  |
| F  | -1.56911013 | 1.03330505  | -2.15965551 |

**Name-TSH:**G= -2754.902352//H= -2754.807321//SPE =-2755.3806762

Angstroms

| Atom | X          | Y           | Z           |
|------|------------|-------------|-------------|
| S    | 0.50084767 | 1.91280834  | -1.04352027 |
| Ni   | 1.89823397 | 0.26796637  | -0.70336623 |
| S    | 0.60356484 | -1.04256724 | -1.88545570 |
| C    | 1.16765576 | 2.89014229  | 0.39806092  |
| C    | 2.68645639 | 2.79225168  | 0.32972165  |
| H    | 0.75683632 | 2.48911145  | 1.33822118  |
| H    | 0.84499288 | 3.94004074  | 0.29754936  |
| C    | 1.45368833 | -2.58580774 | -1.25986923 |
| C    | 2.95104609 | -2.30055341 | -1.25543233 |
| H    | 1.22500950 | -3.41483138 | -1.95022880 |
| H    | 1.07004734 | -2.85179718 | -0.26304798 |
| N    | 3.10002266 | 1.35141556  | 0.39951388  |
| N    | 3.23638935 | -1.12472413 | -0.36736172 |
| H    | 3.17654191 | 3.36115057  | 1.14406146  |
| H    | 3.03667921 | 3.19530661  | -0.63393658 |
| C    | 4.44159743 | 1.07135157  | -0.20699706 |
| C    | 4.51502331 | -0.41062145 | -0.68841350 |
| H    | 4.62839359 | -0.42933626 | -1.78136337 |
| H    | 5.37362975 | -0.94754148 | -0.24356808 |
| H    | 4.54875960 | 1.73653329  | -1.07509659 |
| H    | 5.24603773 | 1.31509190  | 0.51134789  |
| C    | 3.03369082 | 0.88313133  | 1.82475763  |
| C    | 3.21637894 | -1.56852221 | 1.06450441  |
| H    | 2.19382799 | -1.89933208 | 1.28843849  |
| H    | 3.88283315 | -2.44769469 | 1.16162152  |

|    |             |             |             |
|----|-------------|-------------|-------------|
| H  | 3.55862229  | 1.62644043  | 2.45594058  |
| H  | 1.97399443  | 0.87214116  | 2.11691070  |
| C  | 3.67826323  | -0.48413375 | 2.03478094  |
| P  | -2.74307226 | 1.45353017  | -0.32709799 |
| P  | -2.62961680 | -1.26287366 | -0.68250153 |
| H  | 3.28010182  | -2.03826932 | -2.27366249 |
| H  | 3.53812733  | -3.17591985 | -0.91381701 |
| C  | -3.43638252 | -1.37601056 | 1.03692787  |
| C  | -3.54669413 | 1.11360590  | 1.35682358  |
| N  | -3.00516492 | -0.19232922 | 1.85890516  |
| H  | -3.06613403 | -2.27861717 | 1.54630083  |
| H  | -4.53680606 | -1.39814714 | 0.99432614  |
| H  | -3.23341159 | 1.89361361  | 2.06767284  |
| H  | -4.64600597 | 1.05748297  | 1.31961050  |
| C  | -3.23898404 | -0.39123964 | 3.31929167  |
| H  | -2.82262400 | 0.46891578  | 3.86178534  |
| H  | -2.73732297 | -1.31696129 | 3.63603840  |
| H  | -4.32042911 | -0.46811453 | 3.50148198  |
| C  | -4.06759102 | -0.59640320 | -1.68234528 |
| C  | -4.13448585 | 0.93756667  | -1.47588004 |
| C  | -2.54812086 | -3.04800487 | -1.13417449 |
| H  | -2.22708002 | -3.13002894 | -2.18471790 |
| H  | -3.53066001 | -3.53387199 | -1.01131782 |
| H  | -1.80469333 | -3.54823736 | -0.49366936 |
| C  | -2.78879867 | 3.29462602  | -0.37430640 |
| H  | -2.09697640 | 3.69529997  | 0.38325411  |
| H  | -3.80868554 | 3.66688867  | -0.18099389 |
| H  | -2.45890021 | 3.62919447  | -1.37036320 |
| H  | 3.43815931  | -0.81844560 | 3.05780530  |
| H  | 4.77622929  | -0.38963446 | 1.99364680  |
| H  | -3.97575484 | 1.47742203  | -2.42359016 |
| H  | -5.10284234 | 1.26082619  | -1.05772932 |
| H  | -5.00241126 | -1.10056541 | -1.38377739 |
| H  | -3.86396852 | -0.85183926 | -2.73523277 |
| O  | 0.25674606  | -0.45380455 | 3.18405138  |
| C  | -0.01849366 | -1.31022695 | 2.39580064  |
| H  | -0.60187388 | -0.16111592 | 0.89678750  |
| Fe | -1.05791761 | 0.19031334  | -0.68082912 |
| O  | -0.20084683 | -2.39922271 | 1.93777086  |
| H  | -1.95091386 | -0.11697849 | 1.63099439  |
| H  | -1.43770751 | 0.51368198  | -2.13574788 |

**Name-TSNCS**:G=-3245.122175//H=-3245.012976//SPE=-3245.62387843

Angstroms

| Atom | X          | Y           | Z           |
|------|------------|-------------|-------------|
| S    | 0.48756414 | 2.05040756  | -0.56243361 |
| Ni   | 1.92910507 | 0.41449602  | -0.64749447 |
| S    | 0.61729620 | -0.63849748 | -2.04435889 |
| C    | 1.17770720 | 2.66597307  | 1.05152228  |
| C    | 2.69350503 | 2.68051525  | 0.87269619  |

|   |             |             |             |
|---|-------------|-------------|-------------|
| H | 0.85366414  | 2.01643761  | 1.87965589  |
| H | 0.79942045  | 3.68507303  | 1.23689564  |
| C | 1.50132475  | -2.25588303 | -1.77994028 |
| C | 2.99208664  | -1.93264197 | -1.81373262 |
| H | 1.23806662  | -2.93659024 | -2.60661097 |
| H | 1.19030072  | -2.72161430 | -0.83379940 |
| N | 3.17902169  | 1.28946372  | 0.57876081  |
| N | 3.32588966  | -0.95895363 | -0.72002723 |
| H | 3.20924332  | 3.07608187  | 1.76881621  |
| H | 2.95726725  | 3.31822300  | 0.01384342  |
| C | 4.45168190  | 1.23169153  | -0.21239358 |
| C | 4.53829306  | -0.11683785 | -0.99420843 |
| H | 4.54553673  | 0.09227509  | -2.07298083 |
| H | 5.45748416  | -0.67958444 | -0.74717235 |
| H | 4.42188651  | 2.06314727  | -0.93054069 |
| H | 5.32318093  | 1.38168630  | 0.45126732  |
| C | 3.30252684  | 0.52777544  | 1.86620823  |
| C | 3.46863202  | -1.69584213 | 0.57890542  |
| H | 2.48750575  | -2.12062233 | 0.82951957  |
| H | 4.16752411  | -2.53918812 | 0.41787265  |
| H | 3.88127635  | 1.14962317  | 2.57606619  |
| H | 2.28905132  | 0.40012722  | 2.26944283  |
| C | 4.00519932  | -0.81732510 | 1.70562633  |
| P | -2.80969451 | 1.40917025  | 0.17971781  |
| P | -2.69455183 | -1.16794236 | -0.80983439 |
| H | 3.24712158  | -1.45630750 | -2.77389985 |
| H | 3.61002896  | -2.84488047 | -1.70336555 |
| C | -3.29549171 | -1.68034861 | 0.91313087  |
| C | -3.39999528 | 0.67178122  | 1.81493109  |
| N | -2.81649765 | -0.70268203 | 1.95109354  |
| H | -2.85442754 | -2.65656743 | 1.16530303  |
| H | -4.39324751 | -1.74364098 | 0.96736503  |
| H | -3.00931161 | 1.27551292  | 2.64807571  |
| H | -4.49679931 | 0.60448790  | 1.87866593  |
| C | -2.93534220 | -1.24285779 | 3.34006811  |
| H | -2.49128278 | -0.51772926 | 4.03563619  |
| H | -2.39775344 | -2.20010125 | 3.39261777  |
| H | -3.99953202 | -1.39212775 | 3.57033026  |
| C | -4.23668379 | -0.34681032 | -1.46958665 |
| C | -4.31275296 | 1.09030445  | -0.89416500 |
| C | -2.58518402 | -2.79664435 | -1.64935905 |
| H | -2.37754724 | -2.62024907 | -2.71658980 |
| H | -3.52435041 | -3.36468793 | -1.54306815 |
| H | -1.75039776 | -3.36664802 | -1.21138196 |
| C | -2.84897923 | 3.20959236  | 0.53109086  |
| H | -2.07487712 | 3.45155486  | 1.27591657  |
| H | -3.84024924 | 3.51211989  | 0.90689030  |
| H | -2.62844853 | 3.74624456  | -0.40518498 |
| H | 3.89420493  | -1.37125178 | 2.65249838  |
| H | 5.08787331  | -0.65853749 | 1.56874879  |
| H | -4.29375706 | 1.84204858  | -1.69826118 |
| H | -5.22262133 | 1.25160448  | -0.29307170 |



|    |             |             |             |
|----|-------------|-------------|-------------|
| H  | -5.11896307 | -0.95243276 | -1.20470896 |
| H  | -4.14603089 | -0.33127482 | -2.56728427 |
| O  | 0.46374683  | -0.89663554 | 2.77752413  |
| C  | 0.17161116  | -1.60400464 | 1.85187232  |
| H  | -0.57060665 | -0.37897765 | 0.70241826  |
| Fe | -1.13092602 | 0.32967619  | -0.66819152 |
| O  | 0.03959631  | -2.63662958 | 1.25618630  |
| H  | -1.80198701 | -0.54592422 | 1.68108016  |
| N  | -1.60240145 | 1.09507007  | -2.28967205 |
| C  | -1.87149085 | 1.59899572  | -3.34041742 |
| S  | -2.24182625 | 2.29252550  | -4.78651013 |

**Name-TSOH:** G= -2830.080871//H= -2829.981559//SPE =-2830.5632154

Angstroms

| Atom | X           | Y           | Z           |
|------|-------------|-------------|-------------|
| S    | 0.51451990  | 1.83693721  | -0.99139809 |
| Ni   | 1.94743849  | 0.22400178  | -0.64302602 |
| S    | 0.64947769  | -1.15211580 | -1.74603840 |
| C    | 1.20152242  | 2.85549902  | 0.40285692  |
| C    | 2.71931334  | 2.79750036  | 0.26810272  |
| H    | 0.84928109  | 2.46507656  | 1.37071691  |
| H    | 0.84511957  | 3.89406814  | 0.29795535  |
| C    | 1.53254337  | -2.65464683 | -1.09213568 |
| C    | 3.02555230  | -2.34767566 | -1.14941286 |
| H    | 1.29457486  | -3.51324052 | -1.74210434 |
| H    | 1.19036373  | -2.89017058 | -0.07320396 |
| N    | 3.17582874  | 1.36975781  | 0.36432006  |
| N    | 3.32592771  | -1.13406009 | -0.31863245 |
| H    | 3.22799471  | 3.40668576  | 1.04037218  |
| H    | 3.01534092  | 3.17775204  | -0.72258273 |
| C    | 4.48565429  | 1.09560820  | -0.31060626 |
| C    | 4.56982667  | -0.40422438 | -0.73221587 |
| H    | 4.62865398  | -0.46638029 | -1.82779969 |
| H    | 5.46271076  | -0.90255019 | -0.31094557 |
| H    | 4.52414462  | 1.72482657  | -1.21074766 |
| H    | 5.32384815  | 1.38760920  | 0.34881326  |
| C    | 3.21209688  | 0.95600680  | 1.80742107  |
| C    | 3.38724884  | -1.52147037 | 1.12938711  |
| H    | 2.38304498  | -1.85518328 | 1.42401933  |
| H    | 4.07050779  | -2.38785954 | 1.22465127  |
| H    | 3.76709478  | 1.73027404  | 2.37191387  |
| H    | 2.17619866  | 0.94290303  | 2.17156594  |
| C    | 3.88996030  | -0.39369544 | 2.02727190  |
| P    | -2.80475687 | 1.39200045  | -0.23867912 |
| P    | -2.63297716 | -1.34458337 | -0.47583624 |
| H    | 3.31627287  | -2.12206326 | -2.18772157 |
| H    | 3.63454816  | -3.20189391 | -0.79436922 |

|    |             |             |             |
|----|-------------|-------------|-------------|
| C  | -3.37026820 | -1.36451624 | 1.27290067  |
| C  | -3.49248989 | 1.14341381  | 1.50070528  |
| N  | -2.93136938 | -0.14218897 | 2.03623079  |
| H  | -2.97701538 | -2.24001626 | 1.81095895  |
| H  | -4.47094231 | -1.39695633 | 1.26522721  |
| H  | -3.12866498 | 1.95240982  | 2.15263484  |
| H  | -4.59208078 | 1.09787755  | 1.53526947  |
| C  | -3.12672018 | -0.29065247 | 3.51021378  |
| H  | -2.71824865 | 0.59904221  | 4.00863572  |
| H  | -2.59424095 | -1.19229240 | 3.84495845  |
| H  | -4.20208538 | -0.38473936 | 3.71683349  |
| C  | -4.11374479 | -0.76480393 | -1.45892900 |
| C  | -4.24228700 | 0.76674051  | -1.27454024 |
| C  | -2.51716234 | -3.15208966 | -0.81365404 |
| H  | -2.24442224 | -3.29065817 | -1.87210152 |
| H  | -3.47590845 | -3.65862573 | -0.61198859 |
| H  | -1.72675443 | -3.58740992 | -0.18213343 |
| C  | -2.89297576 | 3.22189977  | -0.40676867 |
| H  | -2.17276878 | 3.68701085  | 0.28455719  |
| H  | -3.91041217 | 3.58824557  | -0.19062355 |
| H  | -2.61903890 | 3.48728513  | -1.43996202 |
| H  | 3.71942014  | -0.69130420 | 3.07526137  |
| H  | 4.98161922  | -0.28634599 | 1.91323036  |
| H  | -4.18953340 | 1.28997789  | -2.24175988 |
| H  | -5.18675723 | 1.05143635  | -0.78147983 |
| H  | -5.01676273 | -1.30834898 | -1.13347598 |
| H  | -3.91771605 | -1.02353880 | -2.51210781 |
| O  | 0.33266833  | -0.16047863 | 3.04515180  |
| C  | 0.07459058  | -1.07193775 | 2.30817577  |
| H  | -0.57257635 | -0.12352931 | 0.87064343  |
| Fe | -1.08635728 | 0.14887400  | -0.64370979 |
| O  | -0.05612672 | -2.21251642 | 1.96592387  |
| H  | -1.90075145 | -0.05872467 | 1.79196856  |
| O  | -1.48274976 | 0.58644207  | -2.62394893 |
| H  | -1.53400698 | -0.29969334 | -3.03026064 |

**Name-TSP:**G= -3420.133991//H= -3420.029853//SPE=-3420.5961943  
Angstroms

| Atom | X          | Y           | Z           |
|------|------------|-------------|-------------|
| S    | 0.21053256 | 1.70535461  | -1.44309622 |
| Ni   | 1.43442267 | 0.04684108  | -0.60240556 |
| S    | 0.28956064 | -1.57148630 | -1.60896304 |
| C    | 0.75573536 | 3.03652794  | -0.25146906 |
| C    | 2.28841342 | 3.14959173  | -0.25997625 |
| H    | 0.37898471 | 2.79676424  | 0.75491533  |
| H    | 0.29799065 | 3.98618772  | -0.57740428 |
| C    | 0.93372621 | -3.01334167 | -0.61229600 |
| C    | 2.47018599 | -3.02112103 | -0.62576500 |
| H    | 0.53926020 | -3.93476477 | -1.07333887 |
| H    | 0.54814859 | -2.94377196 | 0.41474727  |

|    |             |             |             |
|----|-------------|-------------|-------------|
| H  | 2.65955414  | 3.82333792  | 0.53179482  |
| H  | 2.65695748  | 3.51740859  | -1.23312728 |
| C  | 4.35017017  | 0.94325096  | -1.17261468 |
| C  | 4.39736613  | -0.61967605 | -1.24788237 |
| H  | 4.19577767  | -0.96456381 | -2.27416247 |
| H  | 5.37639555  | -1.01857144 | -0.93443743 |
| H  | 4.11405110  | 1.37185452  | -2.15899965 |
| H  | 5.30874479  | 1.36784420  | -0.83061690 |
| C  | 3.72848183  | 1.30325032  | 1.66102245  |
| C  | 3.78779281  | -1.32249023 | 1.52508030  |
| H  | 2.97580691  | -1.53046528 | 2.24054209  |
| H  | 4.50080370  | -2.16453352 | 1.56944097  |
| H  | 4.40318803  | 2.16798104  | 1.78874432  |
| H  | 2.90956869  | 1.39800398  | 2.39161336  |
| C  | 4.52313624  | -0.00561397 | 1.85754578  |
| P  | -2.93877494 | 1.33593911  | -0.11712997 |
| P  | -2.79221935 | -1.42067068 | -0.01806807 |
| C  | -1.97588317 | 0.03591402  | -2.41566925 |
| N  | -2.37279132 | 0.05796260  | -3.54807301 |
| H  | 2.86106779  | -3.23154813 | -1.63642062 |
| H  | 2.88815405  | -3.76655778 | 0.07297207  |
| C  | -3.15929735 | -1.22737421 | 1.82901266  |
| C  | -3.30171850 | 1.28841111  | 1.73626291  |
| N  | -2.62454965 | 0.08694255  | 2.32495459  |
| H  | -2.62980131 | -2.01958495 | 2.37944619  |
| H  | -4.23716060 | -1.27757608 | 2.04779693  |
| H  | -2.85977788 | 2.17665007  | 2.21249523  |
| H  | -4.37882210 | 1.23839342  | 1.95786328  |
| C  | -2.54212071 | 0.14283254  | 3.81680666  |
| H  | -2.07020359 | 1.09197401  | 4.10540585  |
| H  | -1.93667041 | -0.70529337 | 4.16620679  |
| H  | -3.55872660 | 0.07973465  | 4.22897216  |
| C  | -4.44005034 | -0.93464088 | -0.75086505 |
| C  | -4.52918491 | 0.61083509  | -0.79010537 |
| C  | -2.71676608 | -3.24877360 | -0.17614353 |
| H  | -2.60833376 | -3.50064399 | -1.24276488 |
| H  | -3.63505697 | -3.71148623 | 0.22186587  |
| H  | -1.84023466 | -3.62568422 | 0.37300686  |
| C  | -3.05815326 | 3.13229084  | -0.47422804 |
| H  | -2.24902313 | 3.66489709  | 0.04811632  |
| H  | -4.03534371 | 3.52596499  | -0.14903825 |
| H  | -2.94415962 | 3.27657879  | -1.56013358 |
| H  | 4.84413667  | -0.05329453 | 2.91266503  |
| H  | 5.44987414  | 0.04498262  | 1.25982216  |
| H  | -4.63556568 | 0.97831593  | -1.82267223 |
| H  | -5.37653674 | 0.99591693  | -0.19962404 |
| H  | -5.25298136 | -1.38850330 | -0.16043255 |
| H  | -4.47149294 | -1.36219445 | -1.76558046 |
| O  | 0.64391381  | 0.81307781  | 2.67897687  |
| C  | 0.46616079  | -0.30918748 | 2.28505211  |
| H  | -0.50640973 | -0.01221695 | 0.78266607  |
| Fe | -1.30806180 | 0.01698923  | -0.67492106 |

|   |             |             |             |
|---|-------------|-------------|-------------|
| O | 0.47047164  | -1.50806461 | 2.36367763  |
| H | -1.65779050 | 0.13064842  | 1.88808827  |
| P | 3.03519275  | -1.31092029 | -0.16866292 |
| P | 2.96368438  | 1.43459177  | -0.02041896 |

**Name-TSPy:** G=-2963.607796//H=-2963.485236//SPE=-2964.15051026

Angstroms

| Atom | X           | Y           | Z           |
|------|-------------|-------------|-------------|
| S    | 0.49685704  | 1.99306614  | -0.41280674 |
| Ni   | 1.94242281  | 0.36004445  | -0.48395378 |
| S    | 0.64811735  | -0.69377265 | -1.89643772 |
| C    | 1.16799591  | 2.60799176  | 1.20938654  |
| C    | 2.68563916  | 2.62567725  | 1.04727698  |
| H    | 0.83611980  | 1.95682184  | 2.03312283  |
| H    | 0.78571223  | 3.62613281  | 1.39180603  |
| C    | 1.53232281  | -2.30977083 | -1.62424241 |
| C    | 3.02273546  | -1.98361262 | -1.64123252 |
| H    | 1.27950303  | -2.98997520 | -2.45457712 |
| H    | 1.21180886  | -2.77725596 | -0.68214232 |
| N    | 3.17706373  | 1.23592503  | 0.75703658  |
| N    | 3.34258718  | -1.01061770 | -0.54275144 |
| H    | 3.19071294  | 3.02114422  | 1.94949446  |
| H    | 2.95759931  | 3.26494067  | 0.19214557  |
| C    | 4.45846503  | 1.18157457  | -0.02012727 |
| C    | 4.55629653  | -0.16582985 | -0.80255795 |
| H    | 4.57500761  | 0.04461332  | -1.88093366 |
| H    | 5.47380449  | -0.72710273 | -0.54609214 |
| H    | 4.43496068  | 2.01384724  | -0.73756120 |
| H    | 5.32231317  | 1.33244061  | 0.65326755  |
| C    | 3.28787006  | 0.47290556  | 2.04485127  |
| C    | 3.47245492  | -1.74881434 | 0.75678930  |
| H    | 2.48945676  | -2.17579264 | 0.99607696  |
| H    | 4.17471450  | -2.59061291 | 0.60244939  |
| H    | 3.85756166  | 1.09500201  | 2.76178321  |
| H    | 2.27026743  | 0.34280976  | 2.43675022  |
| C    | 3.99487976  | -0.87063951 | 1.89040205  |
| P    | -2.80711865 | 1.34456185  | 0.29222908  |
| P    | -2.67608363 | -1.23111396 | -0.69908556 |
| H    | 3.28739762  | -1.50561523 | -2.59796179 |
| H    | 3.64119687  | -2.89479101 | -1.52516307 |
| C    | -3.29495524 | -1.74678164 | 1.01654347  |
| C    | -3.41394875 | 0.60403963  | 1.91995882  |
| N    | -2.82931571 | -0.76946026 | 2.06088849  |
| H    | -2.85479748 | -2.72245460 | 1.27238525  |
| H    | -4.39311645 | -1.81225839 | 1.05861269  |
| H    | -3.03363309 | 1.20750669  | 2.75807763  |
| H    | -4.51125506 | 0.53455217  | 1.97153382  |
| C    | -2.96239187 | -1.31155938 | 3.44782162  |
| H    | -2.52742533 | -0.58642488 | 4.14910557  |
| H    | -2.42355516 | -2.26782710 | 3.50513858  |

|    |             |             |             |
|----|-------------|-------------|-------------|
| H  | -4.02875969 | -1.46316360 | 3.66617447  |
| C  | -4.21245277 | -0.41215462 | -1.37479061 |
| C  | -4.29764328 | 1.02410724  | -0.79851817 |
| C  | -2.55431729 | -2.85857590 | -1.53930799 |
| H  | -2.33528909 | -2.68047771 | -2.60397578 |
| H  | -3.49349124 | -3.42856007 | -1.44404460 |
| H  | -1.72329650 | -3.42750181 | -1.09285084 |
| C  | -2.85376679 | 3.14447455  | 0.64530736  |
| H  | -2.08838156 | 3.38702106  | 1.39890003  |
| H  | -3.84969917 | 3.44462972  | 1.01053323  |
| H  | -2.62398690 | 3.68269378  | -0.28783952 |
| H  | 3.87454627  | -1.42593472 | 2.83532971  |
| H  | 5.07868422  | -0.70959599 | 1.76564300  |
| H  | -4.27125845 | 1.77686757  | -1.60145431 |
| H  | -5.21438453 | 1.18291734  | -0.20728543 |
| H  | -5.09641574 | -1.01980134 | -1.12036891 |
| H  | -4.10975323 | -0.39510433 | -2.47140424 |
| O  | 0.44200410  | -0.95809212 | 2.92314951  |
| C  | 0.16144987  | -1.66489323 | 1.99348985  |
| H  | -0.55713124 | -0.45718082 | 0.87092936  |
| Fe | -1.11702450 | 0.26934513  | -0.53844057 |
| O  | 0.03800648  | -2.69704310 | 1.39514850  |
| H  | -1.80887086 | -0.61473674 | 1.81063145  |
| N  | -1.59321951 | 1.07135967  | -2.23950230 |
| C  | -1.85595510 | 0.37738685  | -3.41698816 |
| C  | -1.74301177 | 2.43415685  | -2.47921985 |
| C  | -2.17611550 | 1.30646408  | -4.41659602 |
| H  | -1.79803435 | -0.70941493 | -3.46182148 |
| C  | -2.10446528 | 2.61043995  | -3.82214740 |
| H  | -1.57499085 | 3.17134954  | -1.69516522 |
| H  | -2.43053524 | 1.08230161  | -5.44705908 |
| H  | -2.29468186 | 3.55554748  | -4.31954593 |

**Name-TSSCH3:** G= -3192.176459//H= -3192.073601//SPE =-3192.6826118  
 Angstroms

| Atom | X          | Y           | Z           |
|------|------------|-------------|-------------|
| S    | 0.52630250 | -1.80598804 | -0.74480298 |
| Ni   | 1.99253426 | -0.55362928 | 0.27607803  |
| S    | 0.61092801 | -0.36136495 | 1.96285945  |
| C    | 1.34055162 | -1.51823489 | -2.39611399 |
| C    | 2.83671737 | -1.71794628 | -2.16457720 |
| H    | 1.10402946 | -0.51309391 | -2.77865067 |
| H    | 0.95840978 | -2.26193443 | -3.11585859 |
| C    | 1.50820722 | 1.14206169  | 2.60353171  |
| C    | 2.99389475 | 0.79388956  | 2.55864240  |
| H    | 1.18968384 | 1.32735239  | 3.64343392  |
| H    | 1.26643188 | 2.03225973  | 2.00351558  |

|    |             |             |             |
|----|-------------|-------------|-------------|
| N  | 3.32606409  | -0.71972628 | -1.15381144 |
| N  | 3.40154469  | 0.50714046  | 1.14172770  |
| H  | 3.41739549  | -1.61612548 | -3.10179216 |
| H  | 3.01507813  | -2.72663217 | -1.75831072 |
| C  | 4.52173099  | -1.16482239 | -0.36557323 |
| C  | 4.57247511  | -0.42058917 | 1.00787453  |
| H  | 4.49277485  | -1.15761374 | 1.81909557  |
| H  | 5.51924711  | 0.13520308  | 1.14105424  |
| H  | 4.40437595  | -2.24246287 | -0.18465118 |
| H  | 5.44743347  | -1.01146659 | -0.95122805 |
| C  | 3.58826342  | 0.58742406  | -1.84237211 |
| C  | 3.65908137  | 1.80010565  | 0.42705454  |
| H  | 2.70438538  | 2.33830038  | 0.36127799  |
| H  | 4.34516553  | 2.40568409  | 1.05065204  |
| H  | 4.22724679  | 0.38612981  | -2.72387073 |
| H  | 2.62382174  | 0.96961639  | -2.20188868 |
| C  | 4.28851134  | 1.60794218  | -0.94987220 |
| P  | -2.75433970 | -0.60358889 | -1.12002882 |
| P  | -2.62562359 | 0.73399271  | 1.27338734  |
| H  | 3.17710137  | -0.11706940 | 3.15087826  |
| H  | 3.62148257  | 1.60785559  | 2.97127584  |
| C  | -3.09915258 | 2.29830099  | 0.31646567  |
| C  | -3.26149660 | 1.05997844  | -1.88091962 |
| N  | -2.62275759 | 2.17213776  | -1.10316506 |
| H  | -2.57200568 | 3.16016231  | 0.75381836  |
| H  | -4.18407722 | 2.48651946  | 0.31315917  |
| H  | -2.86706344 | 1.11878996  | -2.90665582 |
| H  | -4.35212812 | 1.20939768  | -1.89076420 |
| C  | -2.64485030 | 3.47255916  | -1.83712638 |
| H  | -2.19555189 | 3.32332125  | -2.82877097 |
| H  | -2.06648200 | 4.21168766  | -1.26501431 |
| H  | -3.68788153 | 3.80368914  | -1.93869477 |
| C  | -4.25423930 | -0.18944209 | 1.19121196  |
| C  | -4.32062161 | -0.96067042 | -0.14833964 |
| C  | -2.55201747 | 1.39062969  | 2.99158362  |
| H  | -2.42987399 | 0.53999049  | 3.68088793  |
| H  | -3.47334437 | 1.94074995  | 3.24610921  |
| H  | -1.67954116 | 2.05583898  | 3.08901806  |
| C  | -2.85990136 | -1.67983234 | -2.61207411 |
| H  | -2.04446405 | -1.41082268 | -3.30226246 |
| H  | -3.83221244 | -1.55877984 | -3.11843435 |
| H  | -2.73319110 | -2.72909140 | -2.30568124 |
| H  | 4.27352321  | 2.58047033  | -1.46941454 |
| H  | 5.35195169  | 1.33766823  | -0.83816190 |
| H  | -4.37049291 | -2.04675971 | 0.02009128  |
| H  | -5.19393110 | -0.66993919 | -0.75660449 |
| H  | -5.08345972 | 0.52885907  | 1.30590549  |
| H  | -4.26961019 | -0.88321555 | 2.04524574  |
| O  | 0.65813844  | 2.15284581  | -2.19990665 |
| C  | 0.46822185  | 2.42821392  | -1.04847725 |
| H  | -0.45475613 | 0.92601811  | -0.48903280 |
| Fe | -1.08856030 | -0.38145212 | 0.23631970  |

|   |             |             |             |
|---|-------------|-------------|-------------|
| O | 0.46506764  | 3.09820943  | -0.05441794 |
| H | -1.62834537 | 1.81052081  | -0.97758053 |
| S | -1.66651977 | -2.36029309 | 1.45122010  |
| C | -2.06088318 | -3.75149493 | 0.31563853  |
| H | -2.02789397 | -4.68958026 | 0.89620798  |
| H | -3.06529756 | -3.66996814 | -0.13439401 |
| H | -1.31481103 | -3.81961699 | -0.49521449 |

**Name-TSSCN:**G=-3245.111734//H=-3244.985362//SPE=-3245.61652469  
Angstroms

| Atom | X           | Y           | Z           |
|------|-------------|-------------|-------------|
| S    | 1.48253697  | 1.10984208  | -2.18292886 |
| Ni   | 2.19268418  | -0.92652548 | -1.85069358 |
| S    | 0.11793432  | -1.60927574 | -1.75003037 |
| C    | 3.10479882  | 1.83803079  | -1.63696214 |
| C    | 4.18198895  | 1.02797421  | -2.35341386 |
| H    | 3.19646793  | 1.79105610  | -0.54056092 |
| H    | 3.14459863  | 2.89556694  | -1.94690108 |
| C    | 0.60406061  | -3.22547175 | -0.96329573 |
| C    | 1.81525892  | -3.72745349 | -1.74368710 |
| H    | -0.23735584 | -3.93075252 | -1.06648952 |
| H    | 0.81586472  | -3.09140404 | 0.10721303  |
| N    | 4.07961058  | -0.41507329 | -1.94809742 |
| N    | 2.93333852  | -2.72965172 | -1.64381433 |
| H    | 5.19771011  | 1.40844015  | -2.13195007 |
| H    | 4.02274264  | 1.08452341  | -3.44213448 |
| C    | 4.59146917  | -1.38397681 | -2.97189117 |
| C    | 3.90115119  | -2.77248807 | -2.79088016 |
| H    | 3.31833995  | -3.00510715 | -3.69296110 |
| H    | 4.63728043  | -3.58343044 | -2.63886358 |
| H    | 4.32941255  | -0.97733003 | -3.95875814 |
| H    | 5.69297011  | -1.45884680 | -2.91235170 |
| C    | 4.76487996  | -0.60601299 | -0.62639726 |
| C    | 3.64580562  | -2.90650391 | -0.33548716 |
| H    | 2.93619736  | -2.65955182 | 0.46534068  |
| H    | 3.90854046  | -3.97694852 | -0.23188743 |
| H    | 5.77001006  | -0.14701326 | -0.69404830 |
| H    | 4.18549970  | -0.05366420 | 0.12543660  |
| C    | 4.92002846  | -2.07264883 | -0.23430175 |
| P    | -0.78748570 | 2.52145839  | -0.01769790 |
| P    | -1.84909955 | 0.07706667  | 0.71162091  |
| H    | 1.55398931  | -3.83036571 | -2.80905357 |
| H    | 2.15946783  | -4.71269808 | -1.37351683 |
| C    | -1.41614445 | 0.60237823  | 2.48048943  |
| C    | -0.44755536 | 2.83258349  | 1.81363184  |
| N    | -0.21703084 | 1.51053943  | 2.48237459  |
| H    | -1.14024007 | -0.29320349 | 3.05750048  |
| H    | -2.25218822 | 1.12009912  | 2.97547527  |
| H    | 0.47980028  | 3.41613227  | 1.91725608  |
| H    | -1.27815310 | 3.35014874  | 2.31742069  |

|    |             |             |             |
|----|-------------|-------------|-------------|
| C  | 0.38834696  | 1.65168855  | 3.84206532  |
| H  | 1.30309708  | 2.25387516  | 3.75593394  |
| H  | 0.62609633  | 0.65006787  | 4.22717498  |
| H  | -0.33701587 | 2.14926219  | 4.50090625  |
| C  | -3.25556953 | 1.25144088  | 0.35052635  |
| C  | -2.65890716 | 2.62906930  | -0.03460925 |
| C  | -2.61752901 | -1.56411025 | 1.00400356  |
| H  | -3.04488385 | -1.91822423 | 0.05259358  |
| H  | -3.41103209 | -1.50335563 | 1.76732950  |
| H  | -1.83633612 | -2.26901384 | 1.33026237  |
| C  | -0.21378920 | 4.08465324  | -0.78829524 |
| H  | 0.87999918  | 4.16027968  | -0.68605577 |
| H  | -0.69704765 | 4.95411372  | -0.31304362 |
| H  | -0.47452698 | 4.05508947  | -1.85805392 |
| H  | 5.26839658  | -2.10745253 | 0.81123618  |
| H  | 5.71680853  | -2.53790679 | -0.83829554 |
| H  | -2.95117101 | 2.91736120  | -1.05613769 |
| H  | -2.97748966 | 3.42904578  | 0.65367422  |
| H  | -3.91982294 | 1.31210238  | 1.22827520  |
| H  | -3.82737171 | 0.81811814  | -0.48534029 |
| O  | 2.77810338  | 0.02283015  | 1.93785514  |
| C  | 1.85010648  | -0.72510016 | 1.78964054  |
| H  | 0.86039899  | 0.19117619  | 0.52921283  |
| Fe | -0.21869907 | 0.52598088  | -0.64783485 |
| O  | 1.16896438  | -1.68829753 | 2.00615906  |
| H  | 0.45456866  | 1.02709017  | 1.81671208  |
| C  | -1.91286758 | 2.82743287  | -2.86678869 |
| N  | -2.03040464 | 3.90401866  | -3.37429639 |
| S  | -2.08845698 | 0.99191267  | -2.29265647 |
